# Supplementary material for: A concise protocol for the synthesis of 2-alkenylindoles through [4 + 1] annulation of aminobenzyl phosphonium salts with acrylaldehydes
Source: Royal Society of Chemistry journal article supplement (doi:10.1039/d4gc02859g), 2024-01-01

## *Supporting Information*

# **A Concise Protocol for the Synthesis of 2-Alkenylindoles through [4+1] Annulation of Aminobenzyl Phosphonium Salts with Acrylaldehydes**

Jia-Cheng Yang,<sup>a,†</sup> Mao-Lin Liao,<sup>a,†</sup> Ping-Gui Li<sup>\*,b</sup> and Liang-Hua Zou<sup>\*,a,c</sup>

- <sup>a</sup> Key Laboratory of Carbohydrate Chemistry and Biotechnology, Ministry of Education; School of Life Science and Health Engineering, Jiangnan University, Wuxi 214122, P.R. China
- <sup>b</sup> School of Environmental Engineering, Wuxi University, Wuxi 214105, P.R. China
- <sup>c</sup> School of Chemistry and Chemical Engineering, Henan Normal University, Xinxiang 453007, P.R. China
- \* Correspondence: lipg@cw Xu.edu.cn; zoulianghua@jiangnan.edu.cn
- † These authors contributed equally to this work.

## **Contents**

|                                                                             |     |
|-----------------------------------------------------------------------------|-----|
| 1. General Information .....                                                | S2  |
| 2. Synthesis of Starting Materials <b>1a-1g</b> .....                       | S2  |
| 3. Optimization Studies .....                                               | S4  |
| 4. General Procedure for the Synthesis of Products <b>3-51</b> .....        | S5  |
| 5. Gram-scale Reaction .....                                                | S5  |
| 6. Product Derivatization for the Synthesis of Compounds <b>52-56</b> ..... | S5  |
| 7. Control Reactions .....                                                  | S6  |
| 8. Analytical Data of the Products.....                                     | S6  |
| 9. X-Ray Crystallographic Data of Product <b>41</b> .....                   | S19 |
| 10. Reference .....                                                         | S20 |
| 11. NMR Spectra .....                                                       | S21 |

## 1. General Information

All solvents were dried over molecular sieves. Unless otherwise noted, materials obtained from commercial suppliers were used without further purification. Aminobenzyl phosphonium salts **1a-1g** were synthesized according to the reference.<sup>1</sup> The products were isolated by column chromatography on silica gel (200-300 mesh) by using petroleum ether (PE, 30-60 °C) and ethyl acetate (EA) as eluents. Silica gel for column chromatography was purchased from AnhuiLiangchen Chemical Co, Lt. All yields described herein are the isolated yields after column chromatography. Reaction progress and product mixtures were routinely monitored by TLC using TLC SiO<sub>2</sub> sheets, and compounds were visualized under ultraviolet light. <sup>1</sup>H NMR, <sup>13</sup>C NMR and <sup>19</sup>F NMR spectra were recorded on a Bruker AVANCE III 400 spectrometer. The spectra were recorded using CDCl<sub>3</sub> or DMSO-*d*<sub>6</sub> as a solvent. <sup>1</sup>H NMR chemical shifts are referenced to tetramethylsilane (TMS, 0 ppm). Abbreviations are as follows: s (singlet), d (doublet), t (triplet), q (quartet), m (multiplet). High-Resolution Mass Spectra (HRMS) were recorded on Agilent 6540 or FTICR-MS bruker7 T. Melting points were measured with a melting point instrument (Shanghai Yidian Physical Optical Instrument Co., Ltd., SGW, X-4A) and were uncorrected.

## 2. Synthesis of Staring Materials 1a-1g

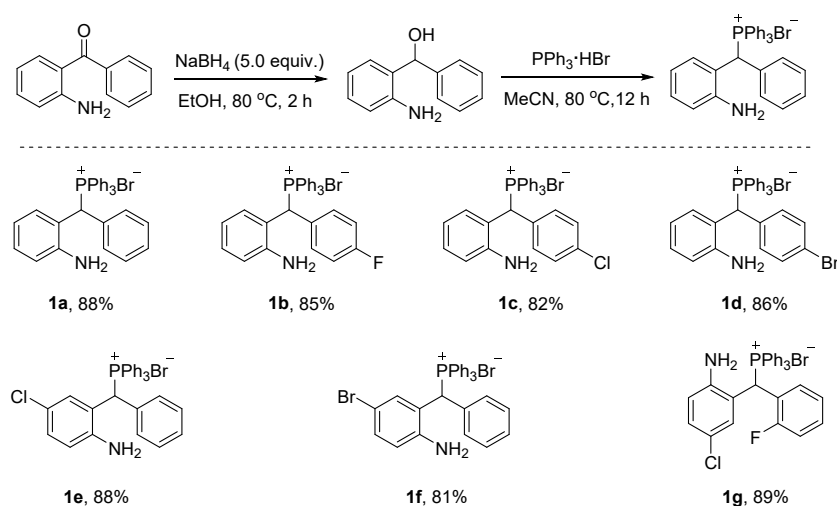

Take the synthesis of **1a** as one example. (2-aminophenyl)(phenyl)methanone (3.9 g, 20 mmol) was added in a round bottomed flask (250 mL) with a stirring bar, and dissolved in the solution of EtOH (60 mL). Next, NaBH<sub>4</sub> (3.8 g, 100 mmol) was added slowly at 0 °C and refluxed at 80 °C for 2 h. After the reaction was completed, the reaction was quenched by H<sub>2</sub>O, extracted with EA (50 mL×5), and dried *via* anhydrous sodium sulfate. Then, the product was refluxed with triphenylphosphonium bromide (7.2 g, 20 mmol) in dry acetonitrile (50 mL) for 12 h. After cooling, the resulting precipitates were filtered and washed with ether, affording product **1a** as a white powder (8.2 g, 78% yield).<sup>1</sup>

### Aminobenzyl phosphonium salt **1a**

Compound **1a** was synthesized in accordance with the typical procedure as white powder (8.2 g, 78% yield) (m.p. 188.5-190.5 °C).

<sup>1</sup>H NMR (400 MHz, DMSO-*d*<sub>6</sub>) δ 7.92-7.87 (m, 3H), 7.73 (td, *J* = 7.9, 3.7 Hz, 7H), 7.64 (dd, *J* = 12.0, 7.5 Hz, 6H), 7.40-7.22 (m, 6H), 7.06 (t, *J* = 7.6 Hz, 1H), 6.79 (d, *J* = 8.2 Hz, 1H), 6.67-6.56 (m, 2H), 6.41-6.35 (m, 1H). HRMS *m/z* (ESI) calcd for C<sub>31</sub>H<sub>27</sub>NP (M)<sup>+</sup> 444.1876, found

444.1886.

#### **Aminobenzyl phosphonium salt 1b**

Compound **1b** was synthesized in accordance with the typical procedure as a white powder (8.0 g, 74% yield) (m.p. 185.5-187.5 °C).

<sup>1</sup>H NMR (400 MHz, DMSO-*d*<sub>6</sub>) δ 7.94-7.88 (m, 3H), 7.74 (td, *J* = 7.8, 3.7 Hz, 6H), 7.69-7.59 (m, 6H), 7.39 (dd, *J* = 4.3, 2.3 Hz, 1H), 7.23 (ddt, *J* = 7.6, 5.5, 2.2 Hz, 3H), 7.14 (t, *J* = 8.7 Hz, 2H), 7.07 (t, *J* = 7.6 Hz, 1H), 6.78 (d, *J* = 8.2 Hz, 1H), 6.65-6.49 (m, 2H), 6.43-6.33 (m, 1H). HRMS *m/z* (ESI) calcd for C<sub>31</sub>H<sub>26</sub>FNP (M)<sup>+</sup> 462.1781, found 462.1772.

#### **Aminobenzyl phosphonium salt 1c**

Compound **1c** was synthesized in accordance with the typical procedure as a white powder (8.8 g, 79% yield) (m.p. 209.5-211.5 °C).

<sup>1</sup>H NMR (400 MHz, DMSO-*d*<sub>6</sub>) δ 7.94-7.89 (m, 3H), 7.74 (td, *J* = 7.9, 3.7 Hz, 6H), 7.64 (dd, *J* = 11.6, 7.6 Hz, 6H), 7.40-7.19 (m, 5H), 7.07 (t, *J* = 7.7 Hz, 1H), 6.77 (d, *J* = 8.2 Hz, 1H), 6.63-6.50 (m, 2H), 6.40-6.35 (m, 1H). HRMS *m/z* (ESI) calcd for C<sub>31</sub>H<sub>26</sub>ClNP (M)<sup>+</sup> 478.1486, found 478.1482.

#### **Aminobenzyl phosphonium salt 1d**

Compound **1d** was synthesized in accordance with the typical procedure as a white powder (8.8 g, 73% yield) (m.p. 205.5-207.5 °C).

<sup>1</sup>H NMR (400 MHz, DMSO-*d*<sub>6</sub>) δ 7.91 (td, *J* = 7.4, 1.8 Hz, 3H), 7.74 (td, *J* = 7.9, 3.7 Hz, 6H), 7.69-7.61 (m, 6H), 7.51-7.39 (m, 3H), 7.25-7.21 (m, 1H), 7.18-7.03 (m, 3H), 6.77 (d, *J* = 8.1 Hz, 1H), 6.62-6.48 (m, 2H), 6.40-6.33 (m, 1H). HRMS *m/z* (ESI) calcd for C<sub>31</sub>H<sub>26</sub>BrNP (M)<sup>+</sup> 522.0981, found 522.0988.

#### **Aminobenzyl phosphonium salt 1e**

Compound **1e** was synthesized in accordance with the typical procedure as a white powder (8.6 g, 77% yield) (m.p. 201.5-203.5 °C).

<sup>1</sup>H NMR (400 MHz, DMSO-*d*<sub>6</sub>) δ 7.93 (td, *J* = 7.3, 1.7 Hz, 3H), 7.76 (td, *J* = 7.9, 3.8 Hz, 6H), 7.68 (dd, *J* = 12.1, 7.5 Hz, 6H), 7.41-7.21 (m, 6H), 7.10 (dd, *J* = 8.8, 2.4 Hz, 1H), 6.79 (dd, *J* = 8.8, 1.3 Hz, 1H), 6.60 (d, *J* = 22.5 Hz, 1H), 6.40 (dd, *J* = 2.6, 1.1 Hz, 1H). HRMS *m/z* (ESI) calcd for C<sub>31</sub>H<sub>26</sub>ClNP (M)<sup>+</sup> 478.1486, found 478.1483.

#### **Aminobenzyl phosphonium salt 1f**

Compound **1f** was synthesized in accordance with the typical procedure as a white powder (8.5 g, 71% yield) (m.p. 203.5-205.5 °C).

<sup>1</sup>H NMR (400 MHz, DMSO-*d*<sub>6</sub>) δ 7.92 (t, *J* = 7.8 Hz, 3H), 7.80-7.66 (m, 13H), 7.42-7.23 (m, 6H), 7.19 (dd, *J* = 8.7, 2.3 Hz, 1H), 6.77-6.62 (m, 2H), 6.53 (d, *J* = 2.3 Hz, 1H). HRMS *m/z* (ESI) calcd for C<sub>31</sub>H<sub>26</sub>BrNP (M)<sup>+</sup> 522.0981, found 522.0991.

#### **Aminobenzyl phosphonium salt 1g**

Compound **1g** was synthesized in accordance with the typical procedure as a white powder (8.0 g, 70% yield) (m.p. 205.5-207.5 °C).

<sup>1</sup>H NMR (400 MHz, DMSO-*d*<sub>6</sub>) δ 7.91 (ddd, *J* = 8.8, 5.2, 1.6 Hz, 3H), 7.76-7.70 (m, 12H), 7.43-7.37 (m, 2H), 7.24-7.15 (m, 4H), 7.10 (ddd, *J* = 8.7, 2.4, 1.0 Hz, 1H), 6.86-6.78 (m, 2H), 6.57 (t, *J* = 1.5 Hz, 1H). HRMS *m/z* (ESI) calcd for C<sub>31</sub>H<sub>25</sub>ClFNP (M)<sup>+</sup> 496.1392, found 496.1383.

### 3. Optimization Studies

Table S1. Optimization of the Reaction Conditions<sup>a</sup>

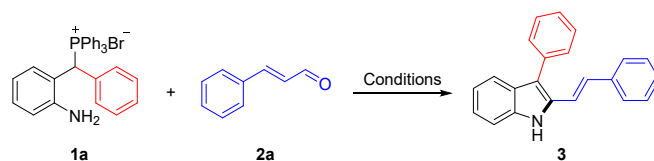

| Entry | Ligand            | Acid                           | Base                            | Solvent     | Additive                       | Temp. (°C) | Time (h) | Yield (%) |
|-------|-------------------|--------------------------------|---------------------------------|-------------|--------------------------------|------------|----------|-----------|
| 1     | /                 | /                              | /                               | DCM         | /                              | 110        | 6        | 68        |
| 2     | /                 | /                              | /                               | EtOH        | /                              | 110        | 6        | 45        |
| 3     | /                 | /                              | /                               | DCE         | /                              | 110        | 6        | 47        |
| 4     | /                 | /                              | /                               | DMF         | /                              | 110        | 6        | 43        |
| 5     | /                 | /                              | /                               | DMSO        | /                              | 110        | 6        | 0         |
| 6     | /                 | /                              | /                               | THF         | /                              | 110        | 6        | 72        |
| 7     | /                 | /                              | /                               | 2-MeTHF     | /                              | 110        | 6        | 65        |
| 8     | /                 | /                              | /                               | HFIP        | /                              | 110        | 6        | 0         |
| 9     | /                 | /                              | /                               | 1,4-dioxane | /                              | 110        | 6        | 39        |
| 10    | /                 | /                              | /                               | EA          | /                              | 110        | 6        | 63        |
| 11    | /                 | /                              | /                               | PhMe        | /                              | 110        | 6        | 61        |
| 12    | CuBr              | /                              | /                               | THF         | /                              | 110        | 6        | 72        |
| 13    | AgOTf             | /                              | /                               | THF         | /                              | 110        | 6        | 67        |
| 14    | PdCl              | /                              | /                               | THF         | /                              | 110        | 6        | 60        |
| 15    | CoCO <sub>3</sub> | /                              | /                               | THF         | /                              | 110        | 6        | 58        |
| 16    | /                 | MAS                            | /                               | /           | /                              | 110        | 6        | 41        |
| 17    | /                 | HAc                            | /                               | /           | /                              | 110        | 6        | 43        |
| 18    | /                 | TFA                            | /                               | /           | /                              | 110        | 6        | 25        |
| 19    | /                 | H <sub>3</sub> PO <sub>4</sub> | /                               | /           | /                              | 110        | 6        | Trace     |
| 20    | /                 | /                              | Cs <sub>2</sub> CO <sub>3</sub> | THF         | /                              | 110        | 6        | Trace     |
| 21    | /                 | /                              | t-BuOK                          | THF         | /                              | 110        | 6        | Trace     |
| 22    | /                 | /                              | NaH                             | THF         | /                              | 110        | 6        | Trace     |
| 23    | /                 | /                              | K <sub>2</sub> CO <sub>3</sub>  | THF         | /                              | 110        | 6        | Trace     |
| 24    | /                 | /                              | /                               | THF         | KI                             | 110        | 6        | 68        |
| 25    | /                 | /                              | /                               | THF         | KCl                            | 110        | 6        | 65        |
| 26    | /                 | /                              | /                               | THF         | K <sub>3</sub> PO <sub>4</sub> | 110        | 6        | 61        |
| 27    | /                 | /                              | /                               | THF         | /                              | 100        | 6        | 75        |
| 28    | /                 | /                              | /                               | THF         | /                              | 90         | 6        | 82        |
| 29    | /                 | /                              | /                               | THF         | /                              | 80         | 6        | 87        |
| 30    | /                 | /                              | /                               | THF         | /                              | 70         | 6        | 79        |
| 31    | /                 | /                              | /                               | THF         | /                              | 80         | 12       | 92        |
| 32    | /                 | /                              | /                               | THF         | /                              | 80         | 18       | 92        |
| 33    | /                 | /                              | /                               | THF         | /                              | 80         | 24       | 90        |

<sup>a</sup> Reaction conditions: **1a** (0.3 mmol), **2a** (0.2 mmol), solvent (1 mL), 80 °C, 12 h.

#### 4. General Procedure for the Synthesis of Products 3-51

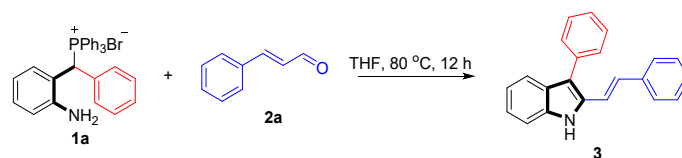

General procedure for the synthesis of products **3-51** (take the synthesis of **3** as one example): A mixture of **1a** (0.3 mmol, 1.5 equiv), **2a** (0.2 mmol, 1.0 equiv) were added in a Schlenk tube equipped with a stirring bar. Dry THF (1 mL) was added and the mixture was stirred at 80 °C for 12 h. Then, the mixture was cooled to room temperature and concentrated in vacuo, and the resulting residue was purified by flash column chromatography on silica gel with PE:EA = 10:1, affording product **3** as a yellow solid in 92% yield (54.4 mg).

#### 5. Gram-scale Reaction

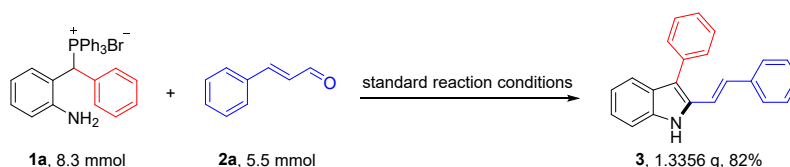

A mixture of **1a** (5.5 mmol, 1.0 equiv) and **2a** (8.3 mmol, 1.5 equiv) were added in a round bottomed flask (500 mL) with a stirring bar. Dry THF (50 mL) was added and the mixture was stirred at 80 °C in a pre-heated oil bath for 12 h. Then, the mixture was cooled to room temperature and concentrated in vacuo, and the resulting residue was purified by flash column chromatography on silica gel with PE/EA, affording product **3** as a yellow solid in 82% yield (1.3356 g).

#### 6. Product Derivatization for the Synthesis of Compounds 52-56

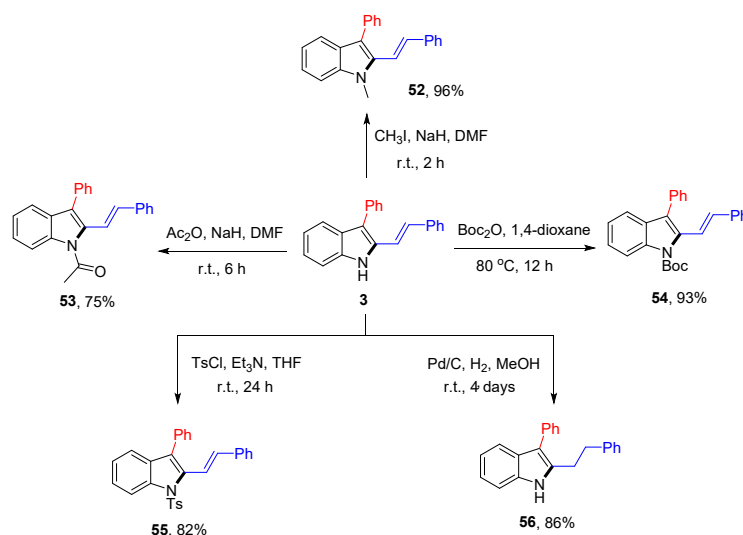

Procedure for the synthesis of compound **52**: To a solution of **3** (0.2 mmol, 1.0 equiv) in DMF (2.0 mL) was added NaH (0.3 mmol, 1.5 equiv) at 0 °C. After 10 min, CH<sub>3</sub>I was added and the mixture was stirred at r.t. for 2 h. After that, the reaction was quenched by NH<sub>4</sub>Cl solution, extracted with EA (2×30 mL) and dried (MgSO<sub>4</sub>). The combined extracts were concentrated under vacuum and purified by flash column chromatography on silica gel with PE/EA=10:1, affording product **52** as a yellow solid in 96% yield (59.3 mg).

Procedure for the synthesis of compound **53**: To a solution of **3** (0.2 mmol, 1.0 equiv) in DMF (2.0 mL) was added NaH (0.3 mmol, 1.5 equiv) at 0 °C. After 10 min, Ac<sub>2</sub>O was added and the mixture was stirred at r.t. for 6 h. After that, the reaction was quenched by NH<sub>4</sub>Cl solution, extracted with EA (2×30 mL) and dried (MgSO<sub>4</sub>). The combined extracts were concentrated under vacuum and purified by flash column chromatography on silica gel with PE/EA=10:1, affording product **53** as a yellow solid in 75% yield (50.6 mg).

Procedure for the synthesis of compound **54**: A mixture of **3** (0.2 mmol, 1.0 equiv) and Boc<sub>2</sub>O (1 mmol, 5.0 equiv) were added in a Schlenk tube with a stirring bar. Dry 1,4-dioxane (2 mL) was added and the mixture was stirred at 80 °C for 12 h. Then, the mixture was cooled to room temperature and concentrated in vacuo, and the resulting residue was purified by flash column chromatography on silica gel with PE/EA=10:1, affording product **54** as a yellow solid in 93% yield (73.5 mg).

Procedure for the synthesis of compound **55**: A mixture of **3** (0.2 mmol, 1.0 equiv) and TsCl (0.24 mmol, 1.2 equiv) with Et<sub>3</sub>N (0.3 mmol, 1.5 equiv) were added in a Schlenk tube with a stirring bar. Dry THF (2 mL) was added and the mixture was stirred at r.t. for 24 h. Then, the mixture was concentrated in vacuo, and the resulting residue was purified by flash column chromatography on silica gel with PE/EA=10:1, affording product **55** as a yellow solid in 82% yield (67.3 mg).

Procedure for the synthesis of compound **56**: A mixture of **3** (0.2 mmol, 1.0 equiv) and Pd/C (0.02 mmol, 0.1 equiv) were added in a Schlenk tube with a stirring bar. MeOH (2 mL) was added and the mixture was stirred at r.t. for 4 days under H<sub>2</sub> atmosphere. Then, the mixture was filtered by diatomite and concentrated in vacuo. After that, the resulting residue was purified by flash column chromatography on silica gel with PE/EA=10:1, affording product **56** as a yellow oil in 86% yield (51.1 mg).

## 7. Control Reactions

A mixture of **1a** (0.3 mmol, 1.5 equiv.), **2a** (0.2 mmol, 1.0 equiv.), and BHT (0.2 mmol, 1.0 equiv) were added in a Schlenk tube equipped with a stirring bar. Dry THF (1 mL) was added and the mixture was stirred at 80 °C for 12 h. Then, the mixture was cooled to room temperature and concentrated in vacuo, and the resulting residue was purified by flash column chromatography on silica gel with PE/EA, affording product **3** as a yellow solid in 90% yield (53.2 mg).

A mixture of **1a** (0.3 mmol, 1.5 equiv.), **2a** (0.2 mmol, 1.0 equiv.), and TEMPO (0.2 mmol, 1.0 equiv) were added in a Schlenk tube equipped with a stirring bar. Dry THF (1 mL) was added and the mixture was stirred at 80 °C for 12 h. Then, the mixture was cooled to room temperature and concentrated in vacuo, and the resulting residue was purified by flash column chromatography on silica gel with PE/EA, affording product **3** as a yellow solid in 87% yield (51.4 mg).

## 8. Analytical Data of the Products

### (*E*)-3-Phenyl-2-styryl-1*H*-indole (**3**)

Product **3** was synthesized in accordance with the typical procedure. Purification using flash column chromatography on silica gel (PE:EA = 10:1) afforded product **3** (31.5 mg, 78%) as a yellow solid (m.p. 99.5-101.5 °C).

<sup>1</sup>H NMR (400 MHz, CDCl<sub>3</sub>) δ 8.28 (s, 1H), 7.76 (d, *J* = 7.9 Hz, 1H), 7.64-7.60 (m, 2H), 7.56 (d, *J* = 15.3 Hz, 2H), 7.45 (dd, *J* = 10.4, 7.2 Hz, 3H), 7.41-7.35 (m, 3H), 7.33-7.26 (m, 3H), 7.22-

7.17 (m, 1H), 6.91 (d,  $J = 16.6$  Hz, 1H).  $^{13}\text{C}$  NMR (101 MHz,  $\text{CDCl}_3$ )  $\delta$  137.0, 136.5, 134.6, 132.6, 130.2, 128.9, 128.8, 128.3, 127.8, 127.4, 126.7, 126.5, 123.7, 120.5, 119.8, 118.9, 118.0, 110.8. The NMR spectra are consistent with the reported literature.<sup>2</sup>

#### **(E)-3-(4-Fluorophenyl)-2-styryl-1H-indole (4)**

Product **4** was synthesized in accordance with the typical procedure. Purification using flash column chromatography on silica gel (PE:EA = 10:1) afforded product **4** (53.2 mg, 85%) as a yellow solid (m.p. 95.5-97.5 °C).

$^1\text{H}$  NMR (400 MHz,  $\text{CDCl}_3$ )  $\delta$  8.28 (s, 1H), 7.69 (d,  $J = 7.9$  Hz, 1H), 7.56-7.51 (m, 2H), 7.49-7.45 (m, 2H), 7.40 (t,  $J = 7.6$  Hz, 3H), 7.34-7.29 (m, 2H), 7.27-7.18 (m, 4H), 6.91 (d,  $J = 16.6$  Hz, 1H).  $^{13}\text{C}$  NMR (101 MHz,  $\text{CDCl}_3$ )  $\delta$  163.1, 160.7, 136.9, 136.4, 132.6, 131.7, 131.6, 130.5, 130.5, 128.9, 128.3, 127.9, 127.6, 126.5, 123.8, 120.6, 119.6, 117.8, 117.7, 115.8, 115.6, 110.8.  $^{19}\text{F}$  NMR (376 MHz,  $\text{CDCl}_3$ )  $\delta$  -115.7. HRMS  $m/z$  (ESI) calcd for  $\text{C}_{22}\text{H}_{16}\text{FN}$  ( $\text{M}+\text{H}$ )<sup>+</sup> 314.1340, found 314.1348.

#### **(E)-3-(4-Chlorophenyl)-2-styryl-1H-indole (5)**

Product **5** was synthesized in accordance with the typical procedure. Purification using flash column chromatography on silica gel (PE:EA = 10:1) afforded product **5** (59.9 mg, 91%) as a yellow solid (m.p. 102.5-104.5 °C).

$^1\text{H}$  NMR (400 MHz,  $\text{CDCl}_3$ )  $\delta$  8.27 (s, 1H), 7.69 (d,  $J = 7.1$  Hz, 1H), 7.51 (s, 6H), 7.42-7.38 (m, 3H), 7.31 (t,  $J = 7.0$  Hz, 2H), 7.22-7.17 (m, 2H), 6.90 (d,  $J = 16.5$  Hz, 1H).  $^{13}\text{C}$  NMR (101 MHz,  $\text{CDCl}_3$ )  $\delta$  136.7, 134.8, 133.9, 133.9, 130.1, 129.4, 128.9, 128.2, 128.1, 126.9, 126.6, 126.2, 123.8, 119.2, 118.3, 117.6, 111.8. HRMS  $m/z$  (ESI) calcd for  $\text{C}_{22}\text{H}_{16}\text{ClN}$  ( $\text{M}+\text{H}$ )<sup>+</sup> 330.1044, found 330.1051.

#### **(E)-3-(4-Bromophenyl)-2-styryl-1H-indole (6)**

Product **6** was synthesized in accordance with the typical procedure. Purification using flash column chromatography on silica gel (PE:EA = 10:1) afforded product **6** (68.8 mg, 92%) as a yellow solid (m.p. 113.5-115.5 °C).

$^1\text{H}$  NMR (400 MHz,  $\text{CDCl}_3$ )  $\delta$  8.29 (s, 1H), 7.71-7.62 (m, 3H), 7.49-7.42 (m, 4H), 7.41-7.37 (m, 3H), 7.31 (td,  $J = 8.1, 7.7, 1.2$  Hz, 2H), 7.21-7.16 (m, 2H), 6.90 (d,  $J = 16.5$  Hz, 1H).  $^{13}\text{C}$  NMR (101 MHz,  $\text{CDCl}_3$ )  $\delta$  136.8, 136.5, 133.6, 132.7, 131.9, 131.7, 128.9, 128.0, 127.9, 126.5, 123.8, 120.7, 120.6, 119.5, 117.5, 110.9. HRMS  $m/z$  (ESI) calcd for  $\text{C}_{22}\text{H}_{16}\text{BrN}$  ( $\text{M}+\text{H}$ )<sup>+</sup> 374.0539, found 374.0551.

#### **(E)-5-Chloro-3-phenyl-2-styryl-1H-indole (7)**

Product **7** was synthesized in accordance with the typical procedure. Purification using flash column chromatography on silica gel (PE:EA = 10:1) afforded product **7** (60.5 mg, 92%) as a yellow solid (m.p. 107.5-109.5 °C).

$^1\text{H}$  NMR (400 MHz,  $\text{CDCl}_3$ )  $\delta$  8.39 (s, 1H), 7.67 (d,  $J = 2.0$  Hz, 1H), 7.54 (d,  $J = 5.2$  Hz, 4H), 7.46-7.41 (m, 3H), 7.36 (t,  $J = 7.5$  Hz, 2H), 7.29 (dd,  $J = 7.8, 5.4$  Hz, 2H), 7.23-7.18 (m, 2H), 6.92 (d,  $J = 16.5$  Hz, 1H).  $^{13}\text{C}$  NMR (101 MHz,  $\text{CDCl}_3$ )  $\delta$  136.7, 134.8, 133.9, 133.9, 130.1, 129.3, 128.9, 128.3, 128.1, 126.9, 126.6, 126.2, 123.8, 119.1, 118.3, 117.5, 111.8. The NMR spectra are consistent with the reported literature.<sup>2</sup>

#### **(E)-5-Chloro-3-phenyl-2-styryl-1H-indole (8)**

Product **8** was synthesized in accordance with the typical procedure. Purification using flash

column chromatography on silica gel (PE:EA = 10:1) afforded product **8** (71.8 mg, 96%) as a yellow solid (m.p. 97.5-99.5 °C).

<sup>1</sup>H NMR (400 MHz, CDCl<sub>3</sub>) δ 8.41 (s, 1H), 7.81 (d, *J* = 1.8 Hz, 1H), 7.54-7.51 (m, 4H), 7.45-7.41 (m, 3H), 7.38-7.31 (m, 3H), 7.29 (d, *J* = 7.2 Hz, 1H), 7.25-7.17 (m, 2H), 6.93 (d, *J* = 16.6 Hz, 1H). <sup>13</sup>C NMR (101 MHz, CDCl<sub>3</sub>) δ 136.7, 135.1, 133.9, 133.7, 130.1, 130.0, 128.9, 128.4, 128.1, 126.9, 126.6, 126.3, 122.2, 118.2, 117.5, 113.7, 112.3. HRMS *m/z* (ESI) calcd for C<sub>22</sub>H<sub>16</sub>BrN (M+H)<sup>+</sup> 374.0539, found 374.0534.

#### **(E)-5-Chloro-3-(2-fluorophenyl)-2-styryl-1H-indole (9)**

Product **9** was synthesized in accordance with the typical procedure. Purification using flash column chromatography on silica gel (PE:EA = 10:1) afforded product **9** (65.2 mg, 94%) as a yellow solid (m.p. 137.5-139.5 °C).

<sup>1</sup>H NMR (400 MHz, CDCl<sub>3</sub>) δ 8.35 (s, 1H), 7.50 (t, *J* = 1.9 Hz, 1H), 7.48-7.37 (m, 4H), 7.36-7.25 (m, 5H), 7.24-7.18 (m, 2H), 7.05 (dd, *J* = 16.6, 1.6 Hz, 1H), 6.88 (d, *J* = 16.6 Hz, 1H). <sup>13</sup>C NMR (101 MHz, CDCl<sub>3</sub>) δ 161.5, 159.1, 136.6, 134.8, 134.7, 132.9, 132.9, 129.6, 129.2, 129.2, 128.9, 128.5, 128.2, 126.6, 126.2, 124.5, 124.4, 123.8, 121.4, 121.3, 119.4, 119.4, 117.4, 117.4, 116.4, 116.2, 111.8, 111.7. <sup>19</sup>F NMR (376 MHz, CDCl<sub>3</sub>) δ -112.8. HRMS *m/z* (ESI) calcd for C<sub>22</sub>H<sub>15</sub>ClFN (M+H)<sup>+</sup> 348.0950, found 348.0954.

#### **(E)-2-(2-Methylstyryl)-3-phenyl-1H-indole (10)**

Product **10** was synthesized in accordance with the typical procedure. Purification using flash column chromatography on silica gel (PE:EA = 10:1) afforded product **10** (55.6 mg, 90%) as a yellow solid (m.p. 91.5-93.5 °C).

<sup>1</sup>H NMR (400 MHz, CDCl<sub>3</sub>) δ 8.35 (s, 1H), 7.76 (d, *J* = 9.0 Hz, 1H), 7.62 (dd, *J* = 8.1, 1.3 Hz, 2H), 7.57-7.52 (m, 3H), 7.45-7.39 (m, 2H), 7.31 (t, *J* = 7.0 Hz, 1H), 7.24-7.16 (m, 6H), 2.50 (s, 3H). <sup>13</sup>C NMR (101 MHz, CDCl<sub>3</sub>) δ 136.5, 136.0, 135.7, 134.6, 132.9, 130.6, 130.2, 128.8, 128.3, 127.8, 126.6, 126.4, 125.3, 125.0, 123.7, 120.5, 119.9, 119.3, 118.8, 110.8, 20.2. HRMS *m/z* (ESI) calcd for C<sub>23</sub>H<sub>19</sub>N (M+H)<sup>+</sup> 310.1590, found 310.1600.

#### **(E)-2-(2-Methoxystyryl)-3-phenyl-1H-indole (11)**

Product **11** was synthesized in accordance with the typical procedure. Purification using flash column chromatography on silica gel (PE:EA = 10:1) afforded product **11** (57.9 mg, 89%) as a yellow solid (m.p. 112.5-114.5 °C).

<sup>1</sup>H NMR (400 MHz, CDCl<sub>3</sub>) δ 8.44 (s, 1H), 7.74 (d, *J* = 8.0 Hz, 1H), 7.62 (dd, *J* = 8.2, 1.4 Hz, 2H), 7.56-7.51 (m, 3H), 7.44-7.32 (m, 4H), 7.30-7.25 (m, 2H), 7.19-7.14 (m, 1H), 7.00-6.92 (m, 2H), 3.93 (s, 3H). <sup>13</sup>C NMR (101 MHz, CDCl<sub>3</sub>) δ 156.7, 136.5, 134.8, 133.3, 130.2, 128.9, 128.7, 128.2, 126.5, 126.2, 126.0, 123.5, 121.8, 120.9, 120.4, 119.7, 118.4, 118.2, 111.0, 110.7, 55.6. HRMS *m/z* (ESI) calcd for C<sub>23</sub>H<sub>19</sub>NO (M+H)<sup>+</sup> 326.1539, found 326.1533.

#### **(E)-2-(2-Chlorostyryl)-3-phenyl-1H-indole (12)**

Product **12** was synthesized in accordance with the typical procedure. Purification using flash column chromatography on silica gel (PE:EA = 10:1) afforded product **12** (61.8 mg, 94%) as a yellow solid (m.p. 154.5-156.5 °C).

<sup>1</sup>H NMR (400 MHz, CDCl<sub>3</sub>) δ 8.41 (s, 1H), 7.74 (d, *J* = 7.0 Hz, 1H), 7.63-7.52 (m, 6H), 7.45-7.39 (m, 2H), 7.33-7.26 (m, 3H), 7.23-7.09 (m, 3H). <sup>13</sup>C NMR (101 MHz, CDCl<sub>3</sub>) δ 136.7, 135.0, 134.5, 133.2, 132.4, 130.3, 130.0, 128.8, 128.7, 128.2, 127.1, 126.8, 126.3, 124.0, 122.9, 120.6,



120.4, 120.0, 119.8, 110.9. HRMS  $m/z$  (ESI) calcd for  $C_{22}H_{16}ClN$  (M+H)<sup>+</sup> 330.1044, found 330.1044.

#### **(E)-2-(2-Bromostyryl)-3-phenyl-1H-indole (13)**

Product **13** was synthesized in accordance with the typical procedure. Purification using flash column chromatography on silica gel (PE:EA = 10:1) afforded product **13** (70.8 mg, 95%) as a yellow solid (m.p. 153.5-155.5 °C).

<sup>1</sup>H NMR (400 MHz, CDCl<sub>3</sub>)  $\delta$  8.43 (s, 1H), 7.73 (d,  $J$  = 8.9 Hz, 1H), 7.61-7.51 (m, 5H), 7.42 (dddd,  $J$  = 7.2, 5.4, 2.8, 1.2 Hz, 3H), 7.36-7.28 (m, 2H), 7.27-7.15 (m, 4H). <sup>13</sup>C NMR (101 MHz, CDCl<sub>3</sub>)  $\delta$  136.7, 134.9, 134.5, 133.2, 132.4, 130.3, 130.0, 128.8, 128.7, 128.1, 127.1, 126.8, 126.3, 124.0, 122.9, 120.6, 120.3, 119.9, 119.7, 110.9. HRMS  $m/z$  (ESI) calcd for  $C_{22}H_{16}BrN$  (M+H)<sup>+</sup> 374.0539, found 374.0544.

#### **(E)-2-(2-Nitrostyryl)-3-phenyl-1H-indole (14)**

Product **14** was synthesized in accordance with the typical procedure. Purification using flash column chromatography on silica gel (PE:EA = 10:1) afforded product **14** (56.4 mg, 83%) as a yellow solid (m.p. 138.5-140.5 °C).

<sup>1</sup>H NMR (400 MHz, CDCl<sub>3</sub>)  $\delta$  8.56 (s, 1H), 7.98 (dd,  $J$  = 8.2, 1.3 Hz, 1H), 7.72-7.66 (m, 2H), 7.58-7.49 (m, 6H), 7.44-7.34 (m, 3H), 7.31-7.24 (m, 2H), 7.18-7.13 (m, 1H). <sup>13</sup>C NMR (101 MHz, CDCl<sub>3</sub>)  $\delta$  147.7, 136.8, 134.3, 133.3, 132.7, 131.8, 130.3, 128.8, 128.0, 127.9, 127.8, 126.9, 125.1, 124.5, 123.1, 121.2, 120.9, 120.7, 120.1, 111.1. HRMS  $m/z$  (ESI) calcd for  $C_{22}H_{16}N_2O_2$  (M+H)<sup>+</sup> 341.1285, found 341.1291.

#### **(E)-2-(3-Methylstyryl)-3-phenyl-1H-indole (15)**

Product **15** was synthesized in accordance with the typical procedure. Purification using flash column chromatography on silica gel (PE:EA = 10:1) afforded product **15** (58.7 mg, 95%) as a yellow solid (m.p. 159.5-161.5 °C).

<sup>1</sup>H NMR (400 MHz, CDCl<sub>3</sub>)  $\delta$  8.31 (s, 1H), 7.76 (d,  $J$  = 8.0 Hz, 1H), 7.62 (dd,  $J$  = 8.2, 1.5 Hz, 2H), 7.56 (t,  $J$  = 7.6 Hz, 2H), 7.46-7.39 (m, 2H), 7.31-7.24 (m, 5H), 7.21-7.17 (m, 1H), 7.14-7.09 (m, 1H), 6.90 (d,  $J$  = 16.5 Hz, 1H), 2.39 (s, 3H). <sup>13</sup>C NMR (101 MHz, CDCl<sub>3</sub>)  $\delta$  138.5, 136.9, 136.5, 134.7, 132.7, 130.2, 128.8, 128.7, 128.3, 127.6, 127.1, 126.6, 123.8, 123.6, 120.5, 119.8, 118.7, 117.8, 110.8, 21.5. HRMS  $m/z$  (ESI) calcd for  $C_{23}H_{19}N$  (M+H)<sup>+</sup> 310.1590, found 310.1583.

#### **(E)-2-(3-Fluorostyryl)-3-phenyl-1H-indole (16)**

Product **16** was synthesized in accordance with the typical procedure. Purification using flash column chromatography on silica gel (PE:EA = 10:1) afforded product **16** (60.1 mg, 96%) as a yellow solid (m.p. 156.5-157.5 °C).

<sup>1</sup>H NMR (400 MHz, CDCl<sub>3</sub>)  $\delta$  8.30 (s, 1H), 7.73 (d,  $J$  = 8.0 Hz, 1H), 7.61-7.52 (m, 4H), 7.45-7.38 (m, 2H), 7.36-7.23 (m, 3H), 7.22-7.17 (m, 2H), 7.16-7.12 (m, 1H), 6.96 (td,  $J$  = 8.3, 7.9, 2.2 Hz, 1H), 6.85 (d,  $J$  = 16.5 Hz, 1H). <sup>13</sup>C NMR (101 MHz, CDCl<sub>3</sub>)  $\delta$  164.5, 162.1, 139.4, 139.4, 136.6, 134.4, 130.4, 130.2, 128.9, 128.2, 126.8, 126.0, 126.0, 123.9, 122.4, 122.3, 120.7, 119.9, 119.6, 119.3, 114.7, 114.4, 112.8, 112.6, 110.9. <sup>19</sup>F NMR (376 MHz, CDCl<sub>3</sub>)  $\delta$  -112.9. HRMS  $m/z$  (ESI) calcd for  $C_{22}H_{16}FN$  (M+H)<sup>+</sup> 314.1340, found 314.1340.

#### **(E)-2-(3-Chlorostyryl)-3-phenyl-1H-indole (17)**

Product **17** was synthesized in accordance with the typical procedure. Purification using flash column chromatography on silica gel (PE:EA = 10:1) afforded product **17** (62.5 mg, 95%) as a

yellow solid (m.p. 124.5-126.5 °C).

<sup>1</sup>H NMR (400 MHz, CDCl<sub>3</sub>) δ 8.28 (s, 1H), 7.74 (d, *J* = 8.0 Hz, 1H), 7.61-7.53 (m, 4H), 7.46-7.37 (m, 3H), 7.32-7.28 (m, 2H), 7.27-7.21 (m, 3H), 7.20-7.16 (m, 1H), 6.80 (d, *J* = 16.5 Hz, 1H). <sup>13</sup>C NMR (101 MHz, CDCl<sub>3</sub>) δ 138.9, 136.6, 134.8, 134.4, 132.1, 130.2, 130.1, 128.9, 128.2, 127.6, 126.8, 126.2, 125.8, 124.6, 124.0, 120.7, 119.9, 119.7, 119.3, 110.9. HRMS *m/z* (ESI) calcd for C<sub>22</sub>H<sub>16</sub>ClN (M+H)<sup>+</sup> 330.1044, found 330.1037.

#### **(*E*)-3-Phenyl-2-(3-(trifluoromethyl)styryl)-1*H*-indole (18)**

Product **18** was synthesized in accordance with the typical procedure. Purification using flash column chromatography on silica gel (PE:EA = 10:1) afforded product **18** (55.2 mg, 76%) as a yellow solid (m.p. 110.5-112.5 °C).

<sup>1</sup>H NMR (400 MHz, CDCl<sub>3</sub>) δ 8.32 (s, 1H), 7.75 (d, *J* = 8.0 Hz, 1H), 7.66 (s, 1H), 7.61-7.50 (m, 6H), 7.47-7.39 (m, 3H), 7.34-7.27 (m, 2H), 7.19 (ddd, *J* = 8.0, 6.9, 1.0 Hz, 1H), 6.89 (d, *J* = 16.5 Hz, 1H). <sup>13</sup>C NMR (101 MHz, CDCl<sub>3</sub>) δ 137.8, 136.7, 134.4, 131.9, 131.4, 131.1, 130.2, 129.3, 129.2, 128.9, 128.2, 126.9, 125.7, 125.6, 124.2, 123.3, 122.9, 120.7, 120.05, 119.9, 119.7, 110.9. <sup>19</sup>F NMR (376 MHz, CDCl<sub>3</sub>) δ -62.5. HRMS *m/z* (ESI) calcd for C<sub>23</sub>H<sub>16</sub>F<sub>3</sub>N (M+Na)<sup>+</sup> 386.1127, found 386.1124.

#### **(*E*)-2-(4-Methylstyryl)-3-phenyl-1*H*-indole (19)**

Product **19** was synthesized in accordance with the typical procedure. Purification using flash column chromatography on silica gel (PE:EA = 10:1) afforded product **19** (58.7 mg, 95%) as a yellow solid (m.p. 110.50-112.5 °C).

<sup>1</sup>H NMR (400 MHz, CDCl<sub>3</sub>) δ 8.29 (s, 1H), 7.76 (d, *J* = 8.0 Hz, 1H), 7.65-7.60 (m, 2H), 7.56 (t, *J* = 7.7 Hz, 2H), 7.45-7.36 (m, 4H), 7.30 (t, *J* = 7.0 Hz, 1H), 7.19 (td, *J* = 7.2, 3.9 Hz, 4H), 6.91 (d, *J* = 16.5 Hz, 1H), 2.40 (s, 3H). <sup>13</sup>C NMR (101 MHz, CDCl<sub>3</sub>) δ 137.8, 136.5, 134.7, 134.2, 132.8, 130.2, 129.6, 128.8, 128.3, 127.5, 126.6, 126.4, 123.5, 120.5, 119.7, 118.4, 117.0, 110.8, 21.4. The NMR spectra are consistent with the reported literature.<sup>3</sup>

#### **(*E*)-2-(4-Methoxystyryl)-3-phenyl-1*H*-indole (20)**

Product **20** was synthesized in accordance with the typical procedure. Purification using flash column chromatography on silica gel (PE:EA = 10:1) afforded product **20** (61.7 mg, 95%) as a yellow solid (m.p. 114.5-116.5 °C).

<sup>1</sup>H NMR (400 MHz, CDCl<sub>3</sub>) δ 8.31 (s, 1H), 7.73 (d, *J* = 8.0 Hz, 1H), 7.62-7.59 (m, 2H), 7.54 (t, *J* = 7.8 Hz, 2H), 7.43-7.37 (m, 4H), 7.27 (t, *J* = 7.0 Hz, 1H), 7.19-7.11 (m, 2H), 6.92-6.85 (m, 3H), 3.84 (s, 3H). <sup>13</sup>C NMR (101 MHz, CDCl<sub>3</sub>) δ 159.5, 136.5, 134.8, 133.0, 130.2, 129.8, 128.8, 128.4, 127.8, 127.1, 126.5, 123.4, 120.5, 119.6, 118.1, 115.9, 114.3, 110.7, 55.4. HRMS *m/z* (ESI) calcd for C<sub>23</sub>H<sub>19</sub>NO (M+H)<sup>+</sup> 326.1539, found 326.1537.

#### **(*E*)-*N,N*-Dimethyl-4-[2-(3-phenyl-1*H*-indol-2-yl)vinyl]aniline (21)**

Product **21** was synthesized in accordance with the typical procedure. Purification using flash column chromatography on silica gel (PE:EA = 10:1) afforded product **21** (41.9 mg, 62%) as a yellow solid (m.p. 133.5-135.5 °C).

<sup>1</sup>H NMR (400 MHz, CDCl<sub>3</sub>) δ 8.28 (s, 1H), 7.75 (d, *J* = 7.9 Hz, 1H), 7.64 (d, *J* = 6.7 Hz, 2H), 7.56 (t, *J* = 7.7 Hz, 2H), 7.44-7.36 (m, 4H), 7.27 (t, *J* = 7.5 Hz, 1H), 7.21-7.05 (m, 2H), 6.88 (d, *J* = 16.4 Hz, 1H), 6.73 (d, *J* = 8.5 Hz, 2H), 3.00 (s, 6H). <sup>13</sup>C NMR (101 MHz, CDCl<sub>3</sub>) δ 150.2, 136.4, 135.0, 133.6, 130.2, 128.7, 128.4, 127.9, 127.6, 126.3, 125.4, 123.0, 120.3, 119.4, 117.1, 113.7,

112.6, 110.6, 40.5. HRMS  $m/z$  (ESI) calcd for  $C_{24}H_{22}N_2$  (M+H)<sup>+</sup> 339.1856, found 339.1849.

**(E)-2-(4-Fluorostyryl)-3-phenyl-1H-indole (22)**

Product **22** was synthesized in accordance with the typical procedure. Purification using flash column chromatography on silica gel (PE:EA = 10:1) afforded product **22** (56.9 mg, 91%) as a yellow solid (m.p. 114.5-116.5 °C).

<sup>1</sup>H NMR (400 MHz, CDCl<sub>3</sub>)  $\delta$  8.27 (s, 1H), 7.74 (d,  $J$  = 8.0 Hz, 1H), 7.61-7.52 (m, 4H), 7.45-7.36 (m, 4H), 7.29 (d,  $J$  = 15.1 Hz, 1H), 7.20-7.13 (m, 2H), 7.05 (t,  $J$  = 8.6 Hz, 2H), 6.85 (d,  $J$  = 16.5 Hz, 1H). <sup>13</sup>C NMR (101 MHz, CDCl<sub>3</sub>)  $\delta$  163.7 161.2, 136.5, 134.6, 133.2, 133.2, 132.5, 130.2, 128.8, 128.3, 128.0, 127.9, 126.7, 126.2, 123.7, 120.6, 119.8, 118.9, 117.7, 115.9, 115.7, 110.8. <sup>19</sup>F NMR (376 MHz, CDCl<sub>3</sub>)  $\delta$  -113.6. HRMS  $m/z$  (ESI) calcd for  $C_{22}H_{16}FN$  (M+H)<sup>+</sup> 314.1340, found 314.1331.

**(E)-2-(4-Chlorostyryl)-3-phenyl-1H-indole (23)**

Product **23** was synthesized in accordance with the typical procedure. Purification using flash column chromatography on silica gel (PE:EA = 10:1) afforded product **23** (57.9 mg, 88%) as a yellow solid (m.p. 130.5-132.5 °C).

<sup>1</sup>H NMR (400 MHz, CDCl<sub>3</sub>)  $\delta$  8.30 (s, 1H), 7.72 (d,  $J$  = 7.6 Hz, 1H), 7.59-7.51 (m, 4H), 7.44-7.33 (m, 4H), 7.32-7.26 (m, 3H), 7.23-7.14 (m, 2H), 6.84 (d,  $J$  = 16.5 Hz, 1H). <sup>13</sup>C NMR (101 MHz, CDCl<sub>3</sub>)  $\delta$  136.6, 135.5, 134.5, 133.3, 132.3, 130.2, 129.0, 128.8, 128.2, 127.6, 126.8, 125.9, 123.9, 120.6, 119.9, 119.4, 118.6, 110.8. HRMS  $m/z$  (ESI) calcd for  $C_{22}H_{16}ClN$  (M+H)<sup>+</sup> 330.1044, found 330.1041.

**(E)-2-(4-Bromostyryl)-3-phenyl-1H-indole (24)**

Product **24** was synthesized in accordance with the typical procedure. Purification using flash column chromatography on silica gel (PE:EA = 10:1) afforded product **24** (62.8 mg, 84%) as a yellow solid (m.p. 126.5-128.5 °C).

<sup>1</sup>H NMR (400 MHz, CDCl<sub>3</sub>)  $\delta$  8.22 (s, 1H), 7.74 (d,  $J$  = 8.0 Hz, 1H), 7.60-7.53 (m, 4H), 7.48-7.40 (m, 3H), 7.35 (d,  $J$  = 8.1 Hz, 1H), 7.30 (t,  $J$  = 6.9 Hz, 2H), 7.25-7.15 (m, 3H), 6.77 (d,  $J$  = 16.5 Hz, 1H). <sup>13</sup>C NMR (101 MHz, CDCl<sub>3</sub>)  $\delta$  136.6, 135.9, 134.5, 132.3, 131.9, 130.2, 128.8, 128.2, 127.8, 126.8, 126.0, 123.9, 121.4, 120.6, 119.9, 119.3, 118.6, 110.9. HRMS  $m/z$  (ESI) calcd for  $C_{22}H_{16}BrN$  (M+H)<sup>+</sup> 374.0539, found 374.0545.

**(E)-3-Phenyl-2-(1-phenylprop-1-en-2-yl)-1H-indole (25)**

Product **25** was synthesized in accordance with the typical procedure. Purification using flash column chromatography on silica gel (PE:EA = 10:1) afforded product **25** (54.4 mg, 76%) as a yellow oil.

<sup>1</sup>H NMR (400 MHz, CDCl<sub>3</sub>)  $\delta$  8.18 (s, 1H), 7.70 (d,  $J$  = 7.9 Hz, 1H), 7.61-7.58 (m, 2H), 7.49-7.45 (m, 2H), 7.44-7.31 (m, 7H), 7.30-7.25 (m, 2H), 7.18 (ddd,  $J$  = 8.0, 7.0, 1.1 Hz, 1H), 6.87 (s, 1H), 2.14 (d,  $J$  = 1.4 Hz, 3H). <sup>13</sup>C NMR (101 MHz, CDCl<sub>3</sub>)  $\delta$  137.5, 137.4, 135.7, 135.2, 130.5, 130.5, 130.1, 129.2, 128.8, 128.5, 128.4, 127.0, 126.4, 122.7, 120.4, 119.5, 115.2, 110.8, 18.2. HRMS  $m/z$  (ESI) calcd for  $C_{23}H_{19}N$  (M+H)<sup>+</sup> 310.1590, found 310.1586.

**(Z)-2-(1-Chloro-2-phenylvinyl)-3-phenyl-1H-indole (26)**

Product **26** was synthesized in accordance with the typical procedure. Purification using flash column chromatography on silica gel (PE:EA = 10:1) afforded product **26** (57.2 mg, 87%) as a yellow oil.

<sup>1</sup>H NMR (400 MHz, CDCl<sub>3</sub>) δ 8.58 (s, 1H), 7.67-7.60 (m, 3H), 7.54-7.48 (m, 4H), 7.44 (dt, *J* = 8.1, 0.9 Hz, 1H), 7.41-7.35 (m, 3H), 7.34-7.29 (m, 2H), 7.19 (ddd, *J* = 8.1, 7.0, 1.0 Hz, 1H), 6.84 (s, 1H). <sup>13</sup>C NMR (101 MHz, CDCl<sub>3</sub>) δ 135.2, 134.7, 131.3, 130.3, 129.6, 129.4, 128.9, 128.9, 128.4, 128.3, 127.0, 123.8, 122.3, 120.8, 120.1, 116.9, 111.2. HRMS *m/z* (ESI) calcd for C<sub>22</sub>H<sub>16</sub>ClN (M+Na)<sup>+</sup> 352.0863, found 352.0867.

#### **(Z)-2-(1-Bromo-2-phenylvinyl)-3-phenyl-1H-indole (27)**

Product **27** was synthesized in accordance with the typical procedure. Purification using flash column chromatography on silica gel (PE:EA = 10:1) afforded product **27** (70.8 mg, 95%) as a yellow oil.

<sup>1</sup>H NMR (400 MHz, CDCl<sub>3</sub>) δ 8.34 (s, 1H), 7.73 (d, *J* = 7.9 Hz, 1H), 7.61-7.58 (m, 2H), 7.54 (t, *J* = 7.7 Hz, 2H), 7.48-7.45 (m, 2H), 7.43-7.34 (m, 4H), 7.29 (td, *J* = 4.8, 4.3, 2.2 Hz, 2H), 7.16 (ddd, *J* = 8.0, 7.0, 1.0 Hz, 1H), 6.93 (d, *J* = 16.5 Hz, 1H). <sup>13</sup>C NMR (101 MHz, CDCl<sub>3</sub>) δ 137.0, 136.6, 134.6, 132.6, 130.3, 128.9, 128.8, 128.3, 127.9, 127.4, 126.8, 126.5, 123.7, 120.6, 119.8, 118.9, 118.1, 110.8. HRMS *m/z* (ESI) calcd for C<sub>22</sub>H<sub>16</sub>BrN (M+Na)<sup>+</sup> 396.0358, found 396.0360.

#### **(E)-2-[2-(Furan-2-yl)vinyl]-3-phenyl-1H-indole (28)**

Product **28** was synthesized in accordance with the typical procedure. Purification using flash column chromatography on silica gel (PE:EA = 10:1) afforded product **28** (28.5 mg, 50%) as a yellow solid (m.p. 131.5-133.5 °C).

<sup>1</sup>H NMR (400 MHz, CDCl<sub>3</sub>) δ 8.23 (s, 1H), 7.70 (d, *J* = 8.0 Hz, 1H), 7.61-7.49 (m, 4H), 7.43-7.34 (m, 3H), 7.26 (dd, *J* = 15.1, 1.2 Hz, 1H), 7.20-7.11 (m, 2H), 6.72 (d, *J* = 16.4 Hz, 1H), 6.48-6.31 (m, 2H). <sup>13</sup>C NMR (101 MHz, CDCl<sub>3</sub>) δ 153.0, 142.5, 136.6, 134.5, 132.4, 130.2, 128.8, 128.4, 126.7, 123.7, 120.7, 119.8, 119.1, 116.4, 115.3, 111.9, 110.7, 108.8. HRMS *m/z* (ESI) calcd for C<sub>20</sub>H<sub>15</sub>NO (M+H)<sup>+</sup> 286.1226, found 286.1217.

#### **(E)-2-[2-(Anthracen-9-yl)vinyl]-3-phenyl-1H-indole (29)**

Product **29** was synthesized in accordance with the typical procedure. Purification using flash column chromatography on silica gel (PE:EA = 10:1) afforded product **29** (72.7 mg, 92%) as a yellow solid (m.p. 172.5-174.5 °C).

<sup>1</sup>H NMR (400 MHz, CDCl<sub>3</sub>) δ 8.43 (d, *J* = 10.1 Hz, 2H), 8.36-8.31 (m, 2H), 8.07-8.02 (m, 2H), 7.85 (d, *J* = 8.0 Hz, 1H), 7.64-7.60 (m, 2H), 7.54-7.38 (m, 9H), 7.31 (dd, *J* = 17.5, 7.8 Hz, 2H), 7.12 (d, *J* = 16.7 Hz, 1H). <sup>13</sup>C NMR (101 MHz, CDCl<sub>3</sub>) δ 136.5, 134.3, 132.3, 132.1, 131.53, 130.1, 129.7, 128.9, 128.7, 128.2, 126.9, 126.7, 126.6, 125.9, 125.8, 125.3, 123.9, 123.5, 120.7, 120.1, 118.9, 110.9. HRMS *m/z* (ESI) calcd for C<sub>30</sub>H<sub>21</sub>N (M+Na)<sup>+</sup> 418.1566, found 418.1575.

#### **(E)-3-Phenyl-2-(prop-1-en-1-yl)-1H-indole (30)**

Product **30** was synthesized in accordance with the typical procedure. Purification using flash column chromatography on silica gel (PE:EA = 10:1) afforded product **30** (35.4 mg, 76%) as a yellow oil.

<sup>1</sup>H NMR (400 MHz, CDCl<sub>3</sub>) δ 8.17 (s, 1H), 7.69 (d, *J* = 8.0 Hz, 1H), 7.56 (dd, *J* = 8.2, 1.4 Hz, 2H), 7.53-7.48 (m, 2H), 7.39-7.34 (m, 2H), 7.26-7.21 (m, 1H), 7.13 (ddd, *J* = 8.1, 7.0, 1.1 Hz, 1H), 6.61 (dq, *J* = 16.0, 1.7 Hz, 1H), 6.09 (dq, *J* = 16.1, 6.7 Hz, 1H), 1.93 (dd, *J* = 6.7, 1.8 Hz, 3H). <sup>13</sup>C NMR (101 MHz, CDCl<sub>3</sub>) δ 136.1, 134.9, 132.7, 130.1, 128.6, 128.3, 126.3, 125.1, 122.9, 121.1, 120.3, 119.6, 116.1, 110.6, 18.8. HRMS *m/z* (ESI) calcd for C<sub>17</sub>H<sub>15</sub>N (M+H)<sup>+</sup> 256.1097, found 256.1100.

### **(E)-2-(But-1-en-1-yl)-3-phenyl-1H-indole (31)**

Product **31** was synthesized in accordance with the typical procedure. Purification using flash column chromatography on silica gel (PE:EA = 10:1) afforded product **31** (29.6 mg, 60%) as a yellow oil.

<sup>1</sup>H NMR (400 MHz, CDCl<sub>3</sub>) δ 8.20 (s, 1H), 7.67 (d, *J* = 7.9 Hz, 1H), 7.56-7.46 (m, 4H), 7.35 (t, *J* = 6.5 Hz, 2H), 7.22 (td, *J* = 8.1, 7.6, 1.2 Hz, 1H), 7.13-7.09 (m, 1H), 6.59 (dt, *J* = 16.1, 1.7 Hz, 1H), 6.13 (ddt, *J* = 16.0, 8.3, 4.1 Hz, 1H), 2.28 (p, *J* = 7.5 Hz, 2H), 1.10 (td, *J* = 7.4, 1.7 Hz, 3H). <sup>13</sup>C NMR (101 MHz, CDCl<sub>3</sub>) δ 136.1, 134.9, 132.7, 132.1, 130.1, 128.6, 128.3, 126.3, 122.9, 120.3, 119.6, 119.0, 116.3, 110.6, 26.4, 13.9. HRMS *m/z* (ESI) calcd for C<sub>20</sub>H<sub>21</sub>N (M+H)<sup>+</sup> 248.1434, found 248.1439.

### **(E)-2-(Pent-1-en-1-yl)-3-phenyl-1H-indole (32)**

Product **32** was synthesized in accordance with the typical procedure. Purification using flash column chromatography on silica gel (PE:EA = 10:1) afforded product **32** (26.6 mg, 51%) as a yellow oil.

<sup>1</sup>H NMR (400 MHz, CDCl<sub>3</sub>) δ 8.25 (s, 1H), 7.69 (d, *J* = 8.0 Hz, 1H), 7.59-7.47 (m, 5H), 7.39-7.35 (m, 2H), 7.25-7.21 (m, 1H), 7.15-7.11 (m, 1H), 6.60 (dt, *J* = 16.1, 1.5 Hz, 1H), 6.09 (dt, *J* = 16.1, 6.9 Hz, 1H), 2.24 (qd, *J* = 7.2, 1.5 Hz, 2H), 1.52 (q, *J* = 7.4 Hz, 2H), 0.98 (t, *J* = 7.4 Hz, 3H). <sup>13</sup>C NMR (101 MHz, CDCl<sub>3</sub>) δ 136.1, 134.9, 132.7, 130.4, 130.1, 128.6, 128.3, 126.3, 122.9, 120.2, 120.0, 119.5, 116.2, 110.6, 35.4, 22.7, 13.8. HRMS *m/z* (ESI) calcd for C<sub>19</sub>H<sub>19</sub>N (M+H)<sup>+</sup> 262.1590, found 262.1593.

### **(E)-2-(Hex-1-en-1-yl)-3-phenyl-1H-indole (33)**

Product **33** was synthesized in accordance with the typical procedure. Purification using flash column chromatography on silica gel (PE:EA = 10:1) afforded product **33** (24.2 mg, 44%) as a yellow oil.

<sup>1</sup>H NMR (400 MHz, CDCl<sub>3</sub>) δ 8.22 (s, 1H), 7.69 (dd, *J* = 8.0, 1.1 Hz, 1H), 7.57-7.54 (m, 2H), 7.53-7.49 (m, 2H), 7.39-7.34 (m, 2H), 7.23 (ddd, *J* = 8.1, 7.0, 1.2 Hz, 1H), 6.60 (dt, *J* = 16.1, 1.5 Hz, 1H), 6.09 (dt, *J* = 16.1, 7.0 Hz, 1H), 2.26 (qd, *J* = 7.1, 1.5 Hz, 2H), 1.50-1.38 (m, 4H), 0.95 (t, *J* = 7.2 Hz, 3H). <sup>13</sup>C NMR (101 MHz, CDCl<sub>3</sub>) δ 136.1, 134.9, 132.7, 130.7, 130.1, 128.6, 128.3, 126.3, 122.9, 120.2, 119.8, 119.5, 116.2, 110.6, 33.0, 31.7, 22.4, 14.1. HRMS *m/z* (ESI) calcd for C<sub>20</sub>H<sub>21</sub>N (M+H)<sup>+</sup> 276.1747, found 276.1742.

### **(E)-2-(Hept-1-en-1-yl)-3-phenyl-1H-indole (34)**

Product **34** was synthesized in accordance with the typical procedure. Purification using flash column chromatography on silica gel (PE:EA = 10:1) afforded product **34** (24.3 mg, 42%) as a yellow oil.

<sup>1</sup>H NMR (400 MHz, CDCl<sub>3</sub>) δ 8.20 (s, 1H), 7.70 (d, *J* = 7.9 Hz, 1H), 7.59-7.55 (m, 2H), 7.53-7.49 (m, 2H), 7.39-7.35 (m, 2H), 7.26-7.22 (m, 1H), 7.14 (ddd, *J* = 8.1, 7.0, 1.1 Hz, 1H), 6.60 (dt, *J* = 16.1, 1.5 Hz, 1H), 6.09 (dt, *J* = 16.1, 7.0 Hz, 1H), 2.26 (qd, *J* = 7.1, 1.5 Hz, 2H), 1.50 (dt, *J* = 14.0, 7.1 Hz, 2H), 1.39-1.34 (m, 4H), 0.97-0.92 (m, 3H). <sup>13</sup>C NMR (101 MHz, CDCl<sub>3</sub>) δ 136.1, 134.9, 132.7, 130.7, 130.1, 128.6, 128.3, 126.3, 122.9, 120.2, 119.8, 119.5, 116.2, 110.6, 33.3, 31.5, 29.2, 22.6, 14.2. HRMS *m/z* (ESI) calcd for C<sub>21</sub>H<sub>23</sub>N (M+H)<sup>+</sup> 290.1903, found 290.1904.

### **2-(2-Methylprop-1-en-1-yl)-3-phenyl-1H-indole (35)**

Product **35** was synthesized in accordance with the typical procedure. Purification using flash

column chromatography on silica gel (PE:EA = 10:1) afforded product **35** (43.5 mg, 88%) as a yellow oil.

$^1\text{H}$  NMR (400 MHz,  $\text{CDCl}_3$ )  $\delta$  8.12 (s, 1H), 7.77 (dq,  $J = 7.9, 0.8$  Hz, 1H), 7.61-7.57 (m, 2H), 7.51-7.46 (m, 2H), 7.40 (dt,  $J = 8.0, 1.0$  Hz, 1H), 7.35-7.31 (m, 1H), 7.24 (ddd,  $J = 8.1, 7.1, 1.3$  Hz, 1H), 7.17 (ddd,  $J = 8.1, 7.1, 1.1$  Hz, 1H), 6.32 (p,  $J = 1.4$  Hz, 1H), 1.96 (dd,  $J = 8.3, 1.3$  Hz, 6H).  $^{13}\text{C}$  NMR (101 MHz,  $\text{CDCl}_3$ )  $\delta$  137.0, 135.8, 135.6, 132.9, 129.8, 128.5, 127.5, 125.9, 122.3, 120.3, 119.4, 116.0, 115.8, 110.7, 27.1, 20.4. HRMS  $m/z$  (ESI) calcd for  $\text{C}_{18}\text{H}_{17}\text{N}$  ( $\text{M}+\text{H}$ ) $^+$  248.1434, found 248.1444.

### 2-(Cyclohex-1-en-1-yl)-3-phenyl-1H-indole (36)

Product **36** was synthesized in accordance with the typical procedure. Purification using flash column chromatography on silica gel (PE:EA = 10:1) afforded product **36** (52.4 mg, 96%) as a yellow oil.

$^1\text{H}$  NMR (400 MHz,  $\text{CDCl}_3$ )  $\delta$  8.02 (s, 1H), 7.65 (dq,  $J = 7.9, 0.8$  Hz, 1H), 7.58-7.54 (m, 2H), 7.48-7.43 (m, 2H), 7.38-7.31 (m, 2H), 7.23 (ddd,  $J = 8.2, 7.0, 1.2$  Hz, 1H), 7.14 (ddd,  $J = 8.1, 7.0, 1.1$  Hz, 1H), 6.09 (tt,  $J = 3.8, 1.7$  Hz, 1H), 2.24-2.15 (m, 4H), 1.67 (p,  $J = 3.2$  Hz, 4H).  $^{13}\text{C}$  NMR (101 MHz,  $\text{CDCl}_3$ )  $\delta$  136.6, 136.0, 134.9, 131.1, 129.9, 128.8, 128.5, 128.3, 126.1, 122.2, 120.1, 119.3, 113.7, 110.6, 27.8, 25.8, 22.8, 22.1. HRMS  $m/z$  (ESI) calcd for  $\text{C}_{20}\text{H}_{19}\text{N}$  ( $\text{M}+\text{Na}$ ) $^+$  296.1410, found 296.1410.

### 2-(1E,3E-penta-1,3-dien-1-yl)-3-phenyl-1H-indole (37)

Product **37** was synthesized in accordance with the typical procedure. Purification using flash column chromatography on silica gel (PE:EA = 10:1) afforded product **37** (34.7 mg, 67%) as a yellow oil.

$^1\text{H}$  NMR (400 MHz,  $\text{CDCl}_3$ )  $\delta$  8.23 (s, 1H), 7.66 (dq,  $J = 8.0, 0.9$  Hz, 1H), 7.55-7.52 (m, 2H), 7.5-7.48 (m, 2H), 7.36-7.34 (m, 2H), 7.24-7.22 (m, 1H), 7.13-7.10 (m, 1H), 6.59 (d,  $J = 6.4$  Hz, 2H), 6.26-6.17 (m, 1H), 5.85 (dq,  $J = 15.0, 6.8$  Hz, 1H), 1.83 (dd,  $J = 6.8, 1.6$  Hz, 3H).  $^{13}\text{C}$  NMR (101 MHz,  $\text{CDCl}_3$ )  $\delta$  136.5, 134.8, 132.9, 131.8, 130.7, 130.2, 128.7, 128.3, 126.5, 123.3, 121.0, 120.4, 119.6, 119.1, 117.9, 110.6, 18.6. HRMS  $m/z$  (ESI) calcd for  $\text{C}_{19}\text{H}_{17}\text{N}$  ( $\text{M}+\text{H}$ ) $^+$  260.1434, found 260.1403.

### 2-(1E,3E-hexa-1,3-dien-1-yl)-3-phenyl-1H-indole (38)

Product **38** was synthesized in accordance with the typical procedure. Purification using flash column chromatography on silica gel (PE:EA = 10:1) afforded product **38** (20.4 mg, 43%) as a yellow oil.

$^1\text{H}$  NMR (400 MHz,  $\text{CDCl}_3$ )  $\delta$  8.22 (s, 1H), 7.66 (d,  $J = 6.9$  Hz, 1H), 7.53 (dd,  $J = 8.3, 1.5$  Hz, 2H), 7.50-7.46 (m, 2H), 7.37-7.34 (m, 2H), 7.22 (ddd,  $J = 8.2, 7.0, 1.2$  Hz, 1H), 7.10 (ddd,  $J = 8.0, 7.1, 1.1$  Hz, 1H), 6.60 (d,  $J = 7.1$  Hz, 2H), 6.24-6.16 (m, 1H), 5.89 (dt,  $J = 15.1, 6.6$  Hz, 1H), 2.23-2.13 (m, 2H), 1.05 (t,  $J = 7.4$  Hz, 3H).  $^{13}\text{C}$  NMR (101 MHz,  $\text{CDCl}_3$ )  $\delta$  137.8, 136.5, 134.8, 132.9, 130.2, 129.5, 128.7, 128.5, 128.4, 126.5, 123.3, 120.4, 119.6, 119.3, 117.9, 110.6, 26.0, 13.6. HRMS  $m/z$  (ESI) calcd for  $\text{C}_{20}\text{H}_{19}\text{N}$  ( $\text{M}+\text{H}$ ) $^+$  274.1590, found 274.1588.

### 2-(1E,3E-hepta-1,3-dien-1-yl)-3-phenyl-1H-indole (39)

Product **39** was synthesized in accordance with the typical procedure. Purification using flash column chromatography on silica gel (PE:EA = 10:1) afforded product **39** (21.8 mg, 38%) as a yellow oil.

<sup>1</sup>H NMR (300 MHz, CDCl<sub>3</sub>) δ 8.20 (s, 1H), 7.66 (d, *J* = 7.9 Hz, 1H), 7.55-7.46 (m, 4H), 7.38-7.32 (m, 2H), 7.22 (t, *J* = 7.6 Hz, 1H), 7.14-7.08 (m, 1H), 6.64-6.56 (m, 2H), 6.27-6.15 (m, 1H), 5.84 (dt, *J* = 14.8, 7.0 Hz, 1H), 2.18-2.09 (m, 2H), 1.46 (h, *J* = 7.4 Hz, 2H), 0.94 (t, *J* = 7.4 Hz, 3H). <sup>13</sup>C NMR (76 MHz, CDCl<sub>3</sub>) δ 136.5, 136.2, 134.8, 132.9, 130.6, 130.2, 128.7, 128.5, 128.4, 126.5, 120.4, 119.6, 119.3, 117.9, 110.6, 35.1, 22.6, 13.9. HRMS *m/z* (ESI) calcd for C<sub>20</sub>H<sub>19</sub>N (M+H)<sup>+</sup> 288.1747, found 288.1744.

### 2,3-Diphenyl-1*H*-indole (41)

Product **41** was synthesized in accordance with the typical procedure. Purification using flash column chromatography on silica gel (PE:EA = 10:1) afforded product **41** (33.4 mg, 62%) as a yellow solid (m.p. 125.5-127.5 °C).

<sup>1</sup>H NMR (400 MHz, CDCl<sub>3</sub>) δ 8.24 (s, 1H), 7.70 (d, *J* = 8.0 Hz, 1H), 7.48-7.43 (m, 5H), 7.39 (t, *J* = 7.6 Hz, 2H), 7.35-7.28 (m, 4H), 7.26 (d, *J* = 7.1 Hz, 1H), 7.20-7.14 (m, 1H). <sup>13</sup>C NMR (101 MHz, CDCl<sub>3</sub>) δ 136.1, 135.2, 134.2, 132.8, 130.3, 128.9, 128.8, 128.7, 128.3, 127.8, 126.4, 122.8, 120.6, 119.9, 115.2, 111.0. The NMR spectra are consistent with the reported literature.<sup>2</sup>

### 3-(4-Chlorophenyl)-2-phenyl-1*H*-indole (42)

Product **42** was synthesized in accordance with the typical procedure. Purification using flash column chromatography on silica gel (PE:EA = 10:1) afforded product **42** (32.1 mg, 53%) as a yellow solid (m.p. 136.5-138.5 °C).

<sup>1</sup>H NMR (400 MHz, CDCl<sub>3</sub>) δ 8.23 (s, 1H), 7.68 (d, *J* = 6.7 Hz, 1H), 7.45-7.41 (m, 3H), 7.40-7.32 (m, 7H), 7.29 (ddd, *J* = 8.2, 7.0, 1.2 Hz, 1H), 7.21 (ddd, *J* = 8.0, 7.0, 1.1 Hz, 1H). <sup>13</sup>C NMR (101 MHz, CDCl<sub>3</sub>) δ 135.9, 134.5, 133.7, 132.5, 132.1, 131.5, 130.3, 128.9, 128.5, 128.3, 128.0, 122.9, 120.7, 119.5, 113.8, 111.1. The NMR spectra are consistent with the reported literature.<sup>2</sup>

### 3-(4-Bromophenyl)-2-phenyl-1*H*-indole (43)

Product **43** was synthesized in accordance with the typical procedure. Purification using flash column chromatography on silica gel (PE:EA = 10:1) afforded product **43** (39.6 mg, 57%) as a yellow solid (m.p. 116.5-118.5 °C).

<sup>1</sup>H NMR (400 MHz, CDCl<sub>3</sub>) δ 8.25 (s, 1H), 7.69 (d, *J* = 9.1 Hz, 1H), 7.55-7.51 (m, 2H), 7.46-7.40 (m, 3H), 7.40-7.33 (m, 4H), 7.33-7.27 (m, 2H), 7.23-7.19 (m, 1H). <sup>13</sup>C NMR (101 MHz, CDCl<sub>3</sub>) δ 135.9, 134.5, 134.2, 132.4, 131.8, 128.9, 128.5, 128.3, 128.1, 122.9, 120.8, 120.2, 119.5, 113.8, 111.1. The NMR spectra are consistent with the reported literature.<sup>7</sup>

### 3-phenyl-2-(*o*-tolyl)-1*H*-indole (44)

Product **44** was synthesized in accordance with the typical procedure. Purification using flash column chromatography on silica gel (PE:EA = 10:1) afforded product **44** (54.3 mg, 96%) as a yellow solid (m.p. 162.5-164.5 °C).

<sup>1</sup>H NMR (400 MHz, CDCl<sub>3</sub>) δ 8.08 (s, 1H), 7.91 (d, *J* = 7.9 Hz, 1H), 7.46-7.38 (m, 4H), 7.36-7.22 (m, 8H), 2.05 (s, 3H). <sup>13</sup>C NMR (101 MHz, CDCl<sub>3</sub>) δ 137.7, 135.8, 135.5, 134.5, 132.7, 130.9, 130.6, 129.1, 128.7, 128.5, 127.5, 125.9, 125.8, 122.5, 120.4, 119.7, 115.9, 111.0, 20.1. HRMS *m/z* (ESI) calcd for C<sub>21</sub>H<sub>17</sub>N (M+Na)<sup>+</sup> 306.1253, found 306.1253.

### 2-(2-Methoxyphenyl)-3-phenyl-1*H*-indole (45)

Product **45** was synthesized in accordance with the typical procedure. Purification using flash column chromatography on silica gel (PE:EA = 10:1) afforded product **45** (54.4 mg, 91%) as a yellow solid (m.p. 153.5-155.5 °C).

<sup>1</sup>H NMR (400 MHz, CDCl<sub>3</sub>) δ 9.04 (s, 1H), 7.81 (d, *J* = 7.9 Hz, 1H), 7.56-7.52 (m, 2H), 7.50-7.43 (m, 3H), 7.38-7.29 (m, 4H), 7.26-7.20 (m, 1H), 7.05 (d, *J* = 8.6 Hz, 1H), 6.88 (td, *J* = 7.5, 1.2 Hz, 1H), 3.89 (s, 3H). <sup>13</sup>C NMR (101 MHz, CDCl<sub>3</sub>) δ 156.8, 135.9, 135.5, 132.1, 131.3, 130.2, 129.1, 128.7, 127.9, 126.1, 122.5, 121.0, 120.9, 120.0, 119.5, 115.8, 111.7, 110.9, 55.7. HRMS *m/z* (ESI) calcd for C<sub>21</sub>H<sub>17</sub>NO (M+H)<sup>+</sup> 260.1434, found 260.1439.

### 3-Phenyl-2-(*m*-tolyl)-1*H*-indole (46)

Product **39** was synthesized in accordance with the typical procedure. Purification using flash column chromatography on silica gel (PE:EA = 10:1) afforded product **39** (31.7 mg, 56%) as a yellow solid (m.p. 149.5-151.5 °C).

<sup>1</sup>H NMR (400 MHz, CDCl<sub>3</sub>) δ 8.22 (s, 1H), 7.71 (d, *J* = 7.9 Hz, 1H), 7.49-7.37 (m, 5H), 7.33-7.29 (m, 1H), 7.29-7.24 (m, 2H), 7.23-7.15 (m, 3H), 7.12 (t, *J* = 3.7 Hz, 1H), 2.33 (s, 3H). <sup>13</sup>C NMR (101 MHz, CDCl<sub>3</sub>) δ 138.5, 135.9, 135.2, 134.3, 132.7, 130.3, 128.9, 128.7, 128.7, 128.6, 126.3, 125.6, 122.7, 120.5, 119.8, 115.0, 110.9, 21.6. The NMR spectra are consistent with the reported literature.<sup>4</sup>

### 2-(3-Chlorophenyl)-3-phenyl-1*H*-indole (47)

Product **40** was synthesized in accordance with the typical procedure. Purification using flash column chromatography on silica gel (PE:EA = 10:1) afforded product **40** (36.9 mg, 61%) as a yellow solid (m.p. 132.5-134.5 °C).

<sup>1</sup>H NMR (400 MHz, CDCl<sub>3</sub>) δ 8.22 (s, 1H), 7.69 (d, *J* = 8.0 Hz, 1H), 7.47-7.39 (m, 6H), 7.35-7.22 (m, 5H), 7.18 (ddd, *J* = 8.0, 7.1, 1.1 Hz, 1H). <sup>13</sup>C NMR (101 MHz, CDCl<sub>3</sub>) δ 136.1, 134.7, 134.6, 134.6, 132.5, 130.2, 130.0, 128.8, 127.9, 126.7, 126.6, 123.3, 120.8, 120.0, 116.1, 111.1. The NMR spectra are consistent with the reported literature.<sup>5</sup>

### 2-(3-Bromophenyl)-3-phenyl-1*H*-indole (48)

Product **41** was synthesized in accordance with the typical procedure. Purification using flash column chromatography on silica gel (PE:EA = 10:1) afforded product **41** (36.2 mg, 52%) as a yellow solid (m.p. 121.5-123.5 °C).

<sup>1</sup>H NMR (400 MHz, CDCl<sub>3</sub>) δ 8.23 (s, 1H), 7.68 (d, *J* = 8.0 Hz, 1H), 7.61 (t, *J* = 1.9 Hz, 1H), 7.45-7.38 (m, 6H), 7.35-7.27 (m, 3H), 7.19-7.13 (m, 2H). <sup>13</sup>C NMR (101 MHz, CDCl<sub>3</sub>) δ 136.1, 134.9, 134.6, 132.4, 130.7, 130.7, 130.3, 130.2, 128.8, 127.1, 126.7, 123.3, 122.8, 120.8, 120.0, 116.2, 111.1. The NMR spectra are consistent with the reported literature.<sup>6</sup>

### 3-Phenyl-2-(*p*-tolyl)-1*H*-indole (49)

Product **49** was synthesized in accordance with the typical procedure. Purification using flash column chromatography on silica gel (PE:EA = 10:1) afforded product **49** (52.6 mg, 93%) as a yellow solid (m.p. 58-60 °C).

<sup>1</sup>H NMR (400 MHz, CDCl<sub>3</sub>) δ 8.17 (s, 1H), 7.77 (d, *J* = 8.0 Hz, 1H), 7.53 (dt, *J* = 8.1, 1.8 Hz, 2H), 7.46 (td, *J* = 7.5, 1.6 Hz, 3H), 7.39-7.34 (m, 3H), 7.33-7.29 (m, 1H), 7.23 (td, *J* = 7.5, 7.0, 1.1 Hz, 1H), 7.19 (d, *J* = 7.9 Hz, 2H), 2.42 (s, 3H). <sup>13</sup>C NMR (101 MHz, CDCl<sub>3</sub>) δ 137.7, 135.9, 135.3, 134.4, 130.3, 129.8, 129.5, 128.9, 128.6, 128.2, 126.3, 122.6, 120.5, 119.7, 114.6, 110.9, 21.4. HRMS *m/z* (ESI) calcd for C<sub>21</sub>H<sub>17</sub>N (M+Na)<sup>+</sup> 306.1253, found 306.1260.

### 2-(4-Methoxyphenyl)-3-phenyl-1*H*-indole (50)

Product **50** was synthesized in accordance with the typical procedure. Purification using flash column chromatography on silica gel (PE:EA = 10:1) afforded product **50** (56.8 mg, 95%) as a



yellow solid (m.p. 162-164 °C).

<sup>1</sup>H NMR (400 MHz, CDCl<sub>3</sub>) δ 8.19 (s, 1H), 7.77 (d, *J* = 7.9 Hz, 1H), 7.55-7.51 (m, 2H), 7.48-7.35 (m, 6H), 7.29 (t, *J* = 7.5 Hz, 1H), 7.23 (t, *J* = 7.5 Hz, 1H), 6.92-6.87 (m, 2H), 3.84 (s, 3H). <sup>13</sup>C NMR (101 MHz, CDCl<sub>3</sub>) δ 159.3, 135.9, 135.4, 134.3, 130.3, 129.6, 128.9, 128.6, 126.2, 125.3, 122.5, 120.5, 119.6, 114.3, 110.9, 55.4. HRMS *m/z* (ESI) calcd for C<sub>21</sub>H<sub>17</sub>NO (M+H)<sup>+</sup> 300.1383, found 300.1373.

### **3-Phenyl-2-4-(trifluoromethyl)phenyl-1*H*-indole (51)**

Product **51** was synthesized in accordance with the typical procedure. Purification using flash column chromatography on silica gel (PE:EA = 10:1) afforded product **51** (30.3 mg, 45%) as a yellow solid (m.p. 123-125 °C).

<sup>1</sup>H NMR (400 MHz, CDCl<sub>3</sub>) δ 8.27 (s, 1H), 7.70 (d, *J* = 9.1 Hz, 1H), 7.60-7.50 (m, 4H), 7.47-7.41 (m, 5H), 7.39-7.34 (m, 1H), 7.31 (ddd, *J* = 8.2, 7.0, 1.2 Hz, 1H), 7.20 (ddd, *J* = 8.1, 7.0, 1.1 Hz, 1H). <sup>13</sup>C NMR (101 MHz, CDCl<sub>3</sub>) δ 136.3, 134.6, 132.4, 130.3, 129.6, 129.3, 128.9, 128.9, 128.3, 126.9, 125.8, 125.7, 125.6, 123.6, 122.9, 120.9, 120.2, 116.8, 111.2. <sup>19</sup>F NMR (376 MHz, CDCl<sub>3</sub>) δ -62.4. HRMS *m/z* (ESI) calcd for C<sub>21</sub>H<sub>14</sub>F<sub>3</sub>N (M+H)<sup>+</sup> 338.1151, found 338.1141.

### **3-(4-Bromophenyl)-2-phenyl-1*H*-indole (52)**

Product **52** was synthesized in accordance with the typical procedure. Purification using flash column chromatography on silica gel (PE:EA = 10:1) afforded product **52** (59.3 mg, 96%) as a yellow solid (m.p. 135-137 °C).

<sup>1</sup>H NMR (400 MHz, CDCl<sub>3</sub>) δ 7.70 (dt, *J* = 7.9, 1.0 Hz, 1H), 7.60-7.57 (m, 2H), 7.50-7.43 (m, 4H), 7.39-7.33 (m, 4H), 7.32-7.27 (m, 2H), 7.23-7.14 (m, 2H), 6.89 (d, *J* = 16.7 Hz, 1H), 3.95 (s, 3H). <sup>13</sup>C NMR (101 MHz, CDCl<sub>3</sub>) δ 138.4, 137.4, 135.5, 134.3, 132.9, 130.4, 128.9, 128.7, 127.9, 127.3, 126.5, 126.3, 122.9, 120.3, 119.7, 117.9, 117.3, 109.5, 31.6. HRMS *m/z* (ESI) calcd for C<sub>23</sub>H<sub>19</sub>N (M+Na)<sup>+</sup> 332.1410, found 332.1411.

### **3-(4-Bromophenyl)-2-phenyl-1*H*-indole (53)**

Product **53** was synthesized in accordance with the typical procedure. Purification using flash column chromatography on silica gel (PE:EA = 10:1) afforded product **53** (50.6 mg, 75%) as a yellow solid (m.p. 75.5-77.5 °C).

<sup>1</sup>H NMR (400 MHz, CDCl<sub>3</sub>) δ 8.25 (dt, *J* = 8.4, 0.9 Hz, 1H), 7.52-7.45 (m, 5H), 7.41-7.37 (m, 2H), 7.34 (d, *J* = 4.5 Hz, 4H), 7.30-7.23 (m, 3H), 6.57 (d, *J* = 16.5 Hz, 1H), 2.71 (s, 3H). <sup>13</sup>C NMR (101 MHz, CDCl<sub>3</sub>) δ 171.6, 136.8, 136.7, 135.5, 133.8, 133.7, 130.3, 130.0, 128.9, 128.8, 128.3, 127.5, 126.7, 125.6, 124.0, 123.8, 119.9, 118.9, 115.4, 28.2. HRMS *m/z* (ESI) calcd for C<sub>24</sub>H<sub>19</sub>NO (M+H)<sup>+</sup> 338.1539, found 338.1540.

### ***Tert*-butyl(*E*)-3-phenyl-2-styryl-1*H*-indole-1-carboxylate (54)**

Product **54** was synthesized in accordance with the typical procedure. Purification using flash column chromatography on silica gel (PE:EA = 10:1) afforded product **54** (73.5 mg, 93%) as a yellow solid (m.p. 127.5-129.5 °C).

<sup>1</sup>H NMR (400 MHz, CDCl<sub>3</sub>) δ 8.24 (dt, *J* = 8.4, 0.9 Hz, 1H), 7.57-7.52 (m, 3H), 7.51-7.46 (m, 3H), 7.39 (ddt, *J* = 8.4, 7.2, 1.5 Hz, 2H), 7.34-7.30 (m, 4H), 7.29-7.25 (m, 2H), 6.51 (d, *J* = 16.5 Hz, 1H), 1.74 (s, 9H). <sup>13</sup>C NMR (101 MHz, CDCl<sub>3</sub>) δ 150.9, 137.3, 136.2, 134.4, 134.3, 130.5, 130.2, 128.8, 128.7, 127.8, 127.2, 126.4, 124.8, 123.1, 122.2, 119.7, 119.4, 115.5, 84.2, 28.4. HRMS *m/z* (ESI) calcd for C<sub>27</sub>H<sub>25</sub>NO<sub>2</sub> (M+H)<sup>+</sup> 396.1958, found 396.1961.

**(E)-3-Phenyl-2-styryl-1-tosyl-1H-indole (55)**

Product **55** was synthesized in accordance with the typical procedure. Purification using flash column chromatography on silica gel (PE:EA = 10:1) afforded product **55** (67.3 mg, 75%) as a yellow solid (m.p. 146.5-148.5 °C).

<sup>1</sup>H NMR (400 MHz, CDCl<sub>3</sub>) δ 8.31 (d, *J* = 9.3 Hz, 1H), 7.66-7.61 (m, 3H), 7.43-7.27 (m, 12H), 7.25-7.21 (m, 1H), 7.12 (d, *J* = 7.8 Hz, 2H), 6.40 (d, *J* = 16.5 Hz, 1H), 2.31 (s, 3H). <sup>13</sup>C NMR (101 MHz, CDCl<sub>3</sub>) δ 144.9, 137.1, 136.8, 136.3, 135.5, 134.7, 133.6, 131.2, 130.2, 129.7, 128.9, 128.8, 128.3, 127.5, 127.0, 126.7, 125.3, 124.2, 123.9, 117.7, 115.5, 21.7. HRMS *m/z* (ESI) calcd for C<sub>29</sub>H<sub>23</sub>NO<sub>2</sub>S (M+H)<sup>+</sup> 450.1522, found 450.1530.

**2-Phenethyl-3-phenyl-1H-indole (56)**

Product **56** was synthesized in accordance with the typical procedure. Purification using flash column chromatography on silica gel (PE:EA = 10:1) afforded product **56** (51.1 mg, 86%) as a yellow oil.

<sup>1</sup>H NMR (400 MHz, CDCl<sub>3</sub>) δ 7.79 (s, 1H), 7.69 (d, *J* = 7.9 Hz, 1H), 7.52-7.47 (m, 4H), 7.40-7.26 (m, 5H), 7.24-7.14 (m, 4H), 3.23-3.17 (m, 2H), 3.02 (t, *J* = 7.6 Hz, 2H). <sup>13</sup>C NMR (101 MHz, CDCl<sub>3</sub>) δ 141.1, 135.3, 135.3, 135.1, 129.7, 128.7, 128.6, 128.6, 127.9, 126.5, 126.1, 121.8, 120.0, 119.1, 114.9, 110.6, 36.2, 28.4. HRMS *m/z* (ESI) calcd for C<sub>22</sub>H<sub>19</sub>N (M+H)<sup>+</sup> 298.1590, found 298.1594.

## 9. X-Ray Crystallographic Data of Product 41

Single crystals were grown by slow evaporation of concentrated solution in mixed solution (0.5 mL DCM and 0.5 mL PE); Compound **41** was placed in a glass vial (1 mL), which were then sealed by plugs with needles on them.

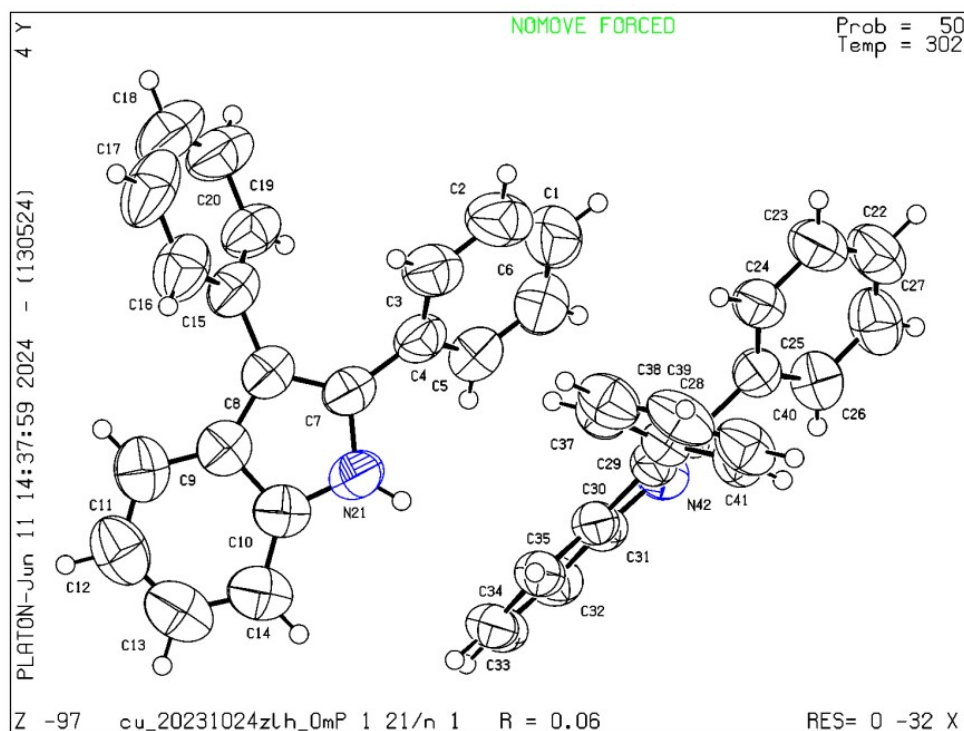

Figure S1. The crystal structure of product **41**

Table S2. Crystal data and structure refinement for product **41**.

|                        |                                   |                                          |                |
|------------------------|-----------------------------------|------------------------------------------|----------------|
| Bond precision:        | C-C = 0.0033 Å                    | Wavelength = 1.54178                     |                |
| Cell:                  | a = 16.0588(7)                    | b = 10.0682(4)                           | c = 18.9261(8) |
|                        | alpha = 90                        | beta = 103.229(2)                        | gamma = 90     |
| Temperature:           | 302 K                             |                                          |                |
|                        | Calculated                        | Reported                                 |                |
| Volume                 | 2978.8(2)                         | 2978.8(2)                                |                |
| Space group            | P 21/n                            | P 1 21/n 1                               |                |
| Hall group             | -P 2yn                            | -P 2yn                                   |                |
| Moiety formula         | C <sub>20</sub> H <sub>15</sub> N | 0.09 (C <sub>20</sub> H <sub>15</sub> N) |                |
| Sum formula            | C <sub>20</sub> H <sub>15</sub> N | C H N                                    |                |
| Mr                     | 269.33                            | 27.03                                    |                |
| Dx, g cm <sup>-3</sup> | 1.201                             | 1.326                                    |                |
| z                      | 8                                 | 88                                       |                |
| Mu (mm <sup>-1</sup> ) | 0.532                             | 0.779                                    |                |
| F000                   | 1136.0                            | 1232.0                                   |                |

|                                                                    |              |                                  |  |
|--------------------------------------------------------------------|--------------|----------------------------------|--|
| F000'                                                              | 1138.97      |                                  |  |
| h, k, lmax                                                         | 19, 12, 22   | 19, 12, 22                       |  |
| Nref                                                               | 5466         | 5451                             |  |
| Tmin, Tmax                                                         | 0.911, 0.940 | 0.591, 0.753                     |  |
| Tmin'                                                              | 0.856        |                                  |  |
| Correction method = # Reported T Limits: Tmin = 0.591 Tmax = 0.753 |              |                                  |  |
| AbsCorr = MULTI-SCAN                                               |              |                                  |  |
| Data completeness = 0.997                                          |              | Theta(max) = 68.438              |  |
| R (reflections) = 0.0568 (3812)                                    |              | wR2(reflections) = 0.1601 (5451) |  |
| S = 1.031                                                          |              | Npar = 379                       |  |

## 10. Reference

- (1) F. Pedro, A. Carmen and S. Mónica, *Eur. J. Org. Chem.*, 1995, **1995**, 1895–1899.
- (2) G. A. Kraus and H. Guo, *J. Org. Chem.* 2009, **74**, 5337–5341.
- (3) P. Valentina, B. Micol, A. Giorgio. R. Silvia and R. Elisabetta, *Adv. Synth. Catal.*, 2017, **359**, 1912–1918.
- (4) Y. Kang, R. Hou, X. Min, T. Wang, Y. Liang and Z. Zhang, *Synthesis*, 2022, **54**, 1621–1632.
- (5) Y. Daisuke, N. Takahiro and Y. Hideki, *Chem. Commun.*, 2017, **53**, 2760–2763.
- (6) R. K. Maurya, O. P. S. Patel, D. Anand and P. P. Yadav, *Org. Chem. Front.*, 2018, **5**, 1170–1175.
- (7) J. Li, Y. An, J. Li, S. Yang, W. Wu, H. Jiang, *Org. Chem. Front.*, 2017, **4**, 1590–1594.

## 11. NMR Spectra

$^1\text{H}$  NMR of **1a** (400 MHz,  $\text{DMSO-}d_6$ )

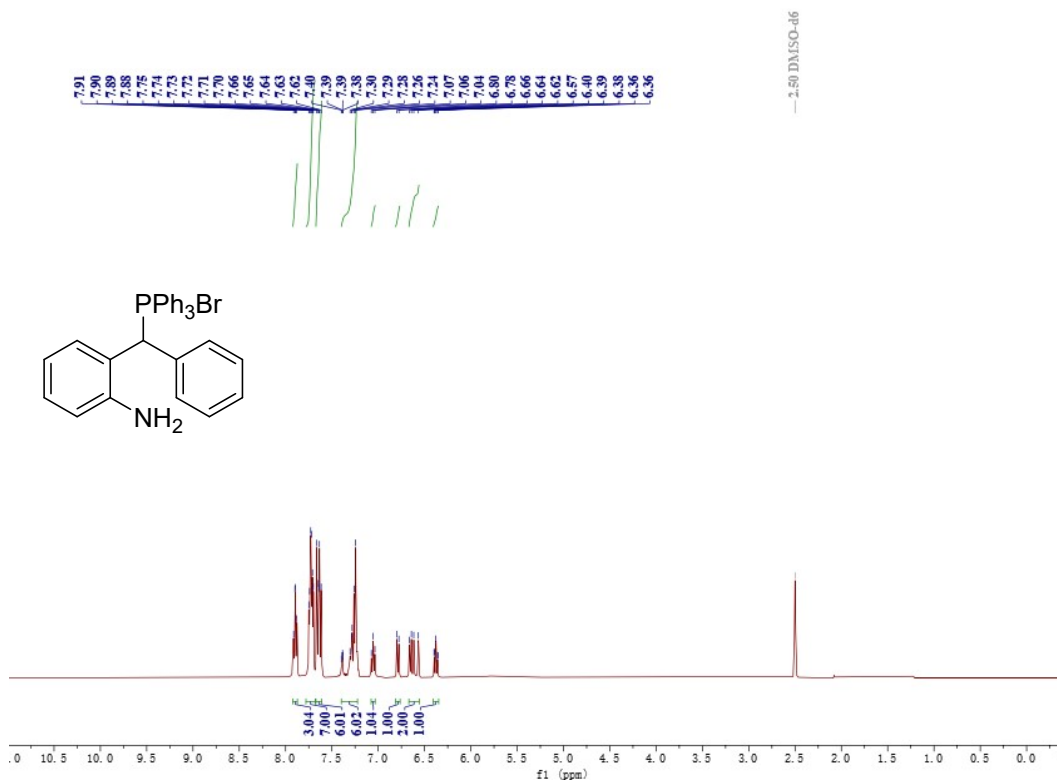

$^1\text{H}$  NMR of **1b** (400 MHz,  $\text{DMSO-}d_6$ )

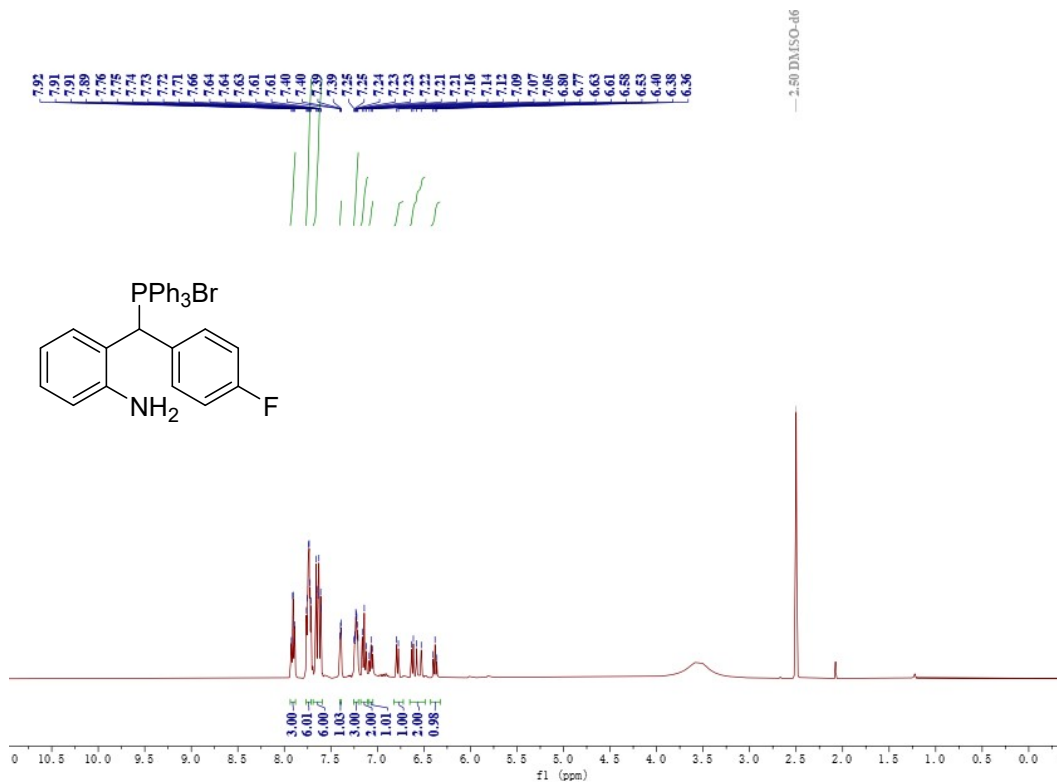

<sup>1</sup>H NMR of **1c** (400 MHz, DMSO-*d*<sub>6</sub>)

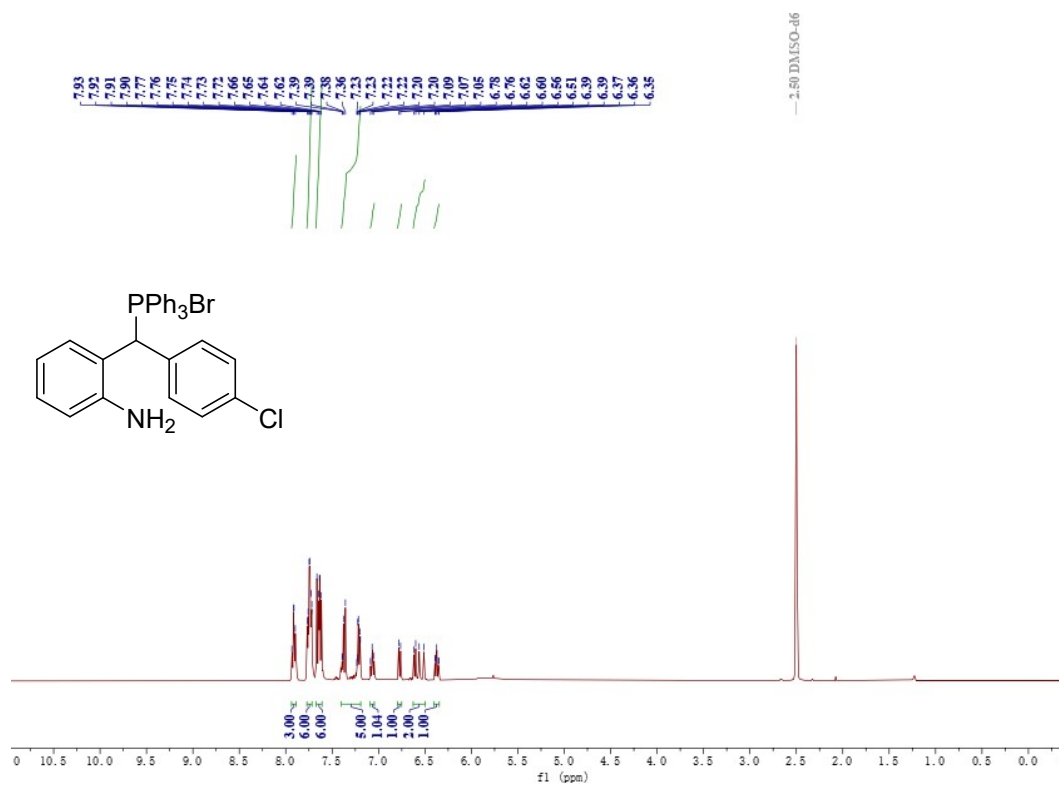

<sup>1</sup>H NMR of **1d** (400 MHz, DMSO-*d*<sub>6</sub>)

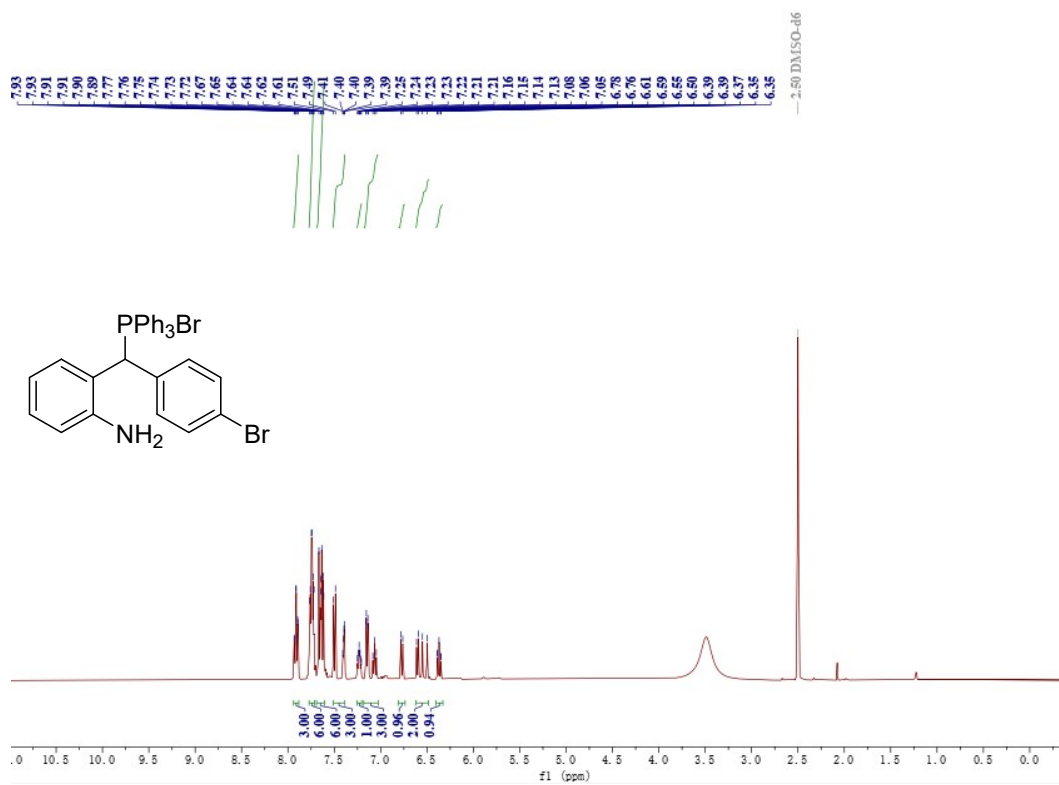

<sup>1</sup>H NMR of **1e** (400 MHz, DMSO-*d*<sub>6</sub>)

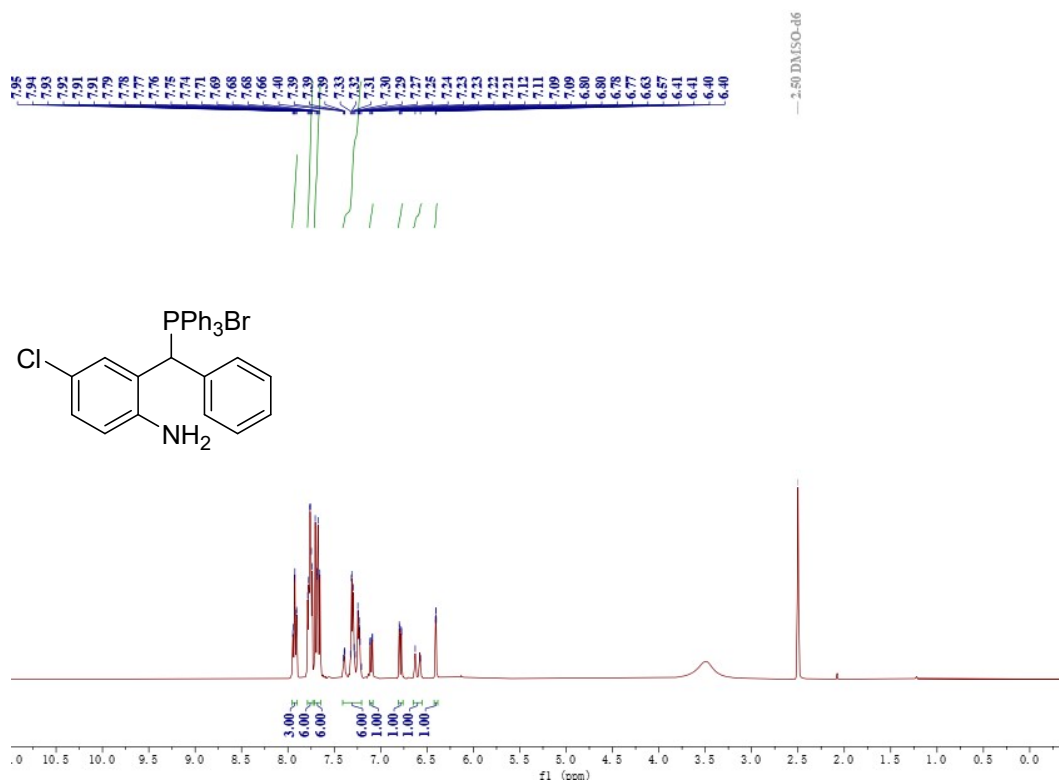

<sup>1</sup>H NMR of **1f** (400 MHz, DMSO-*d*<sub>6</sub>)

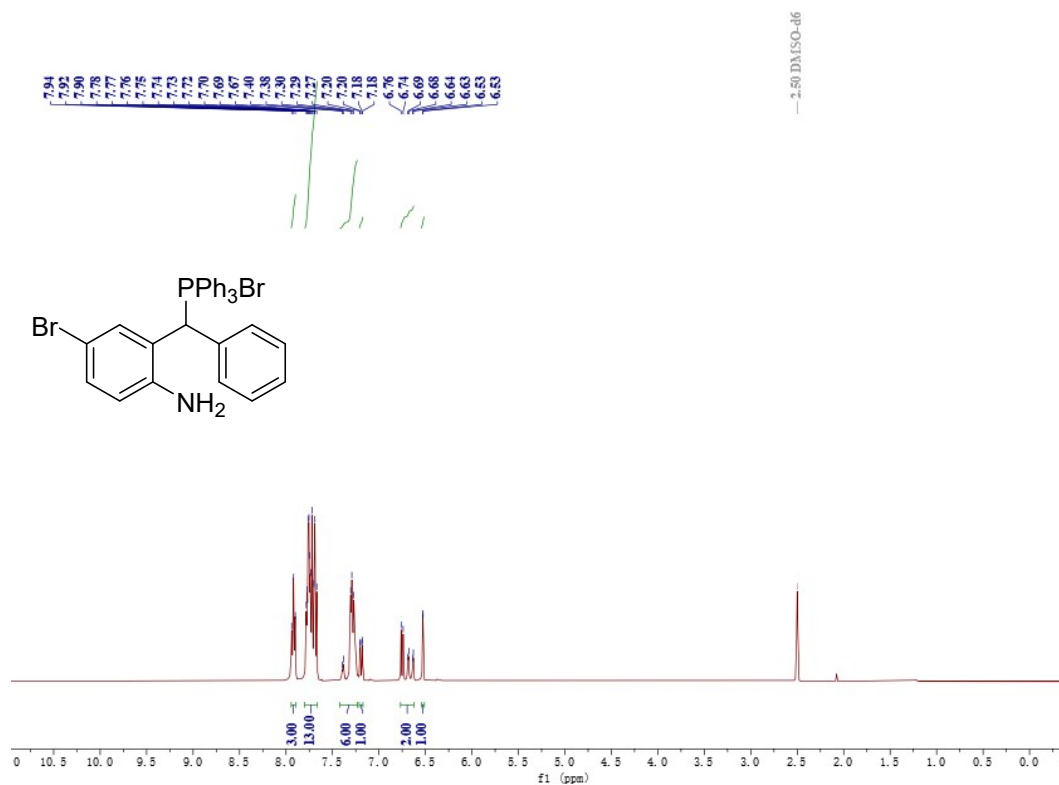





$^{13}\text{C}$  NMR of **3** (101 MHz,  $\text{CDCl}_3$ )

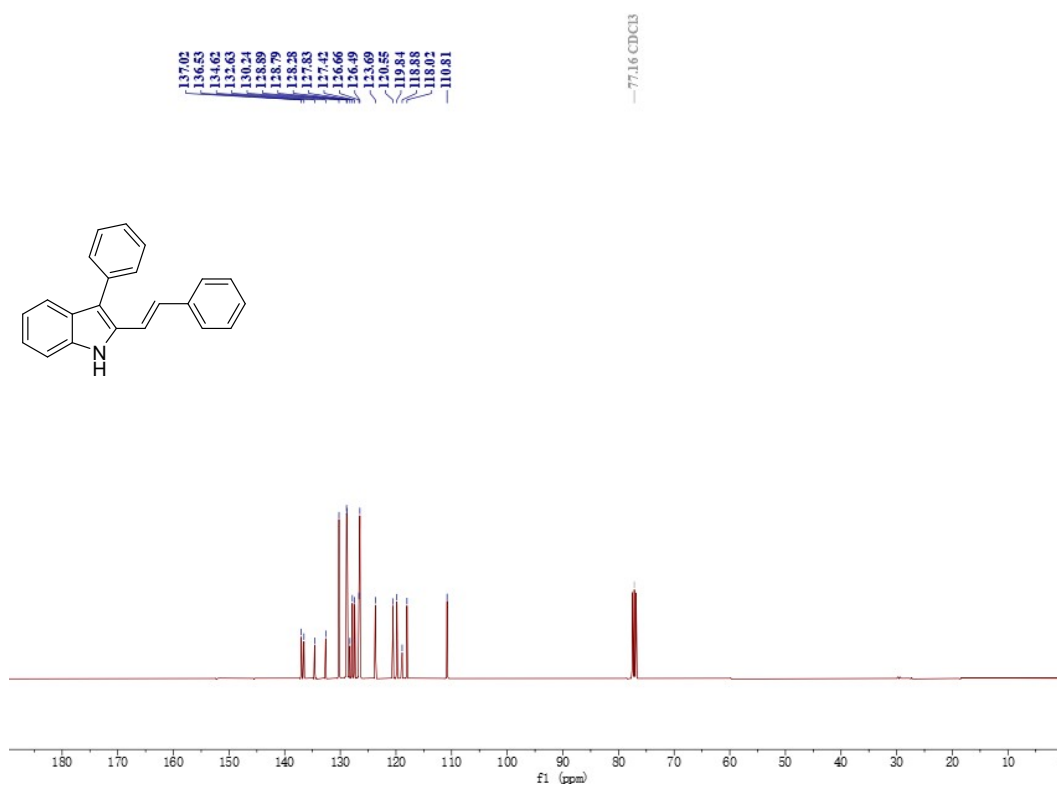

$^1\text{H}$  NMR of **4** (400 MHz,  $\text{CDCl}_3$ )

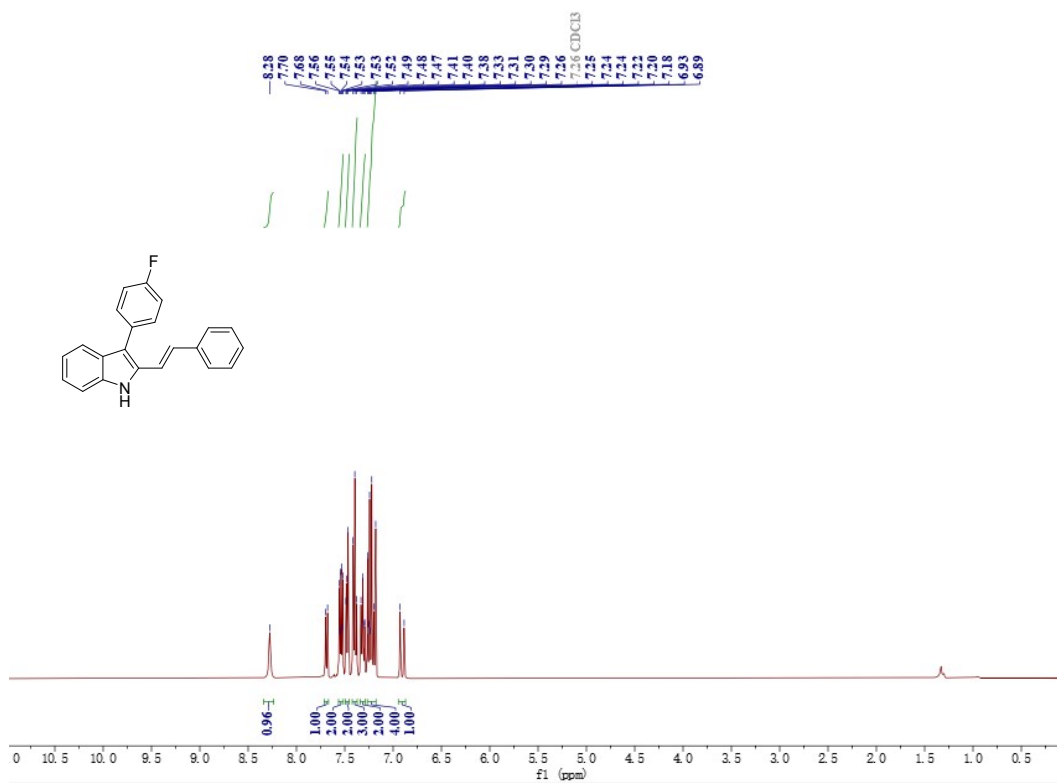

$^{13}\text{C}$  NMR of **4** (101 MHz,  $\text{CDCl}_3$ )

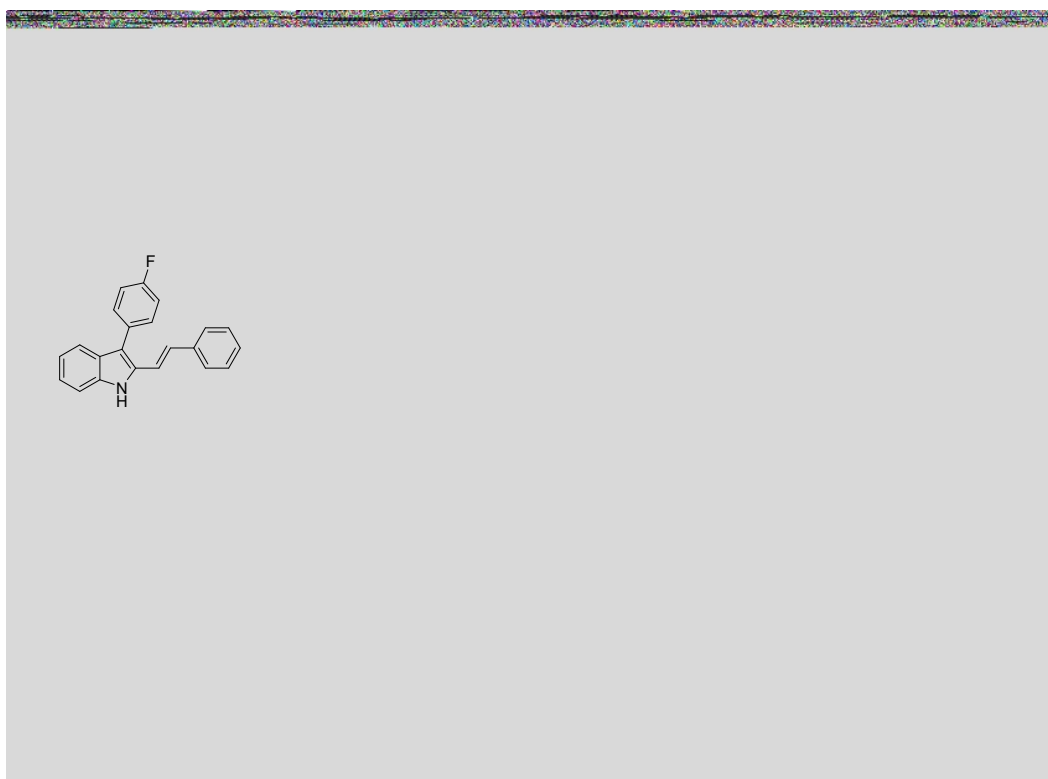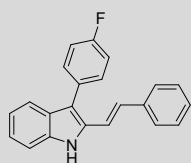

$^{19}\text{F}$  NMR of **4** (376 MHz,  $\text{CDCl}_3$ )

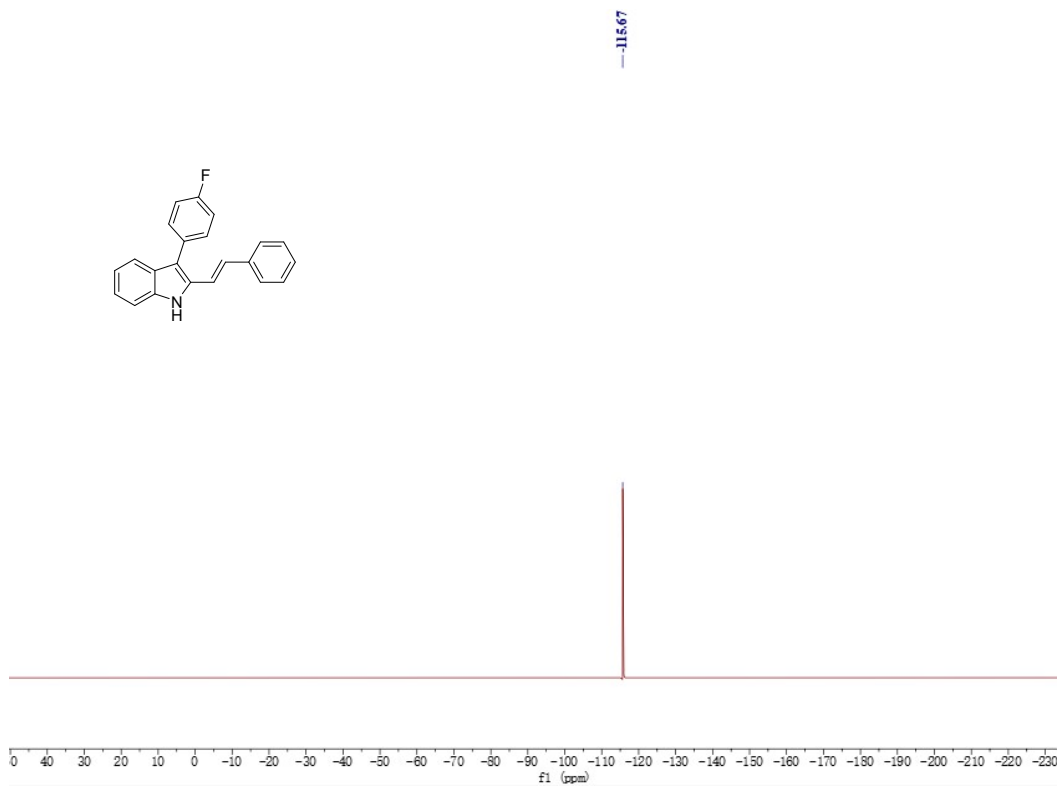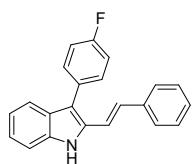

<sup>1</sup>H NMR of **5** (400 MHz, CDCl<sub>3</sub>)

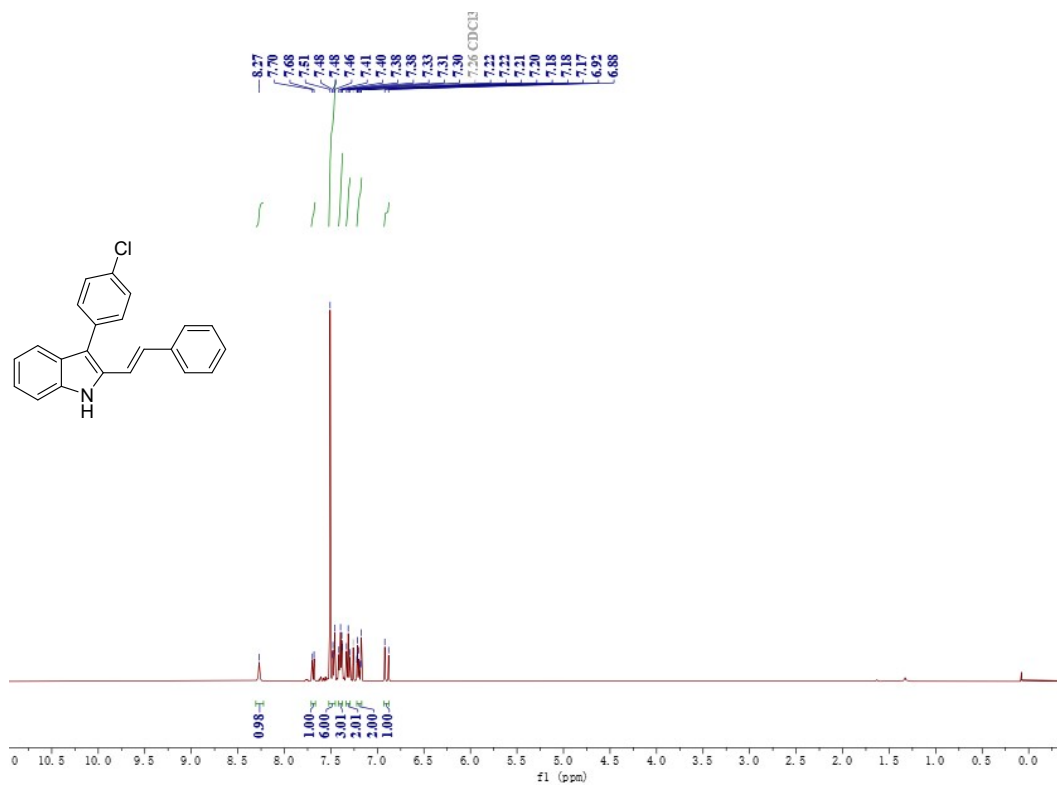

<sup>13</sup>C NMR of **5** (101 MHz, CDCl<sub>3</sub>)

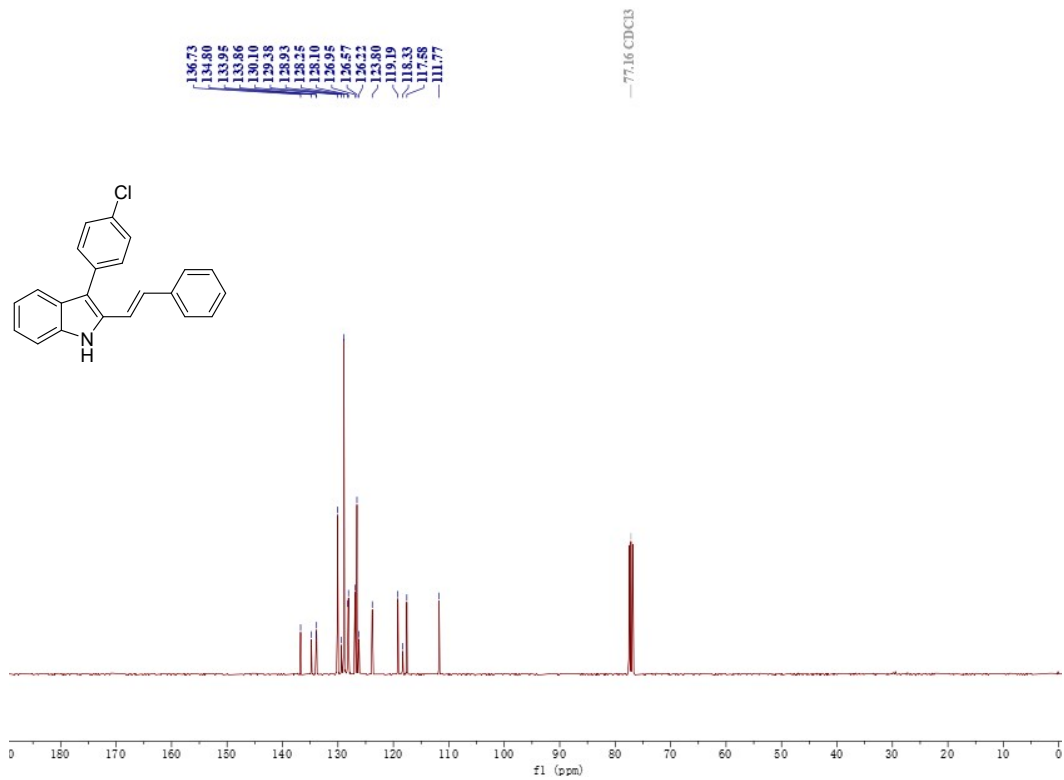

<sup>1</sup>H NMR of **6** (400 MHz, CDCl<sub>3</sub>)

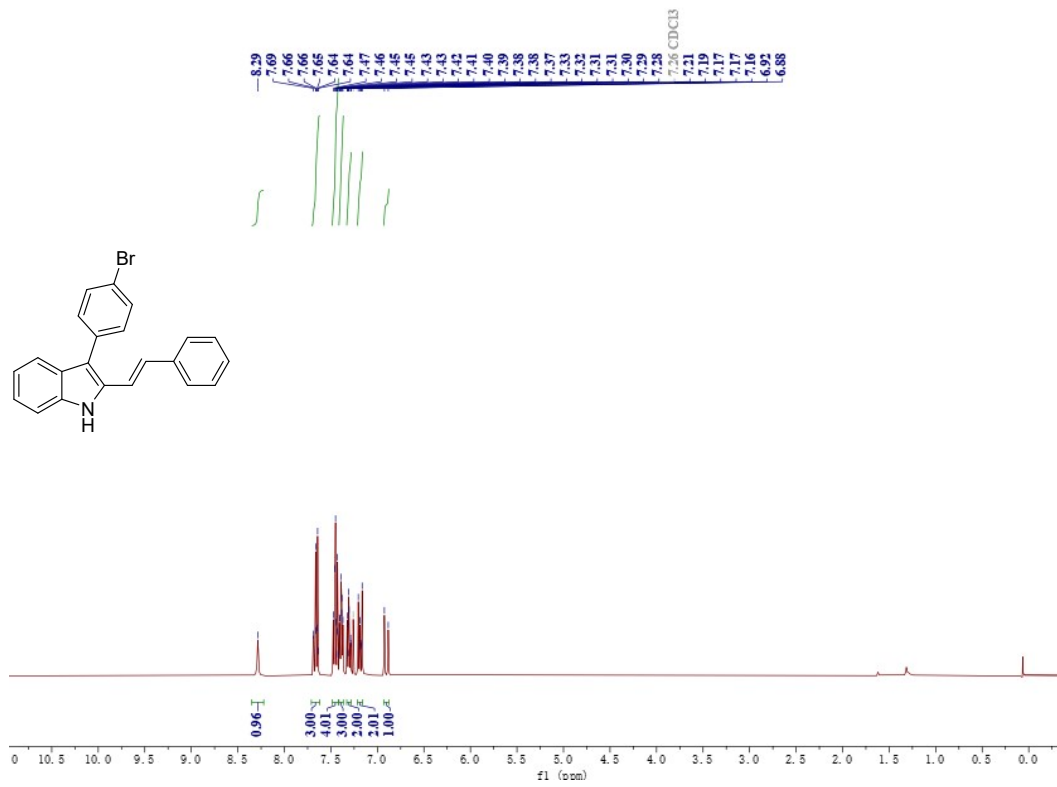

<sup>13</sup>C NMR of **6** (101 MHz, CDCl<sub>3</sub>)

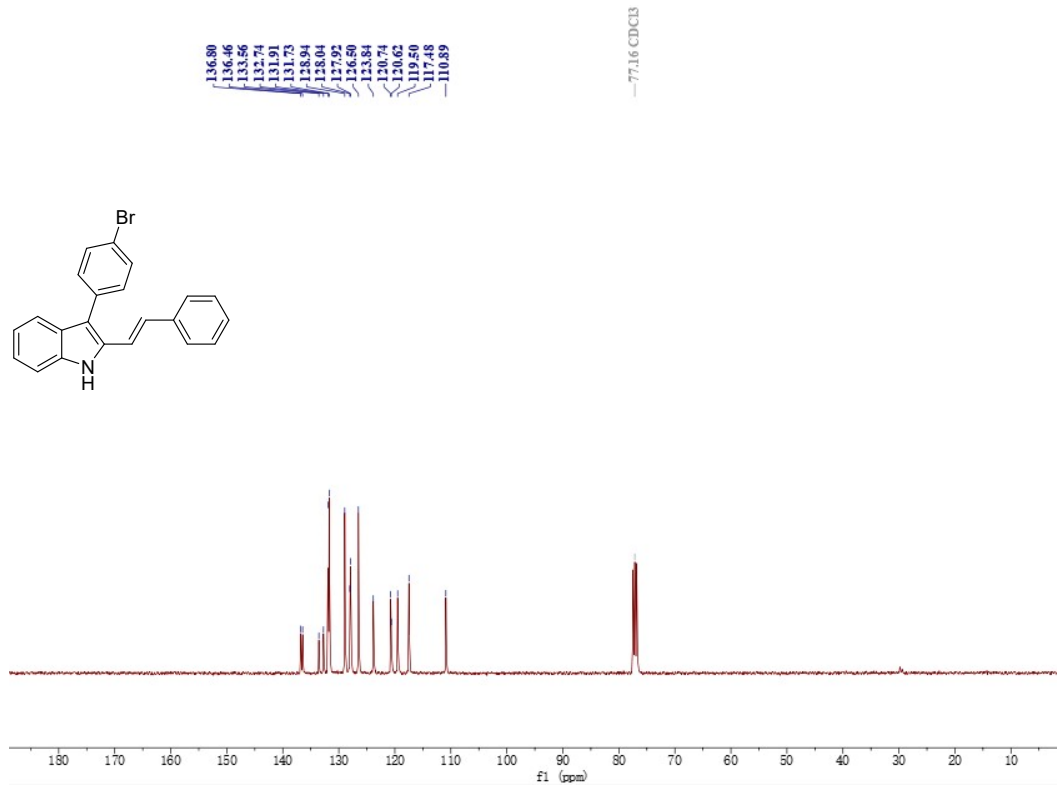

<sup>1</sup>H NMR of 7 (400 MHz, CDCl<sub>3</sub>)

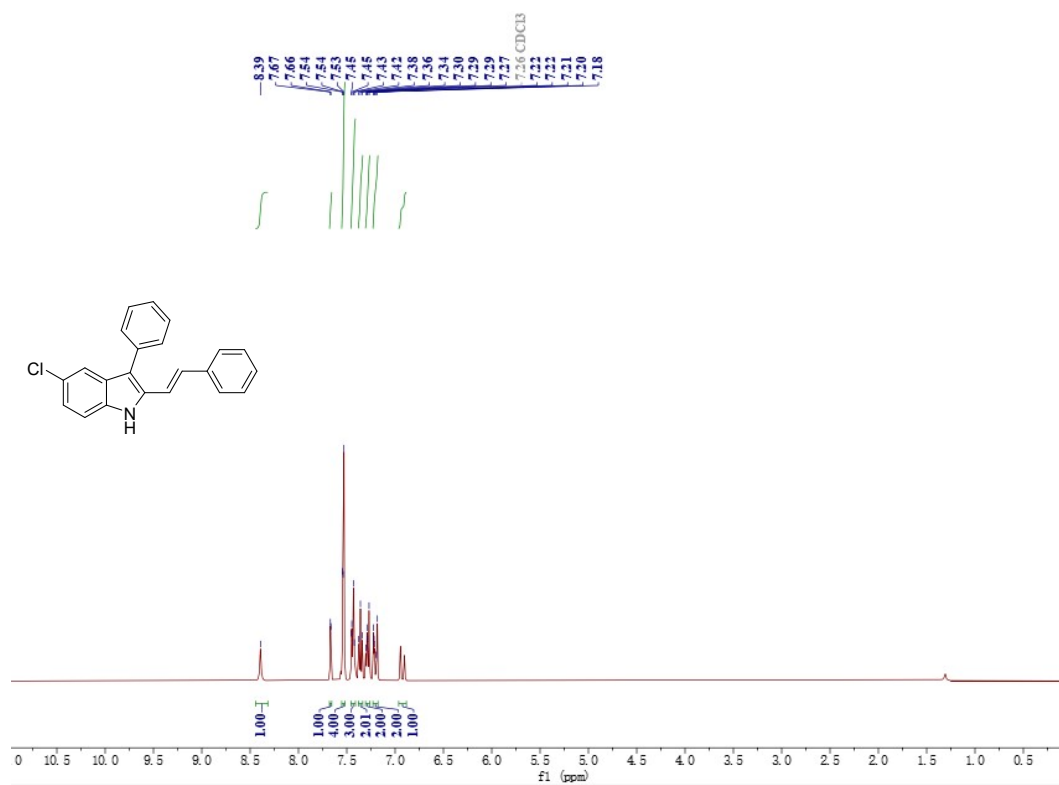

<sup>13</sup>C NMR of 7 (101 MHz, CDCl<sub>3</sub>)

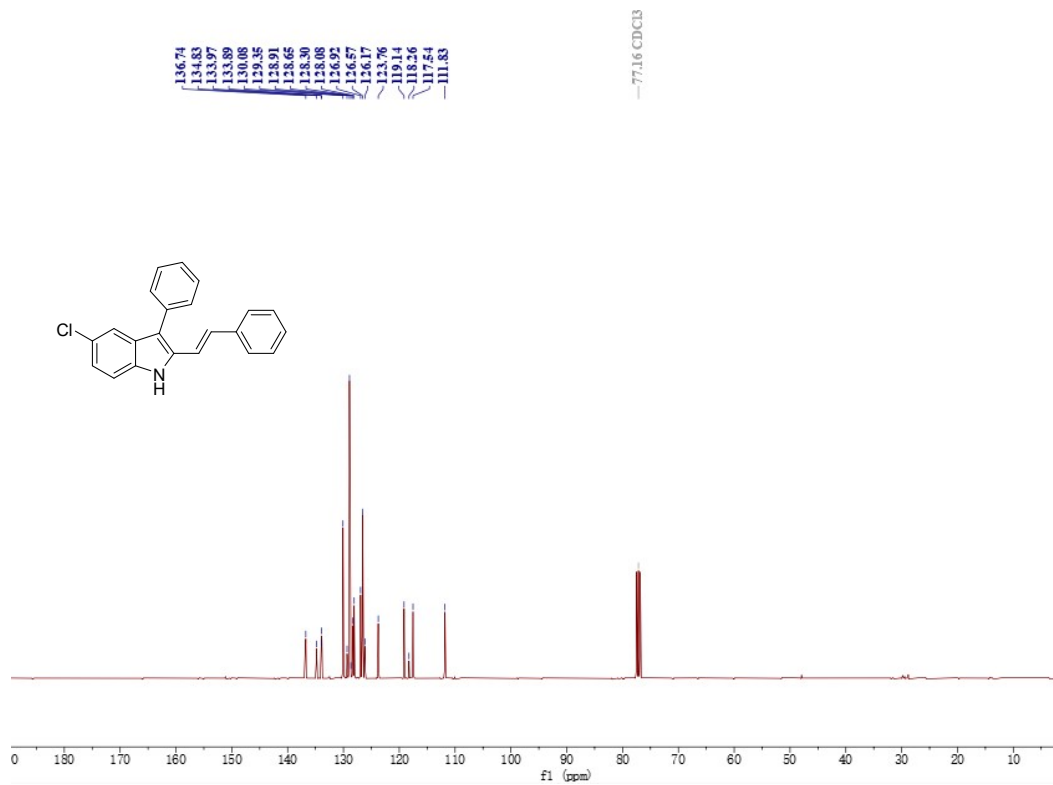

<sup>1</sup>H NMR of **8** (101 MHz, CDCl<sub>3</sub>)

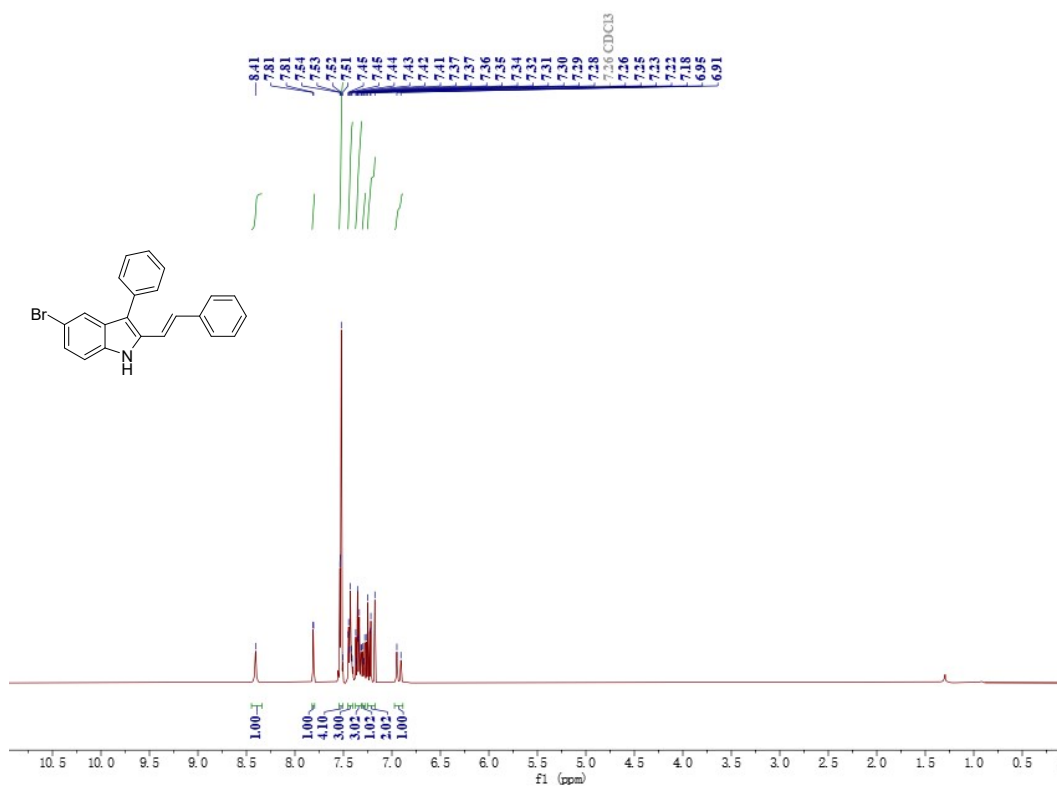

<sup>13</sup>C NMR of **8** (101 MHz, CDCl<sub>3</sub>)

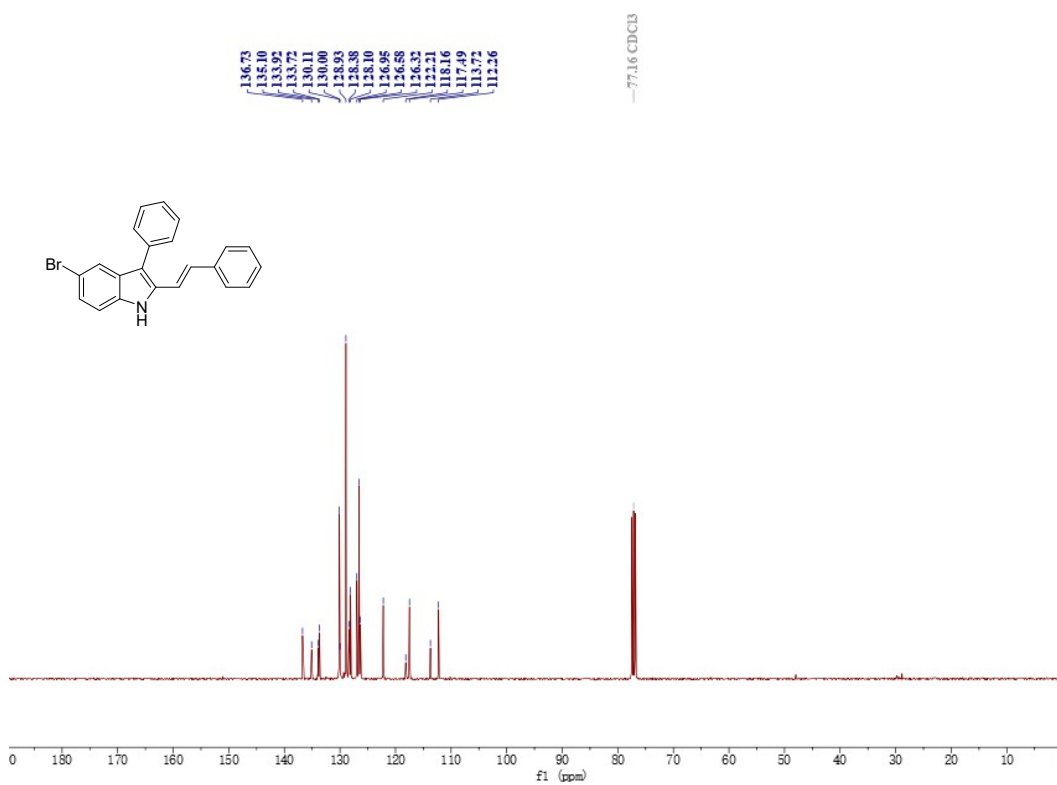

<sup>1</sup>H NMR of **9** (400 MHz, CDCl<sub>3</sub>)

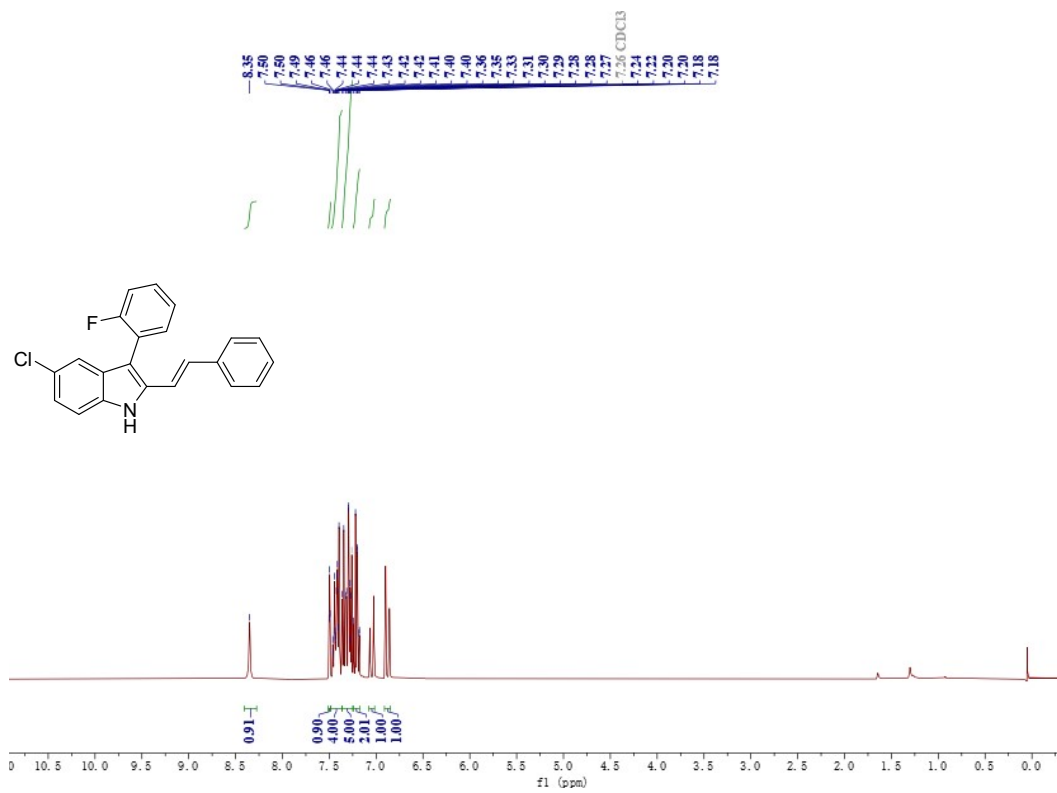

**<sup>13</sup>C NMR of 9 (101 MHz, CDCl<sub>3</sub>)**

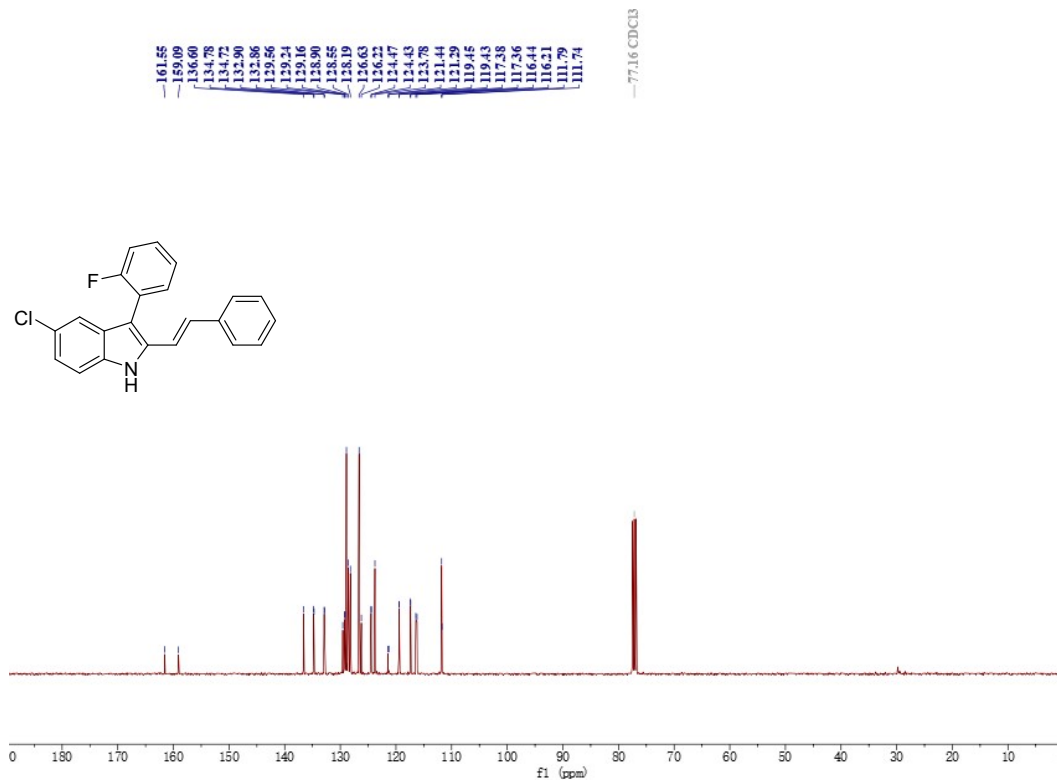

**<sup>19</sup>F NMR of 9 (376 MHz, CDCl<sub>3</sub>)**

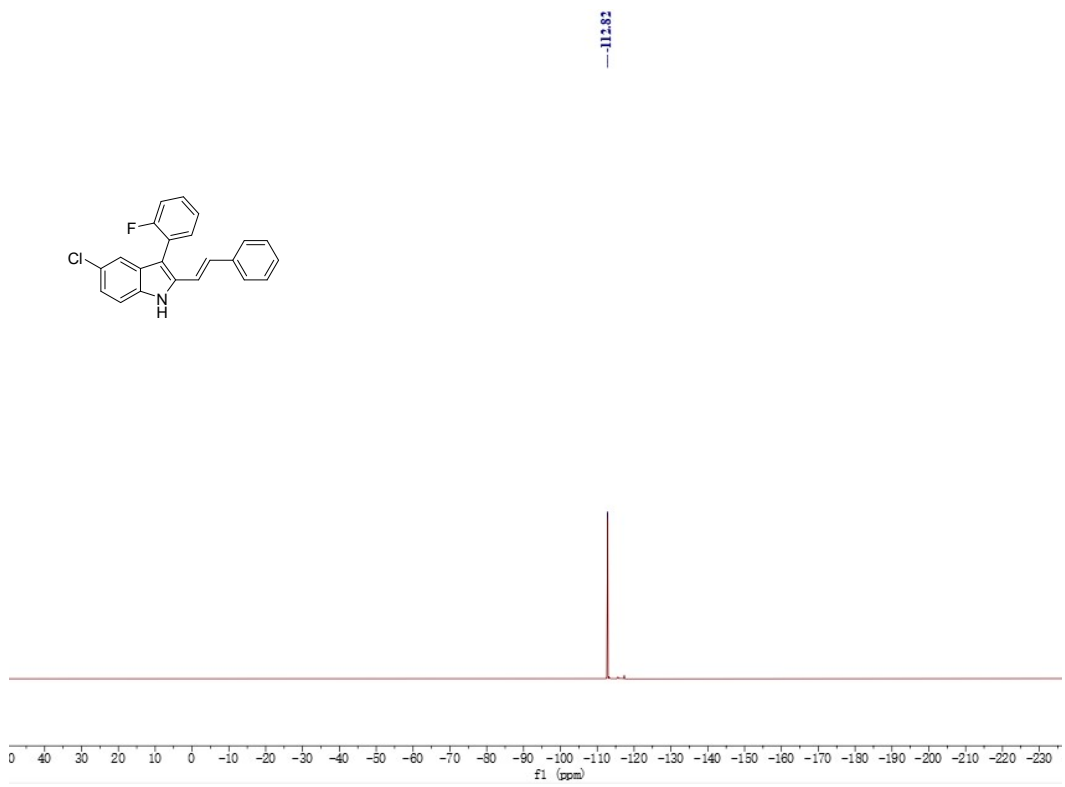

<sup>1</sup>H NMR of **10** (400 MHz, CDCl<sub>3</sub>)

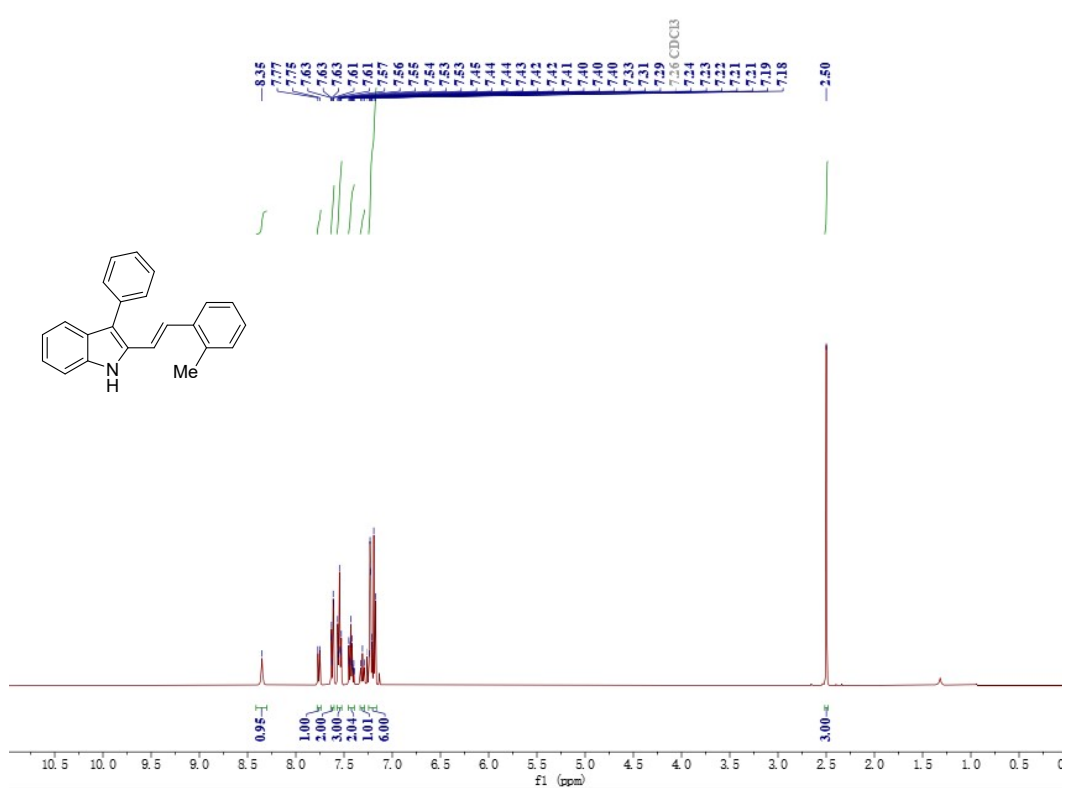

<sup>13</sup>C NMR of **10** (101 MHz, CDCl<sub>3</sub>)



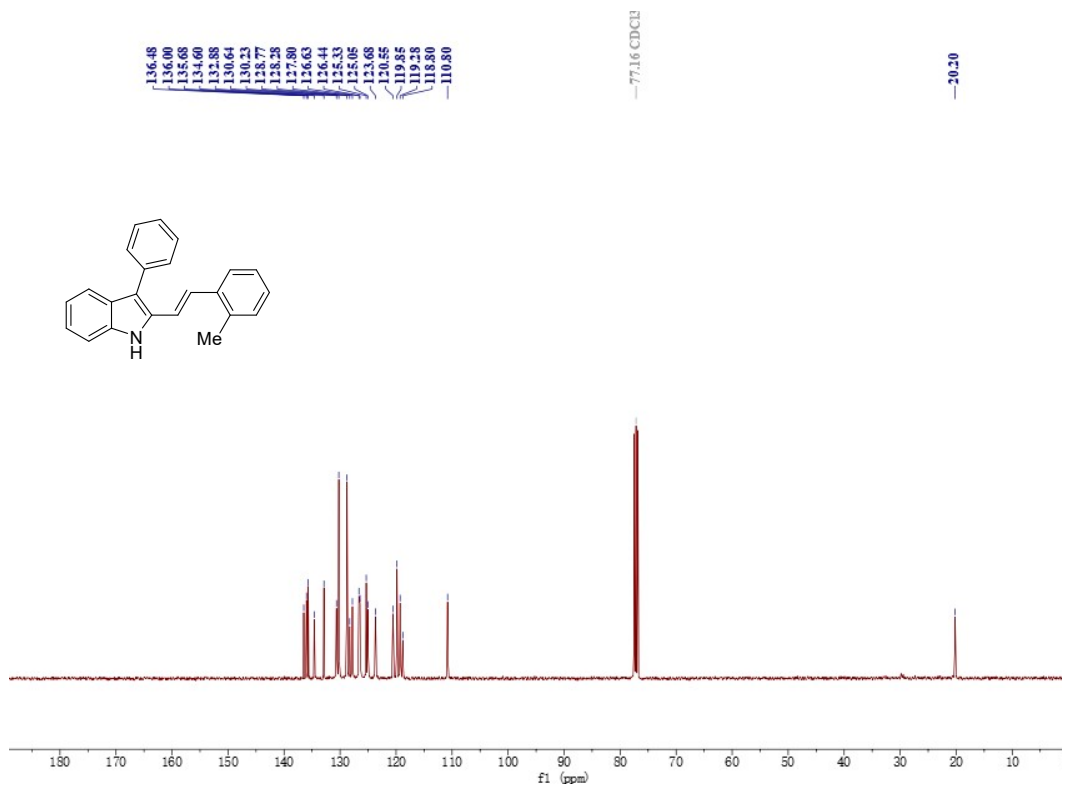

<sup>1</sup>H NMR of **11** (400 MHz, CDCl<sub>3</sub>)

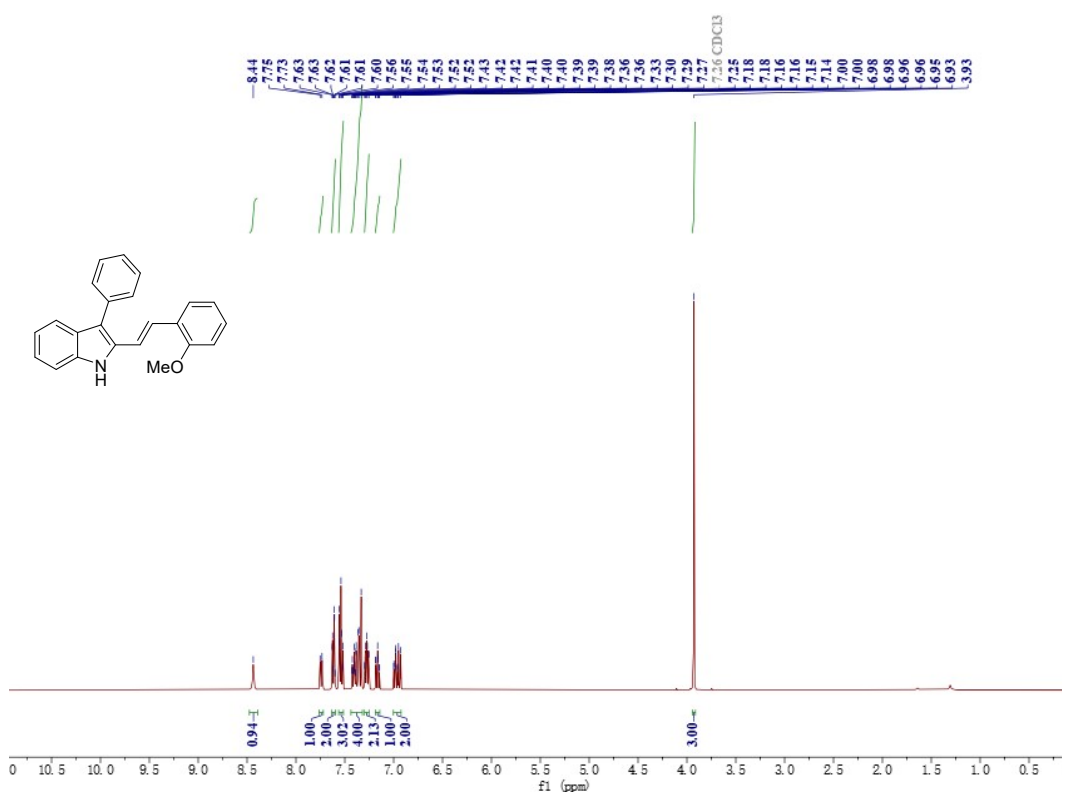

<sup>13</sup>C NMR of **11** (101 MHz, CDCl<sub>3</sub>)

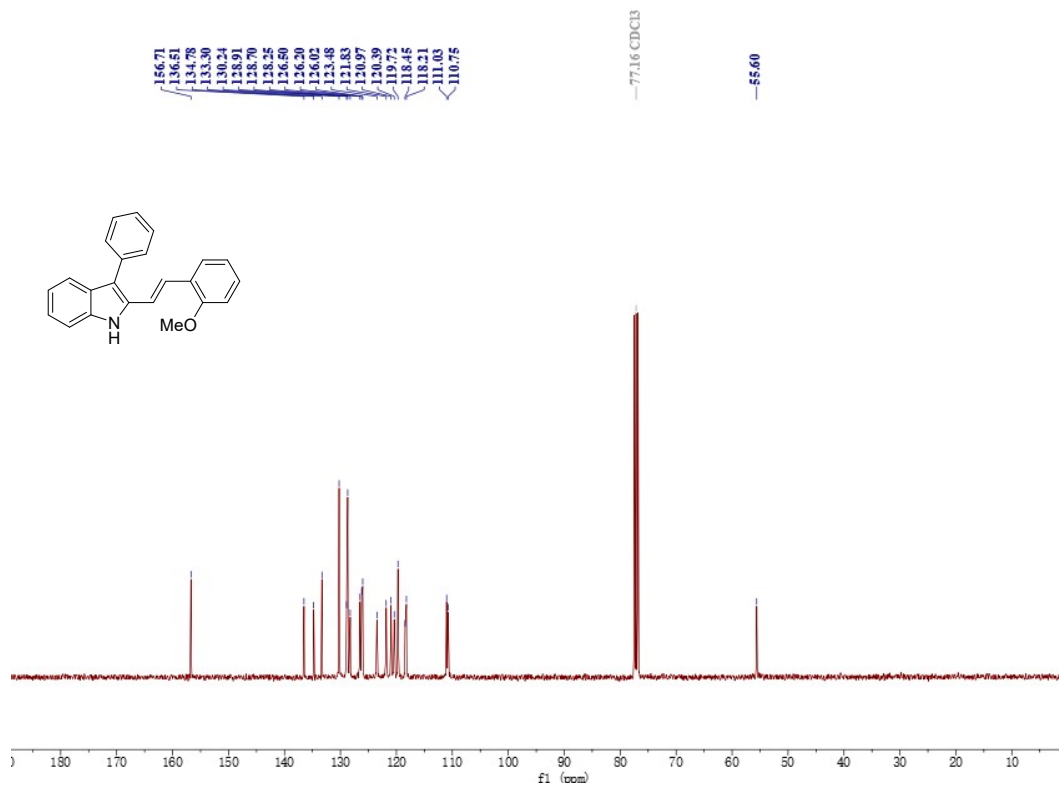

<sup>1</sup>H NMR of **12** (400 MHz, CDCl<sub>3</sub>)

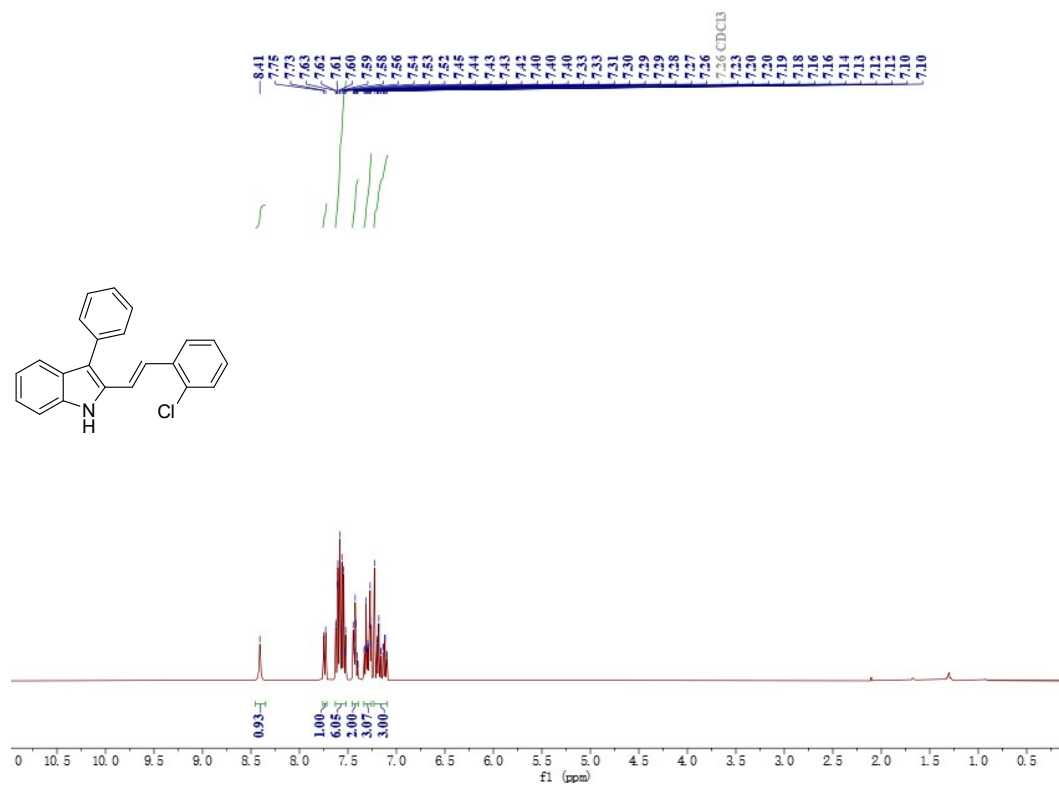

<sup>13</sup>C NMR of **12** (101 MHz, CDCl<sub>3</sub>)

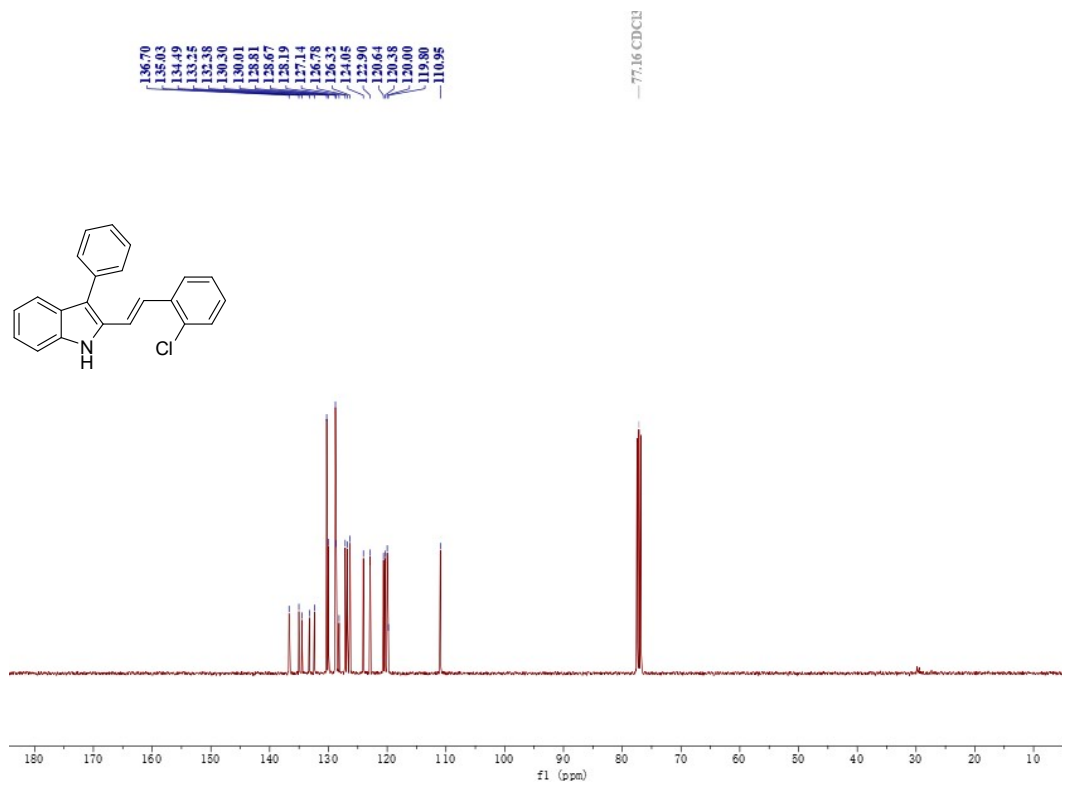

<sup>1</sup>H NMR of 13 (400 MHz, CDCl<sub>3</sub>)

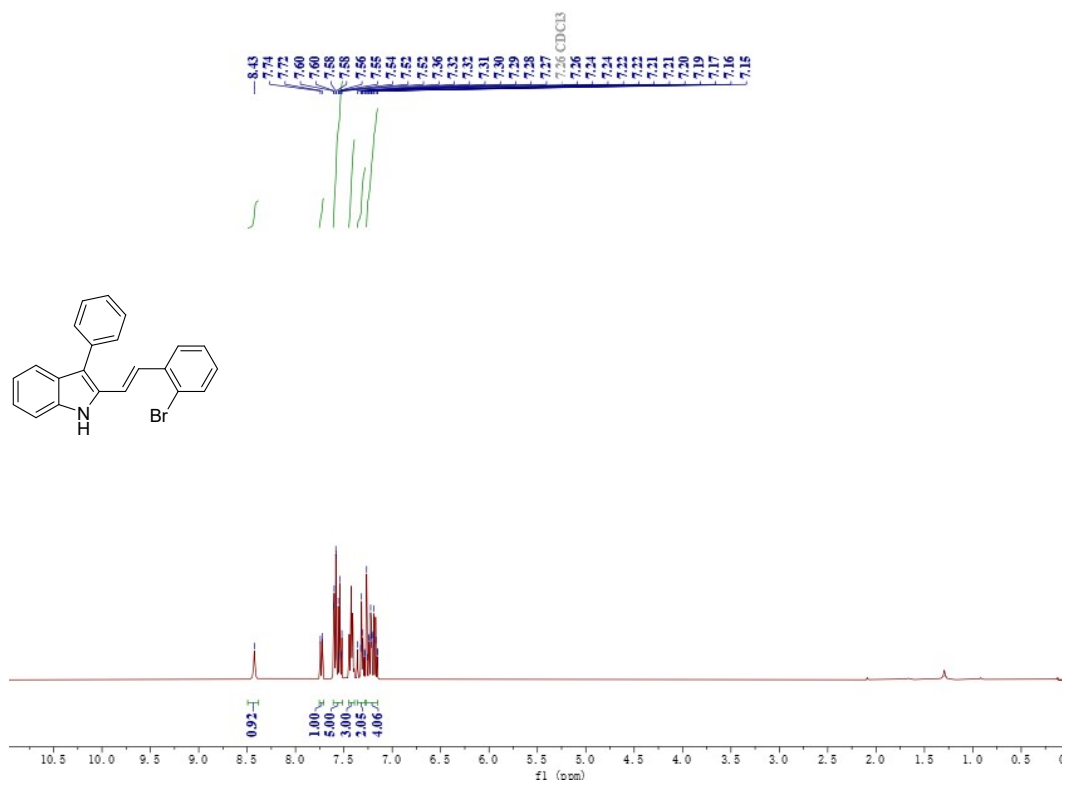

<sup>13</sup>C NMR of 13 (101 MHz, CDCl<sub>3</sub>)

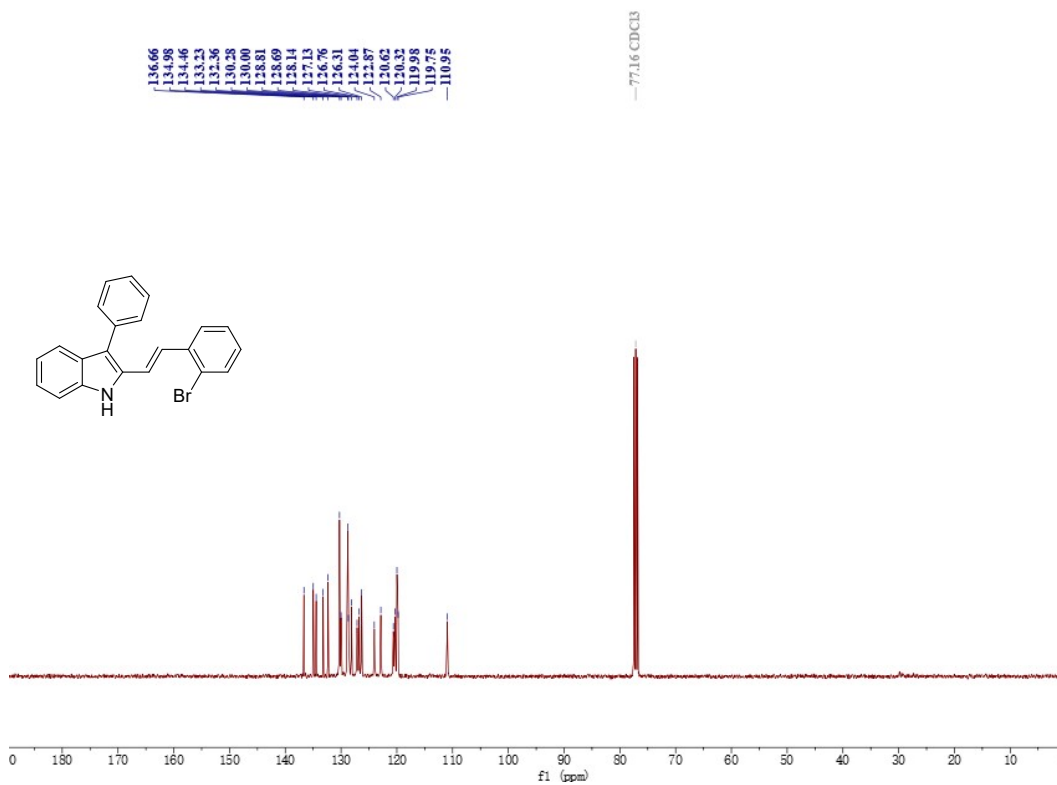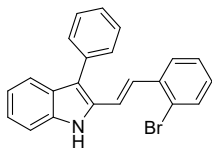

<sup>1</sup>H NMR of **14** (400 MHz, CDCl<sub>3</sub>)

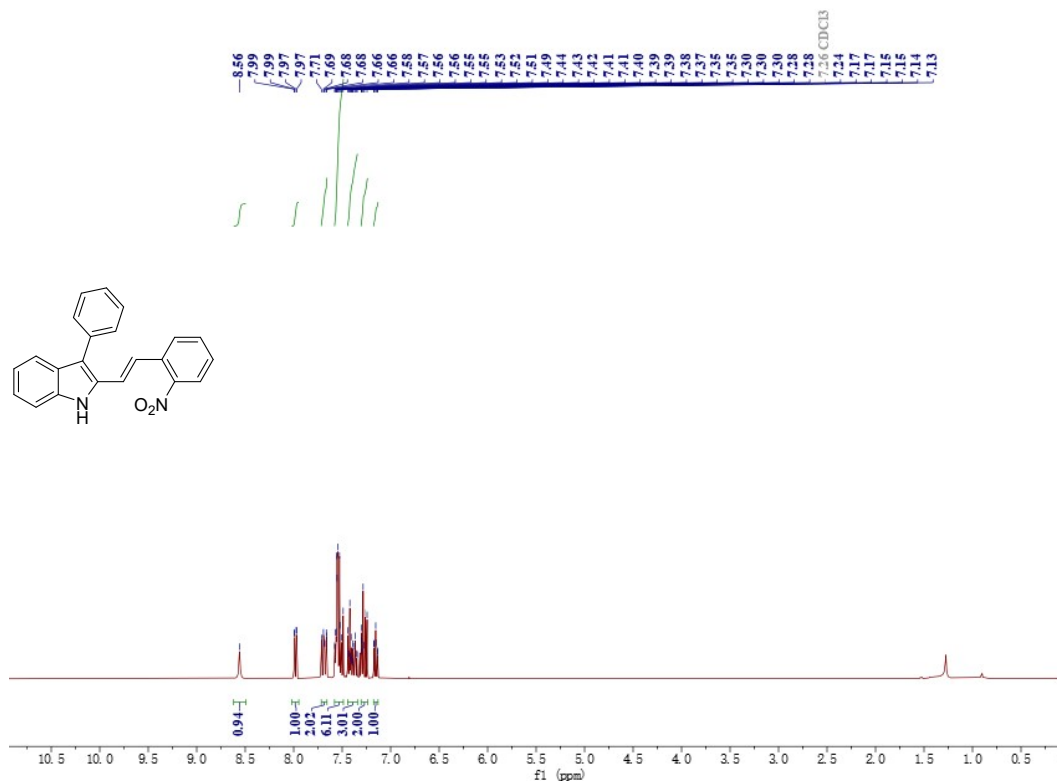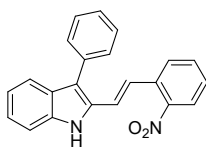

<sup>13</sup>C NMR of **14** (101 MHz, CDCl<sub>3</sub>)

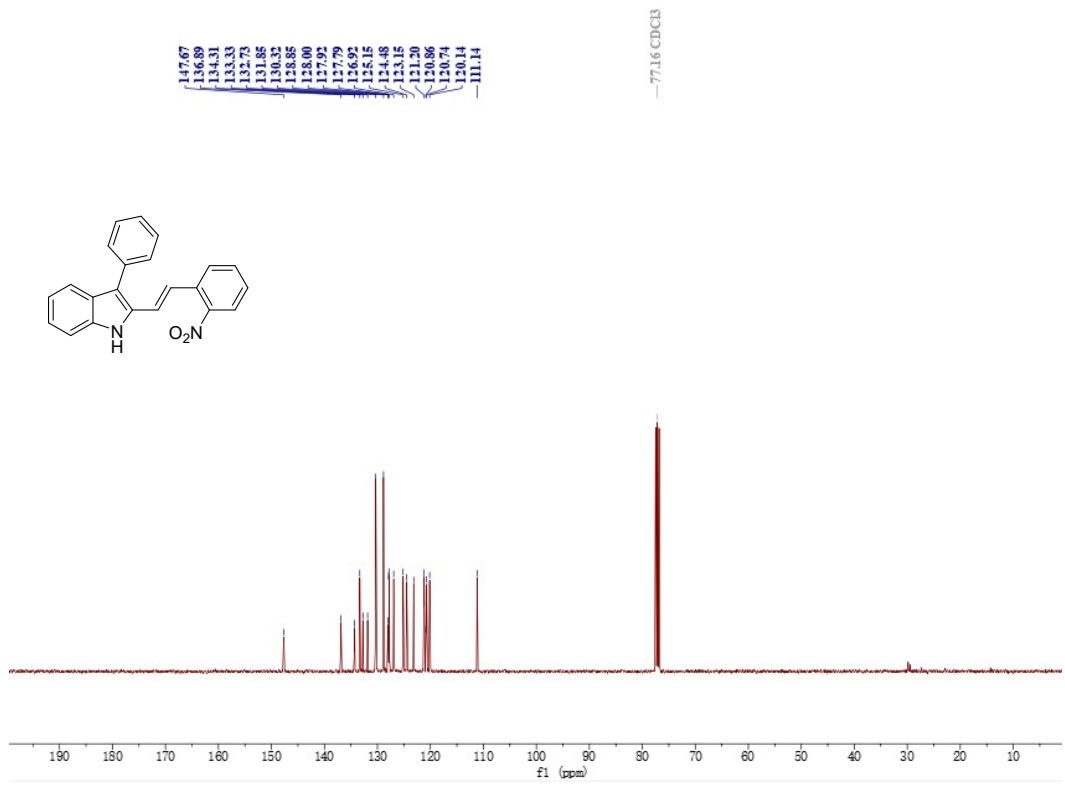

$^1\text{H}$  NMR of **15** (400 MHz, CDCl<sub>3</sub>)

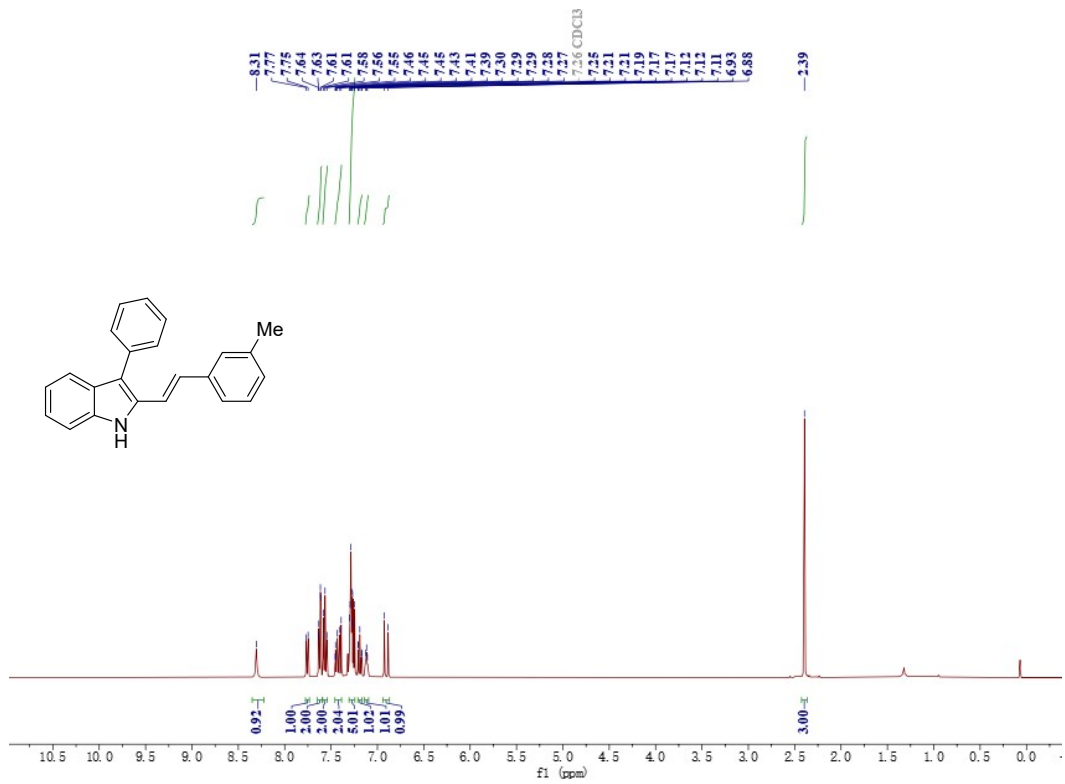

$^{13}\text{C}$  NMR of **15** (101 MHz, CDCl<sub>3</sub>)

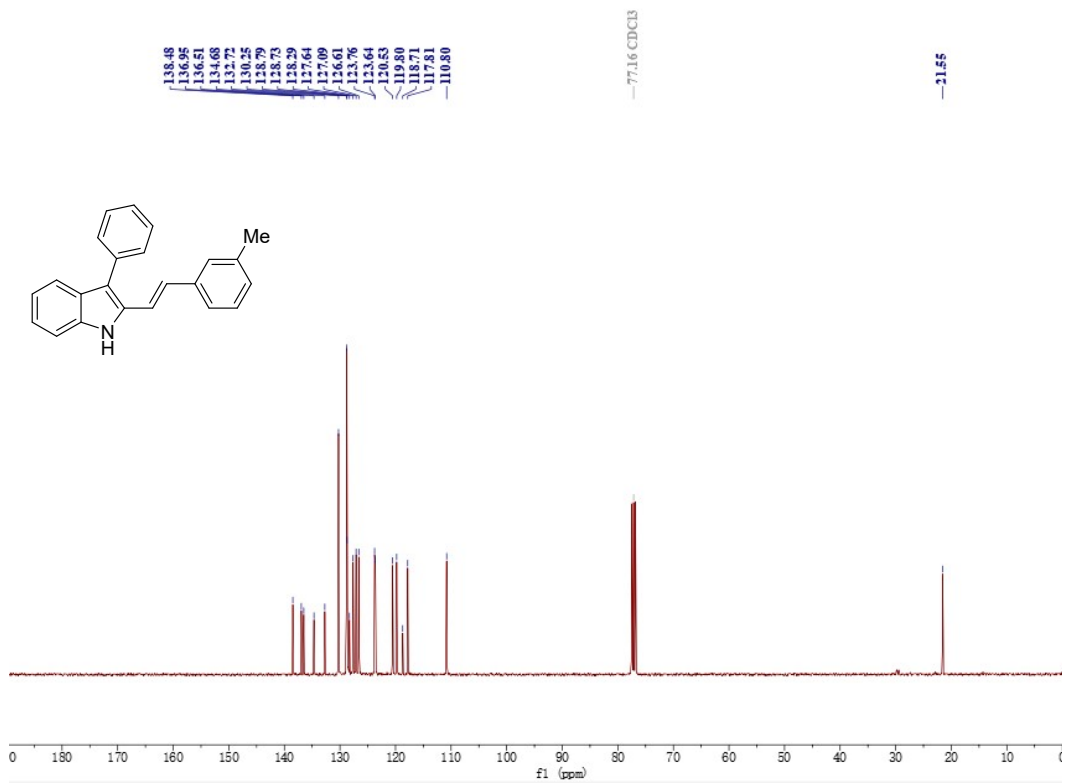

<sup>1</sup>H NMR of **16** (400 MHz, CDCl<sub>3</sub>)

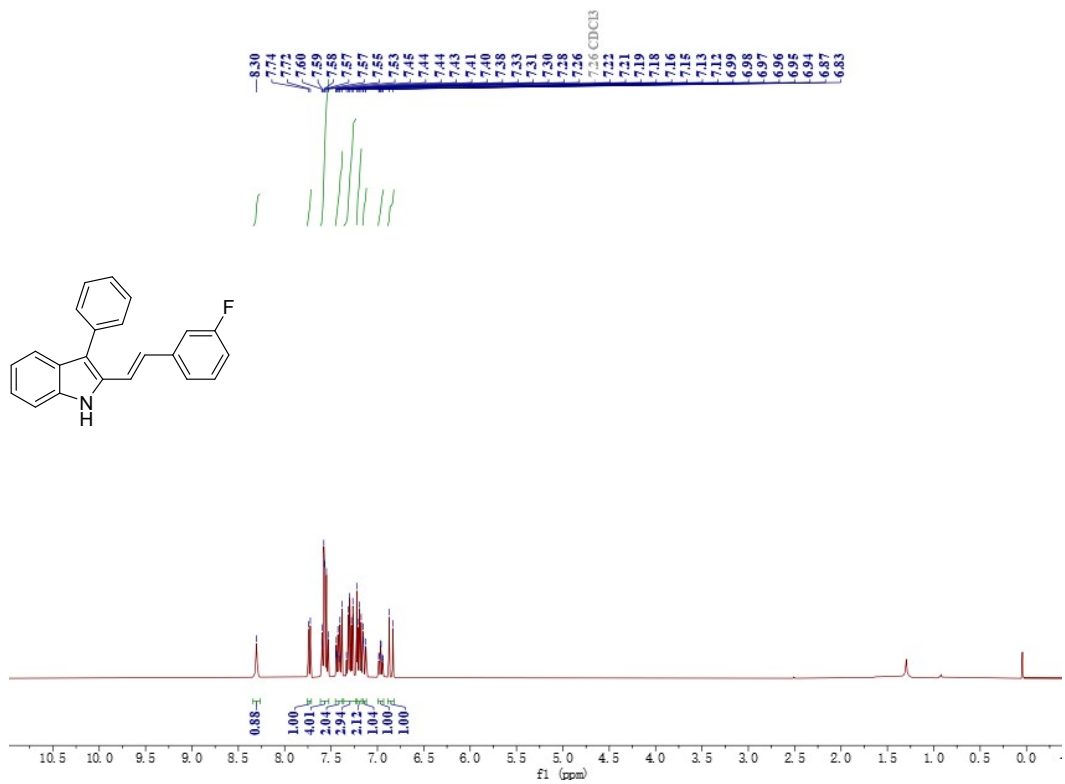

<sup>13</sup>C NMR of **16** (101 MHz, CDCl<sub>3</sub>)

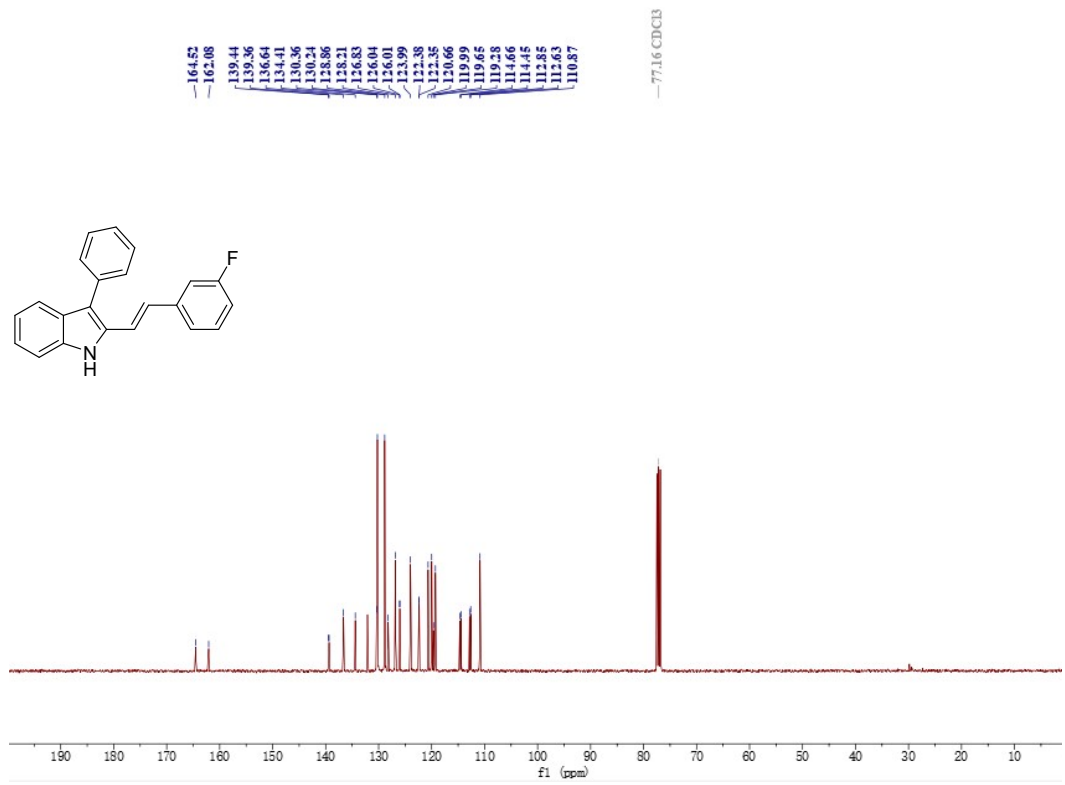

<sup>19</sup>F NMR of **16** (376 MHz, CDCl<sub>3</sub>)

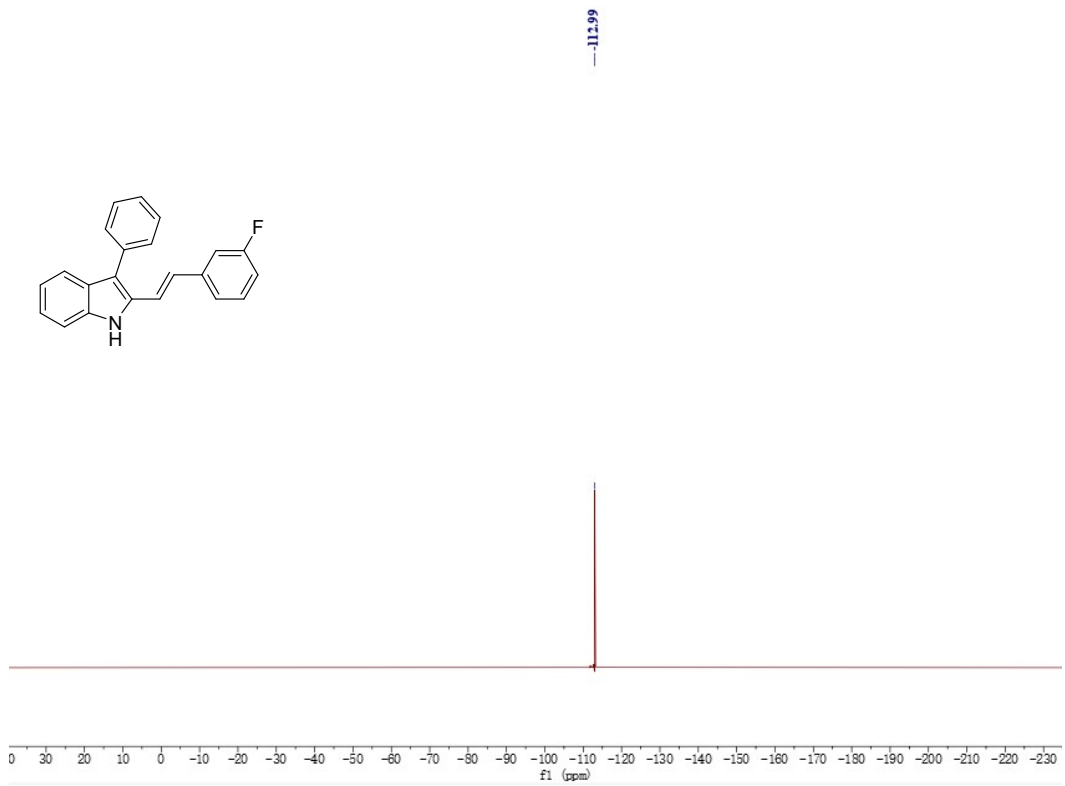

<sup>1</sup>H NMR of **17** (400 MHz, CDCl<sub>3</sub>)

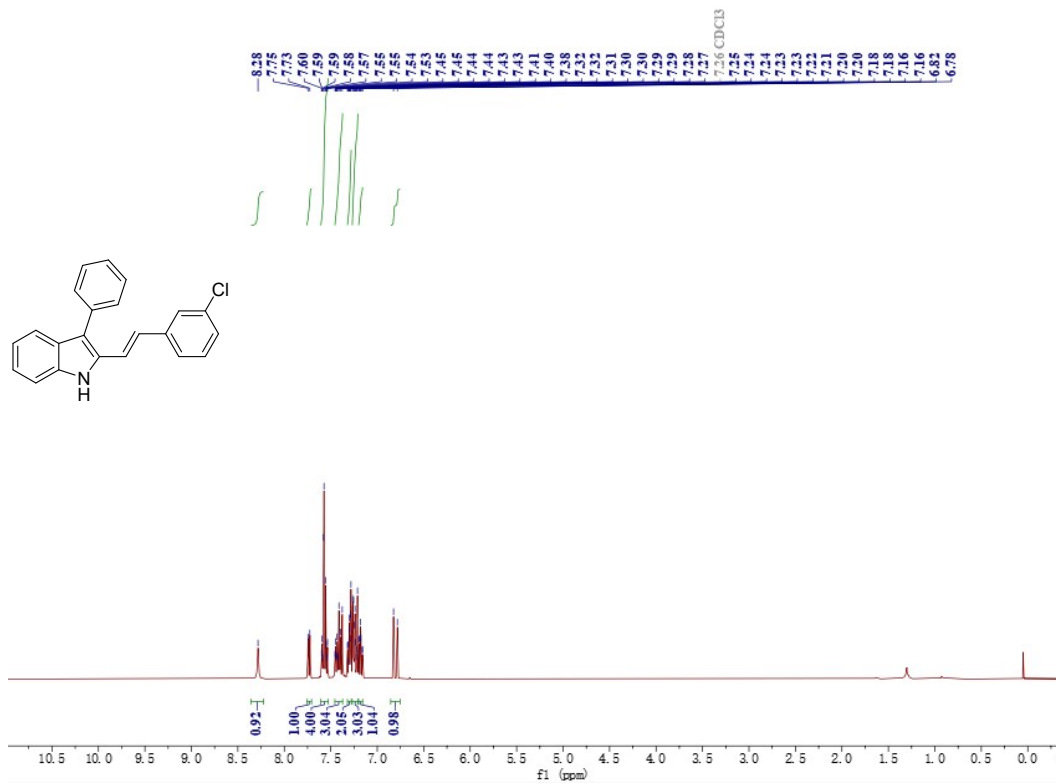

$^{13}\text{C}$  NMR of **17** (101 MHz,  $\text{CDCl}_3$ )

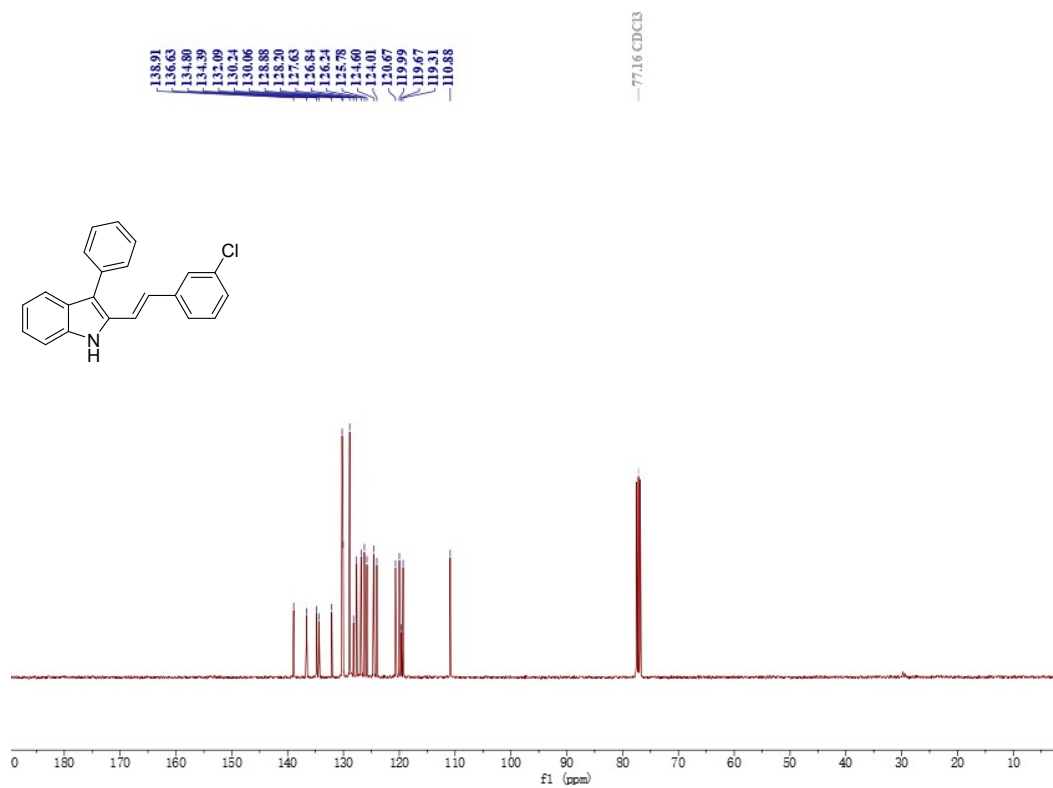

$^1\text{H}$  NMR of **18** (400 MHz,  $\text{CDCl}_3$ )



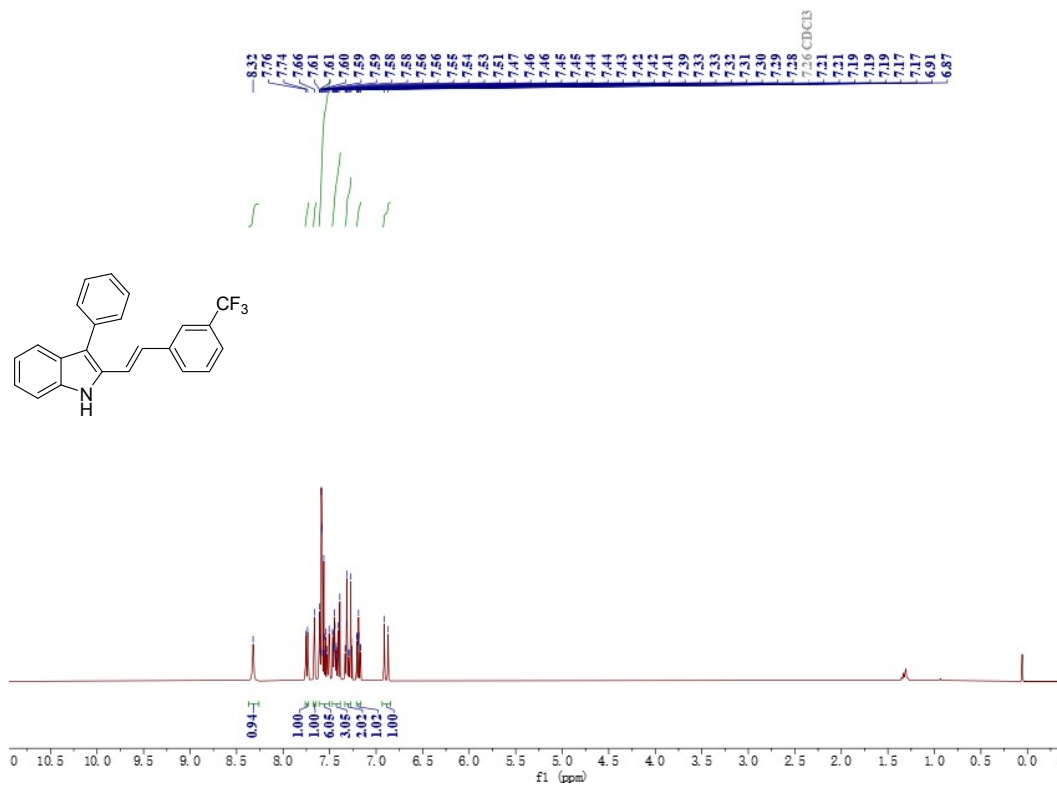

<sup>13</sup>C NMR of **18** (101 MHz, CDCl<sub>3</sub>)

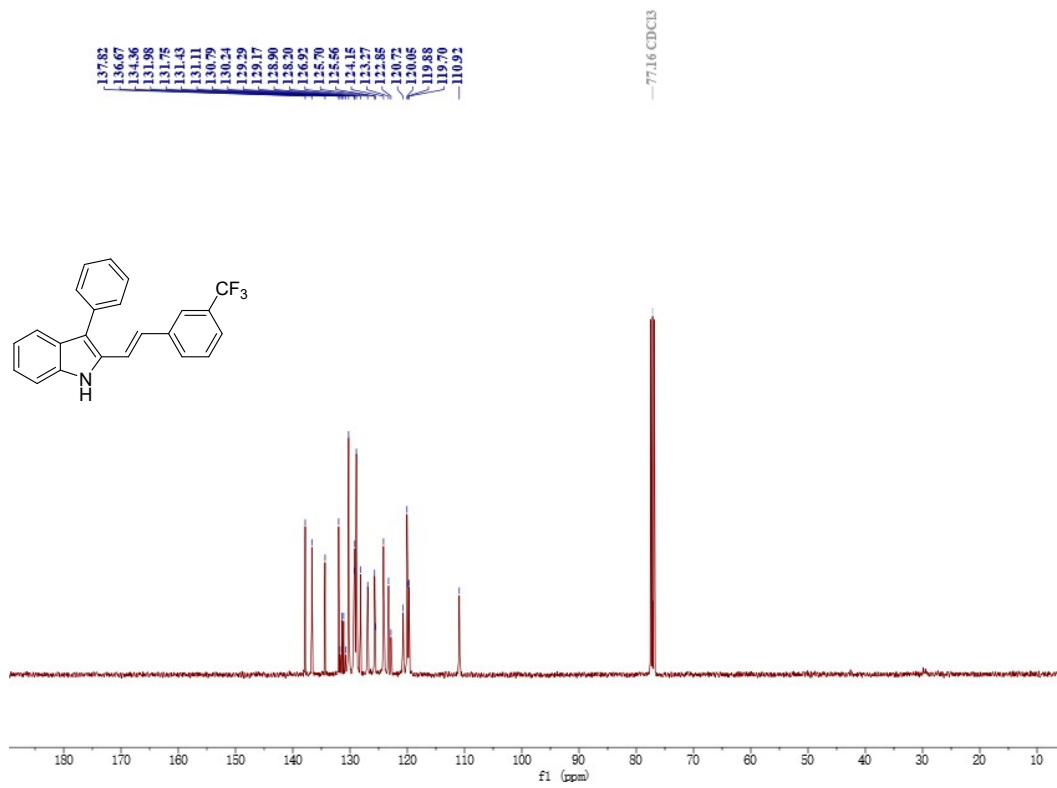

<sup>19</sup>F NMR of **18** (376 MHz, CDCl<sub>3</sub>)

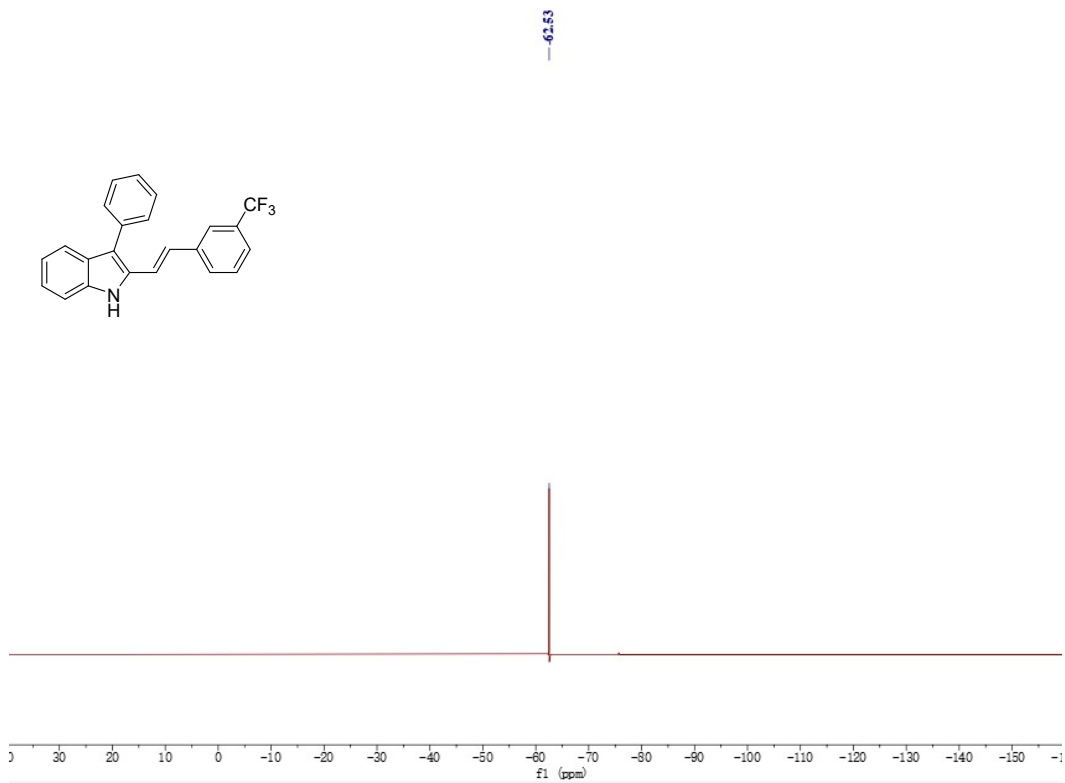

$^1\text{H}$  NMR of **19** (400 MHz,  $\text{CDCl}_3$ )

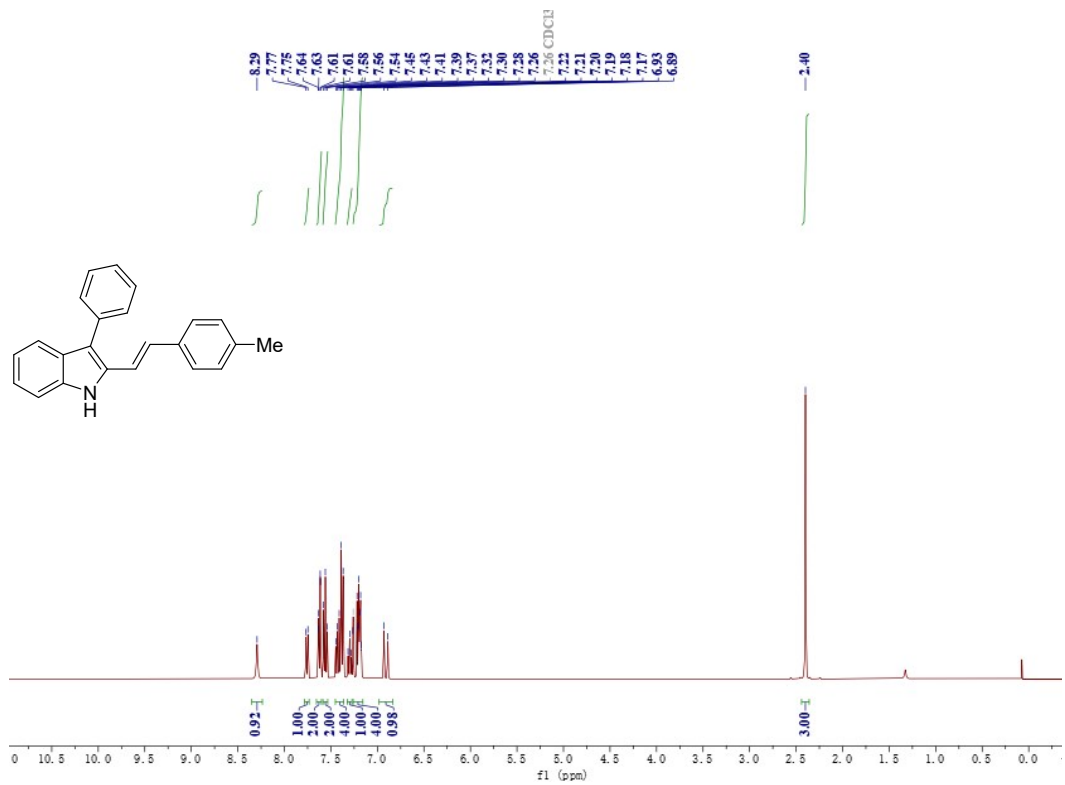

$^{13}\text{C}$  NMR of **19** (101 MHz,  $\text{CDCl}_3$ )

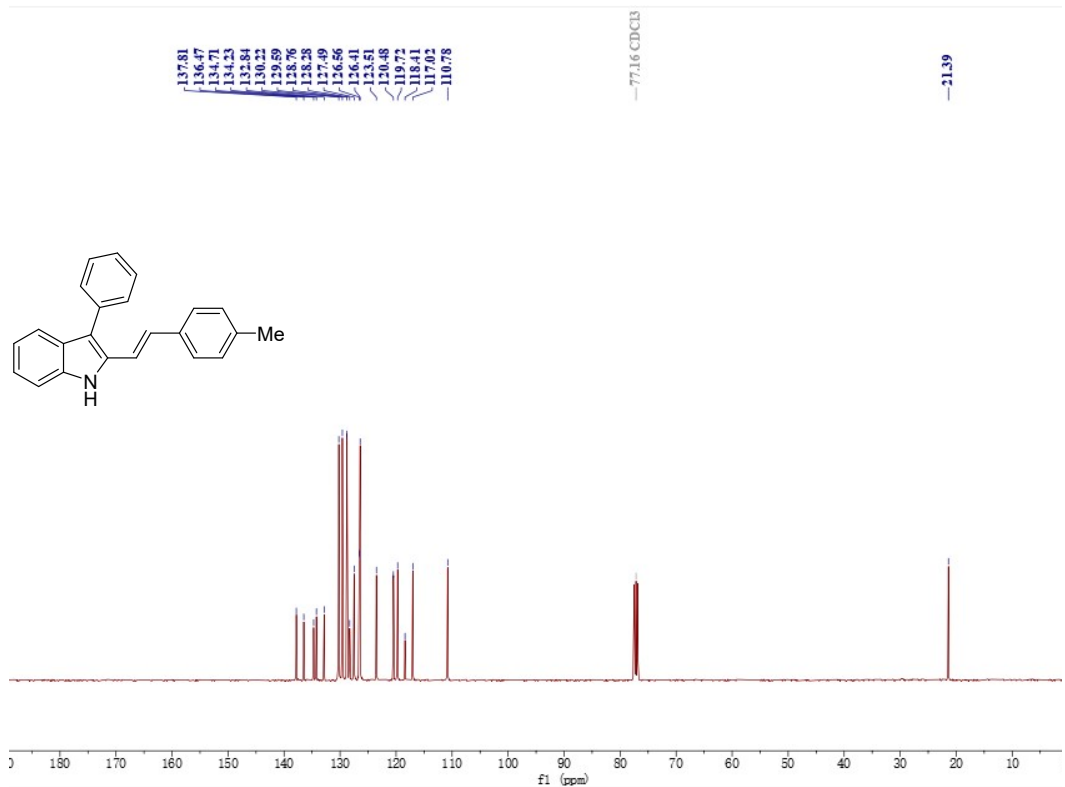

<sup>1</sup>H NMR of **20** (400 MHz, CDCl<sub>3</sub>)

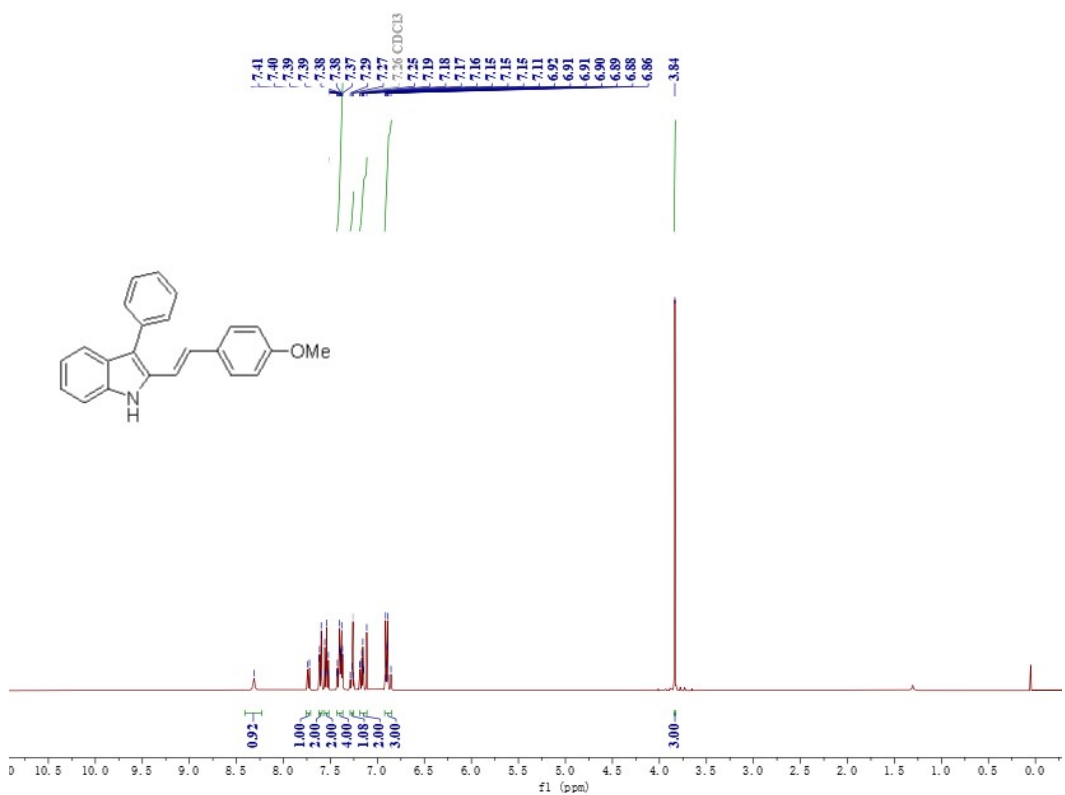

<sup>13</sup>C NMR of **20** (101 MHz, CDCl<sub>3</sub>)

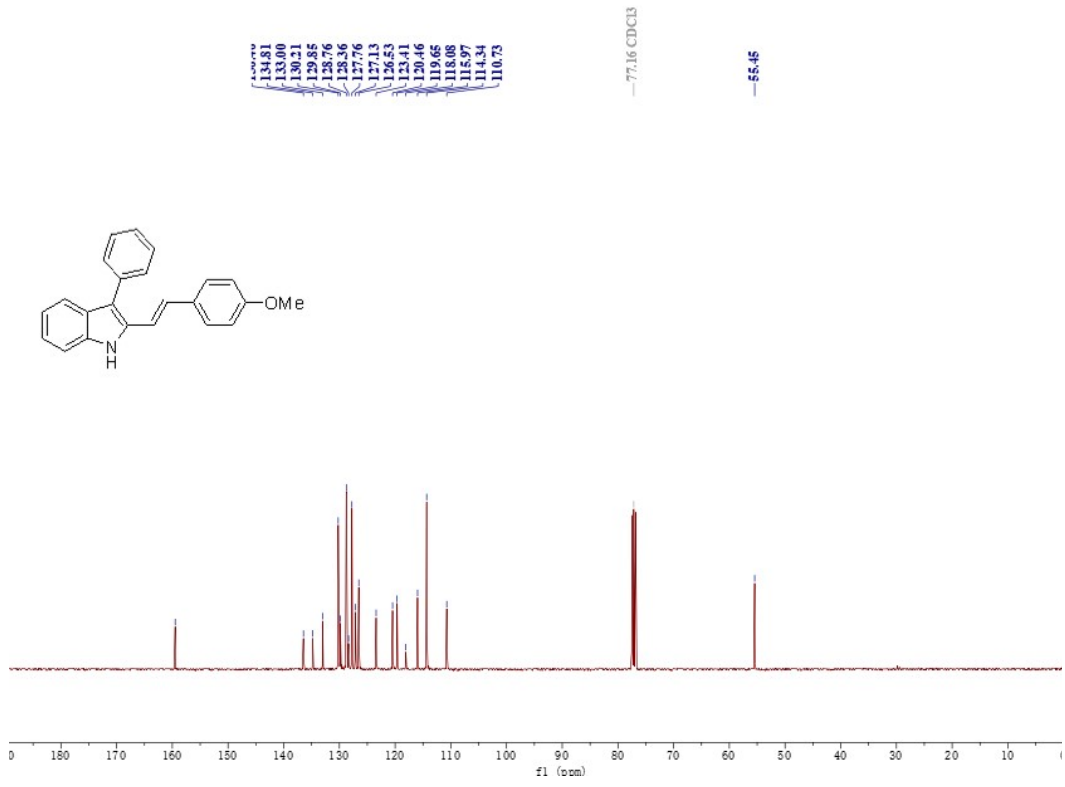

<sup>1</sup>H NMR of **21** (400 MHz, CDCl<sub>3</sub>)

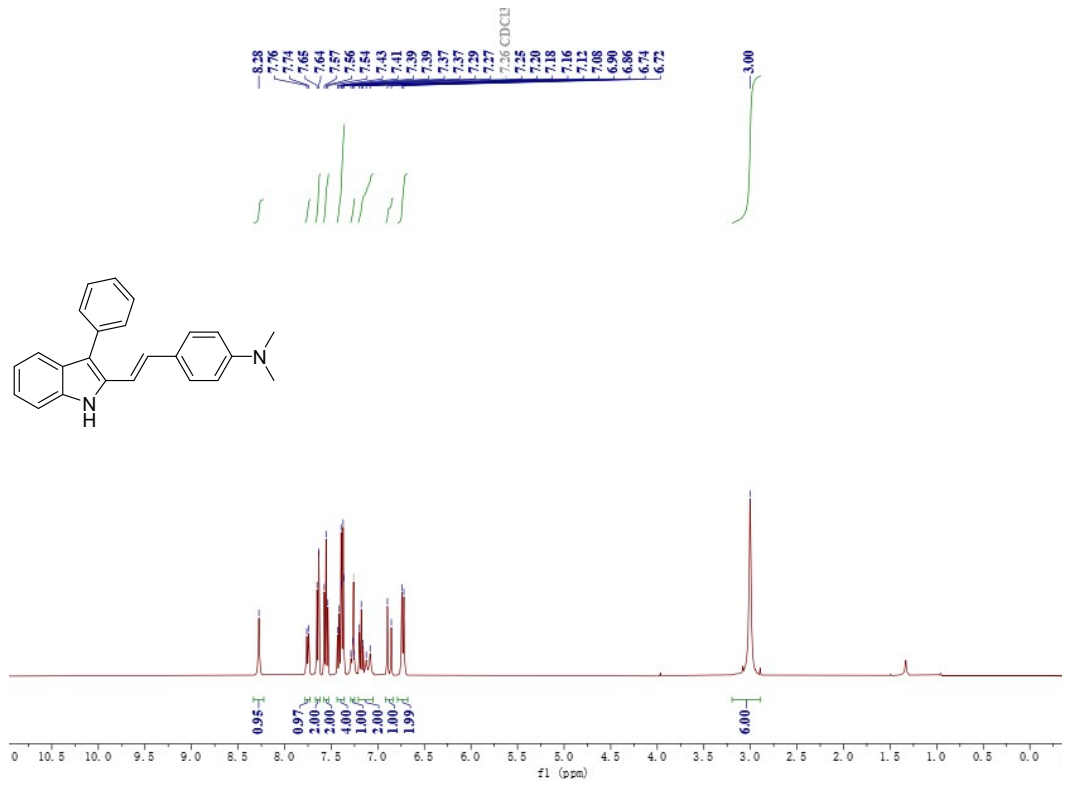

<sup>13</sup>C NMR of **21** (101 MHz, CDCl<sub>3</sub>)

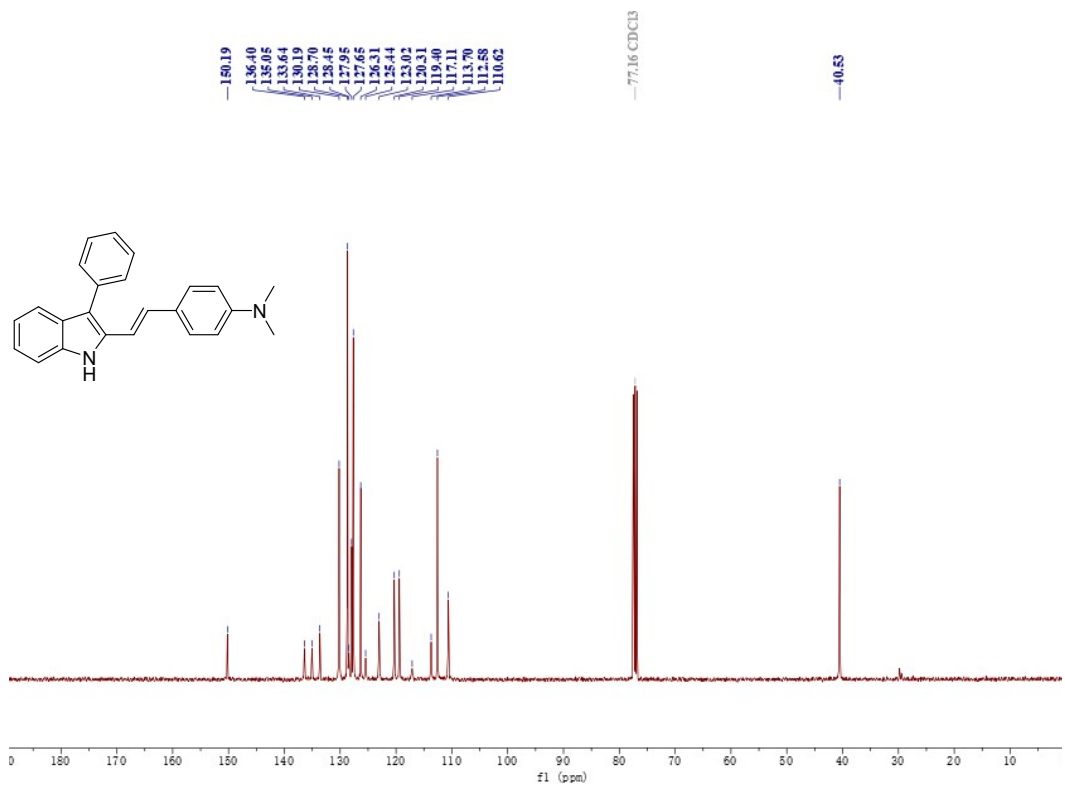

<sup>1</sup>H NMR of **22** (400 MHz, CDCl<sub>3</sub>)

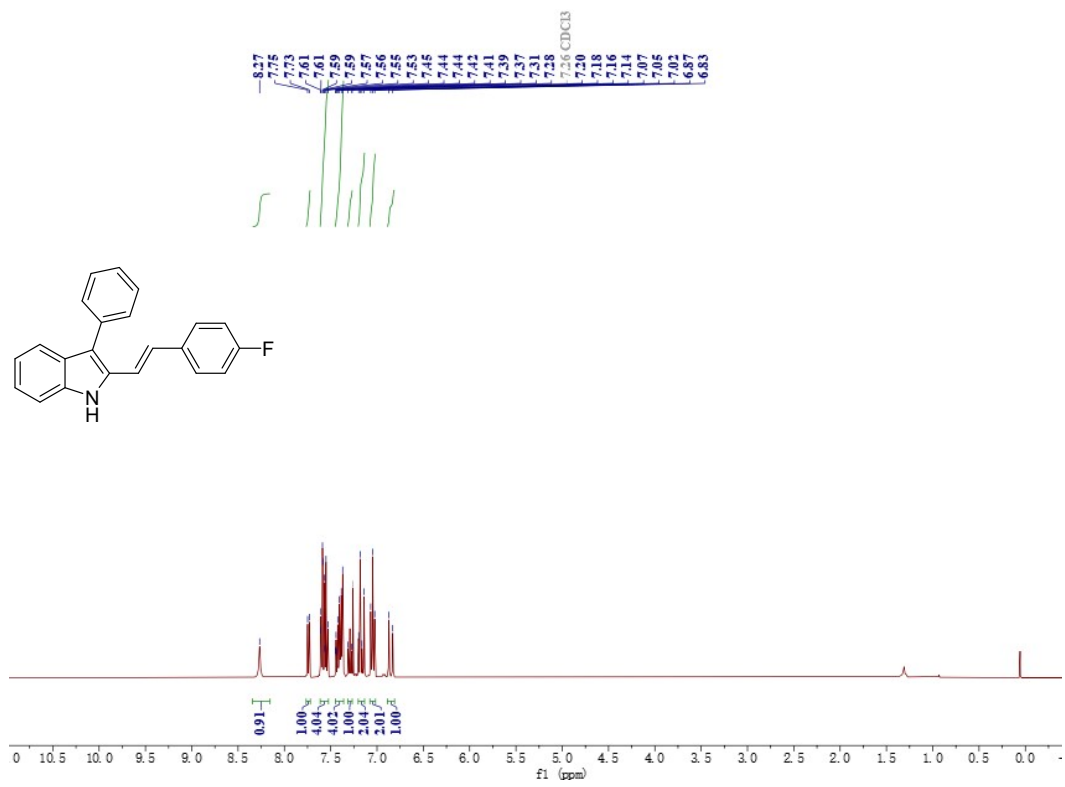

<sup>13</sup>C NMR of **22** (101 MHz, CDCl<sub>3</sub>)

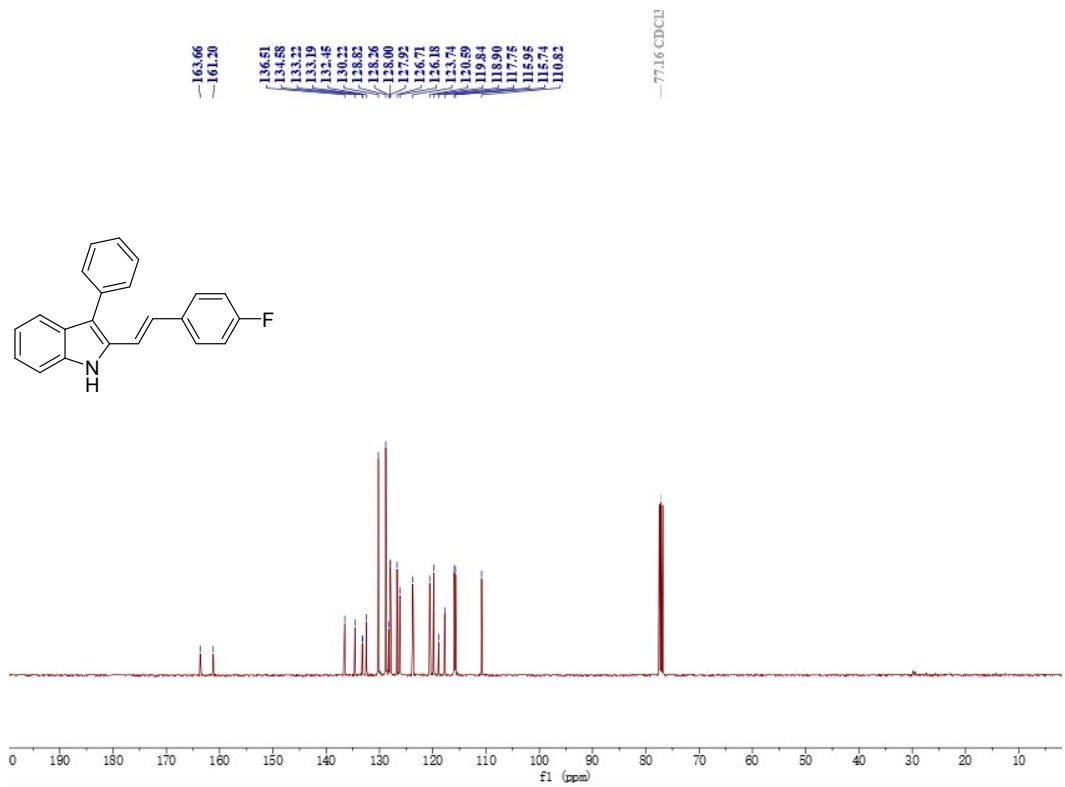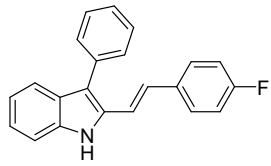

<sup>19</sup>F NMR of **22** (376 MHz, CDCl<sub>3</sub>)

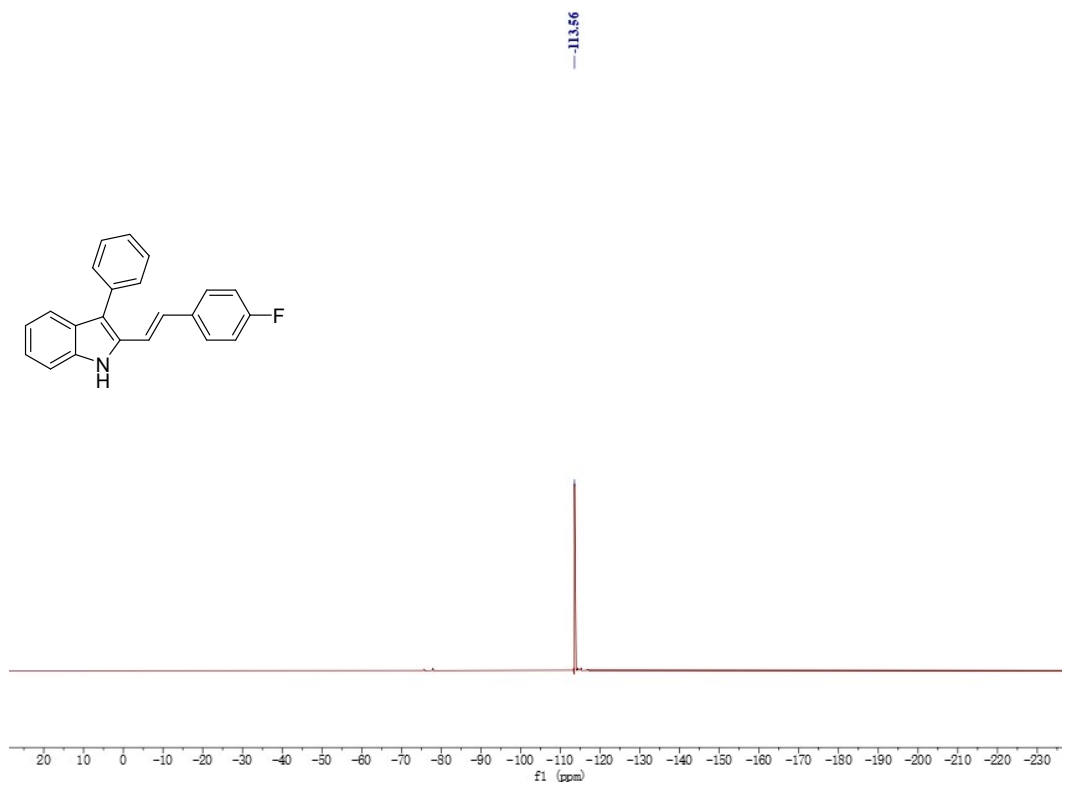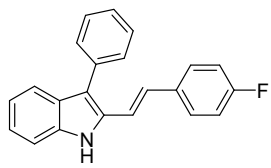

<sup>1</sup>H NMR of **23** (400 MHz, CDCl<sub>3</sub>)

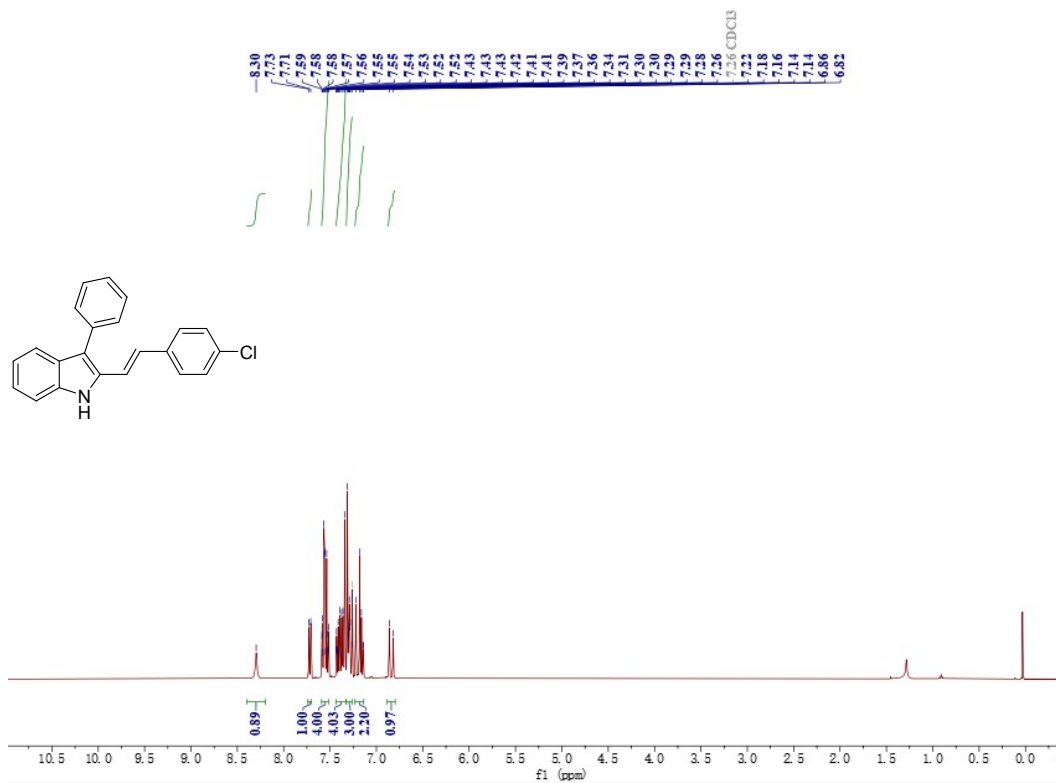

$^{13}\text{C}$  NMR of **23** (101 MHz,  $\text{CDCl}_3$ )

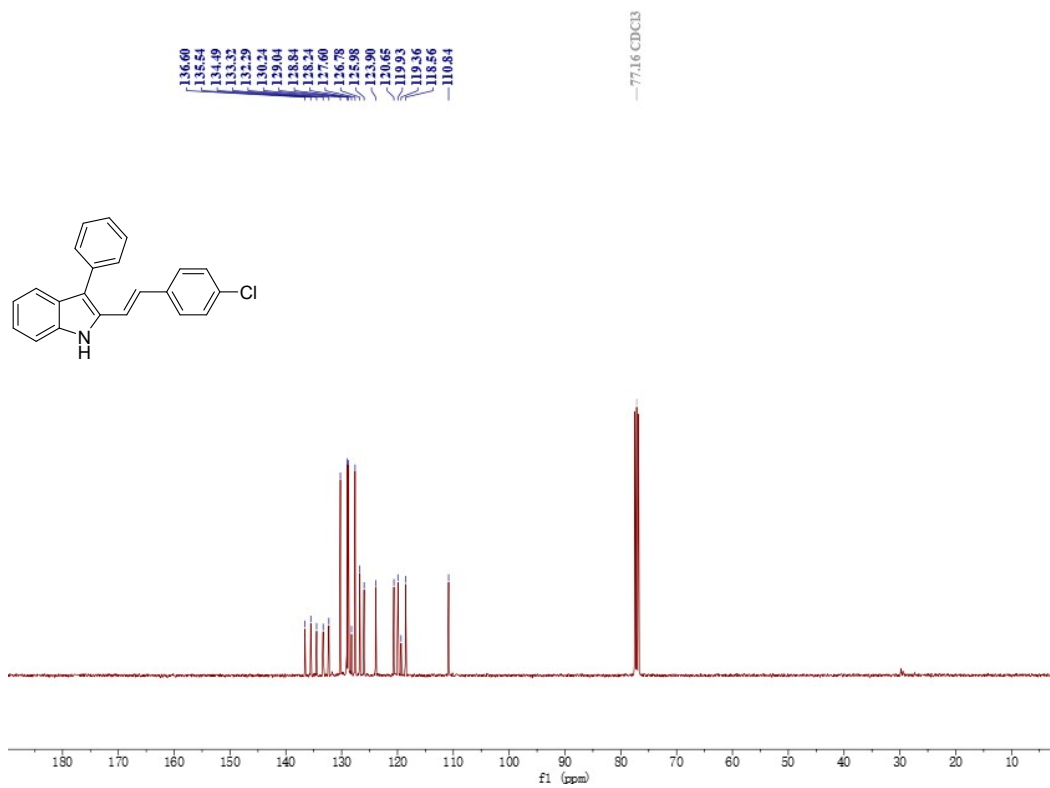

$^1\text{H}$  NMR of **24** (400 MHz,  $\text{CDCl}_3$ )

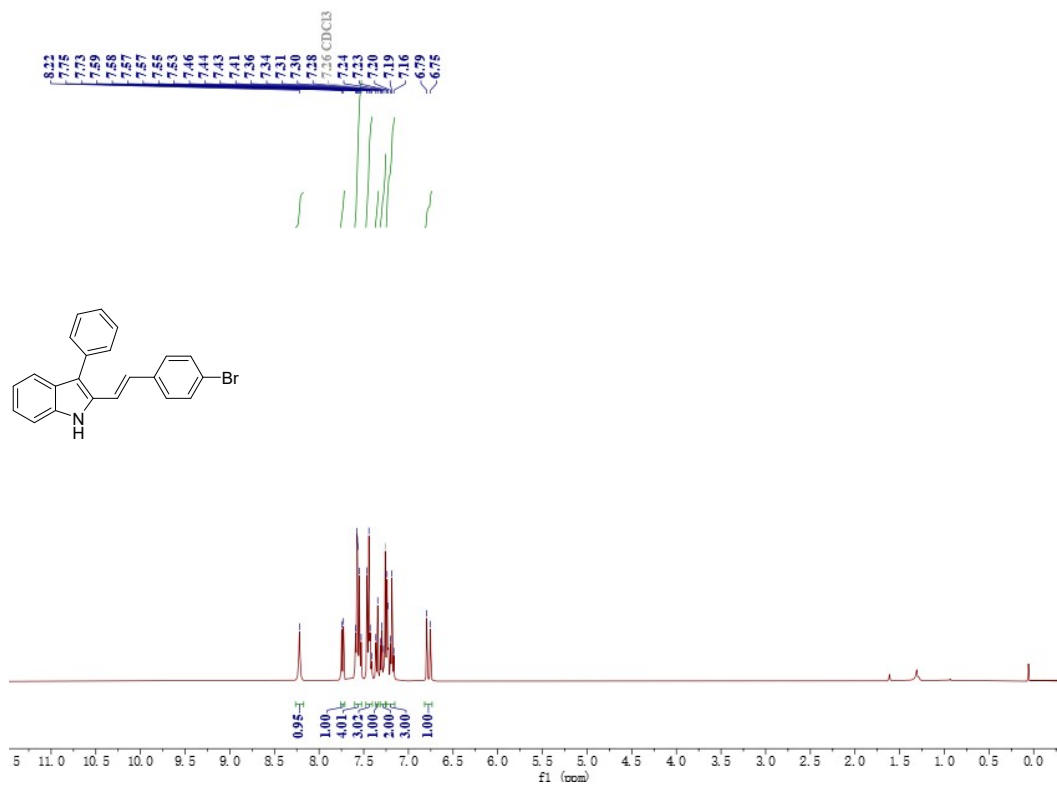

**<sup>13</sup>C NMR of 24 (101 MHz, CDCl<sub>3</sub>)**

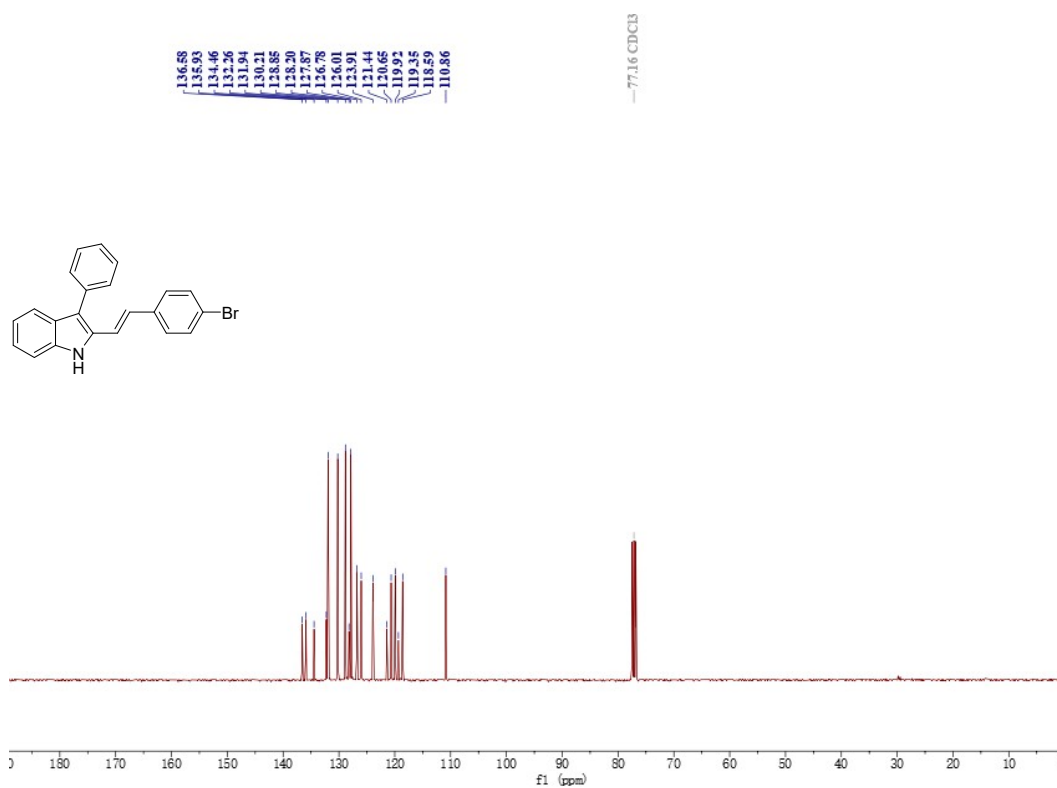

**<sup>1</sup>H NMR of 25 (400 MHz, CDCl<sub>3</sub>)**



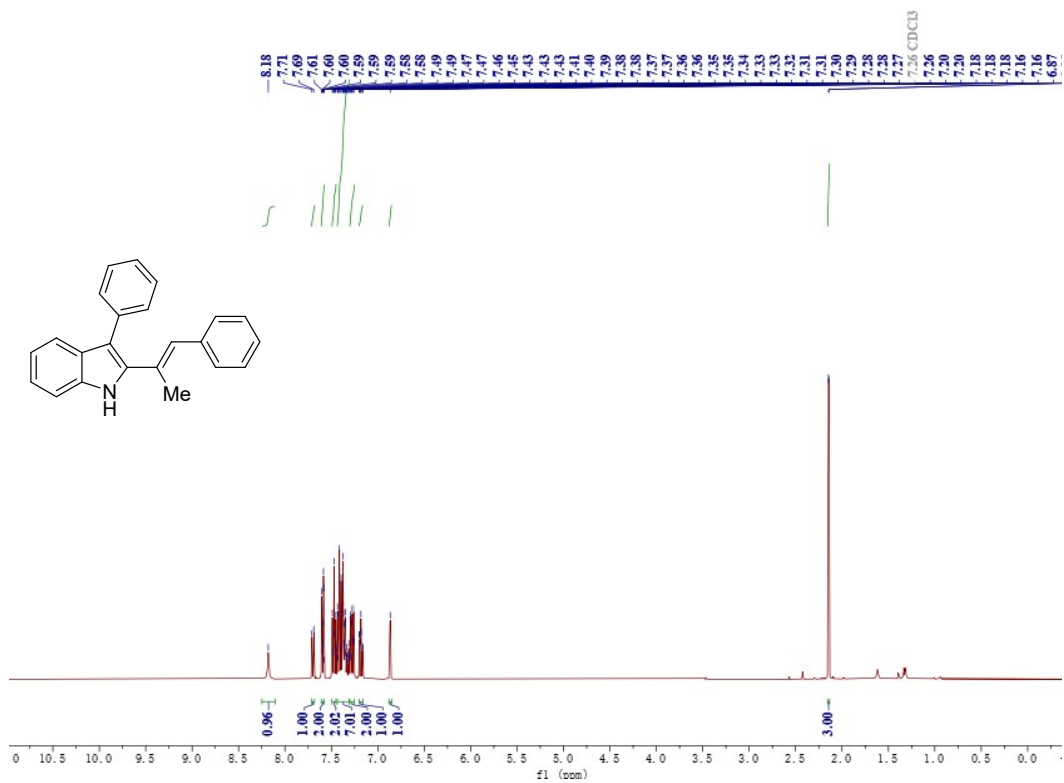

**<sup>13</sup>C NMR of 25 (101 MHz, CDCl<sub>3</sub>)**

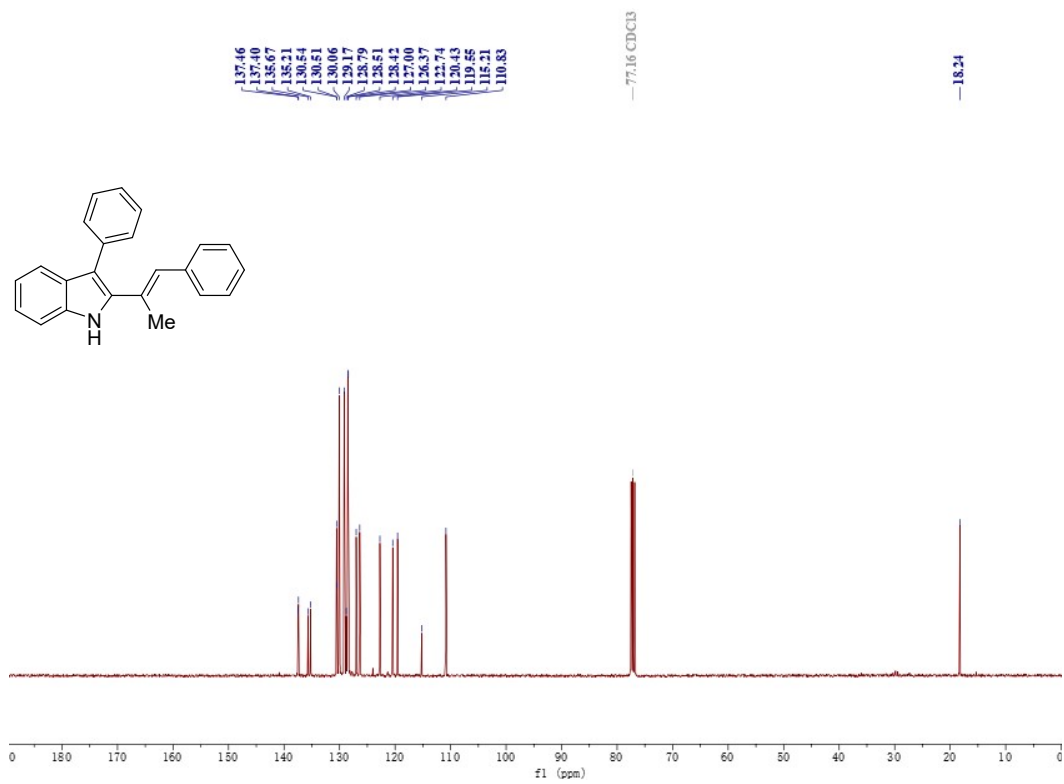

**<sup>1</sup>H NMR of 26 (400 MHz, CDCl<sub>3</sub>)**



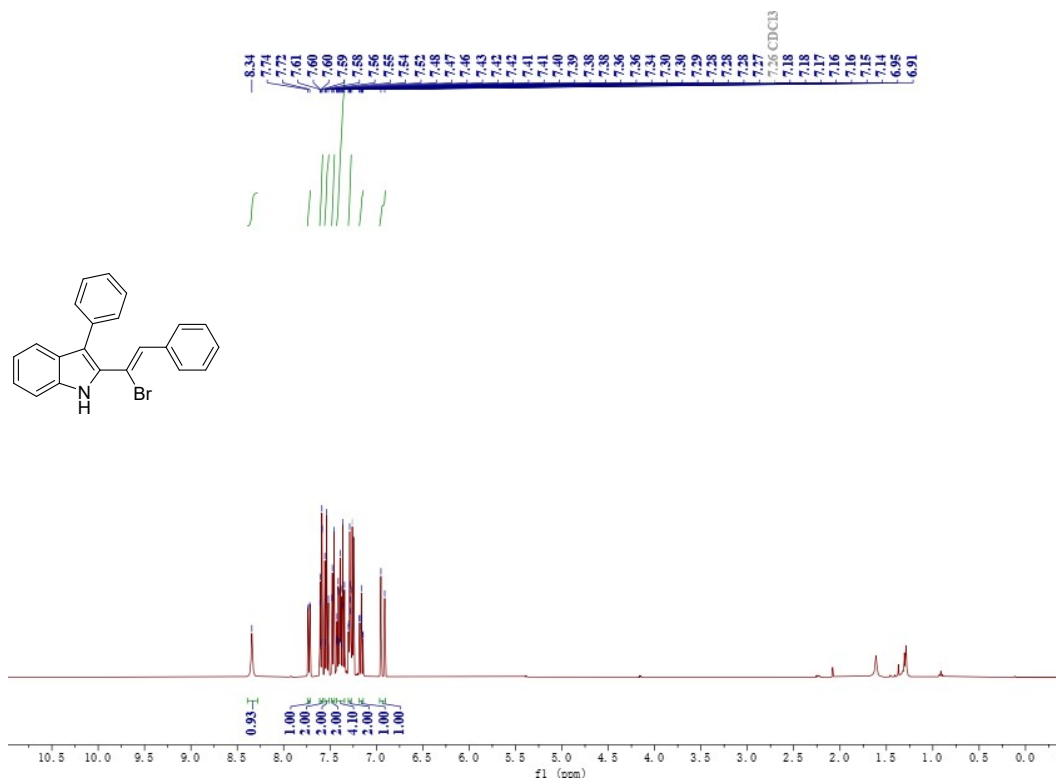

<sup>13</sup>C NMR of **27** (101 MHz, CDCl<sub>3</sub>)

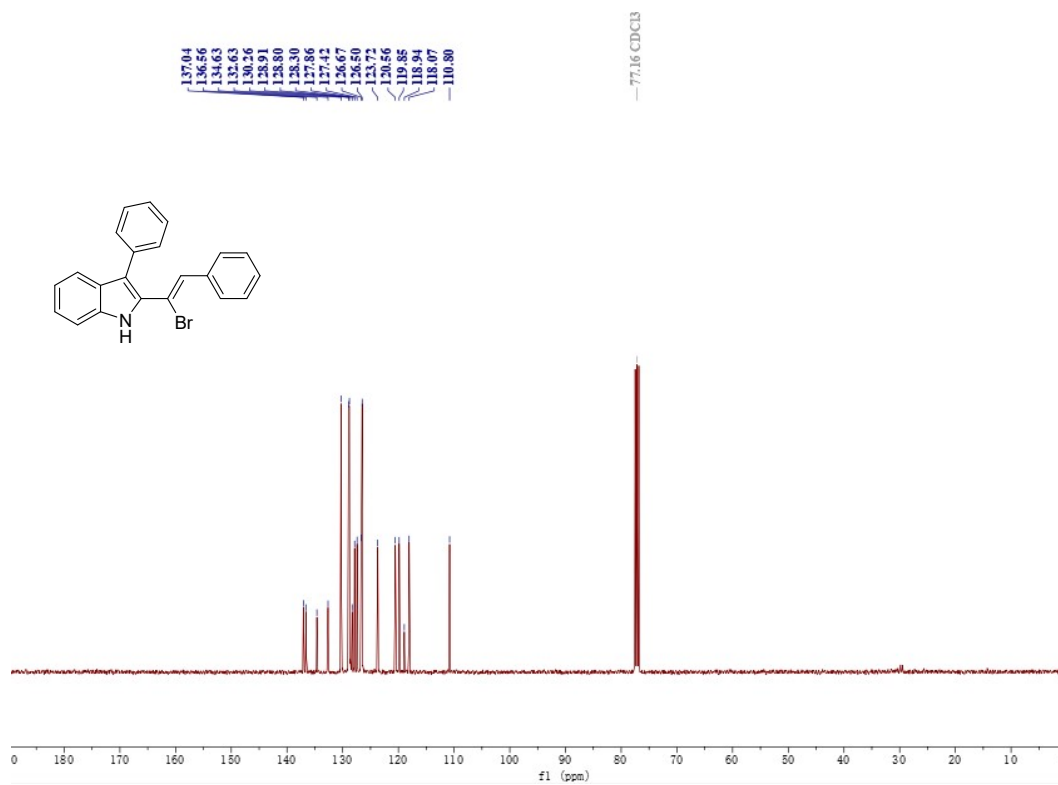

<sup>1</sup>H NMR of **28** (400 MHz, CDCl<sub>3</sub>)

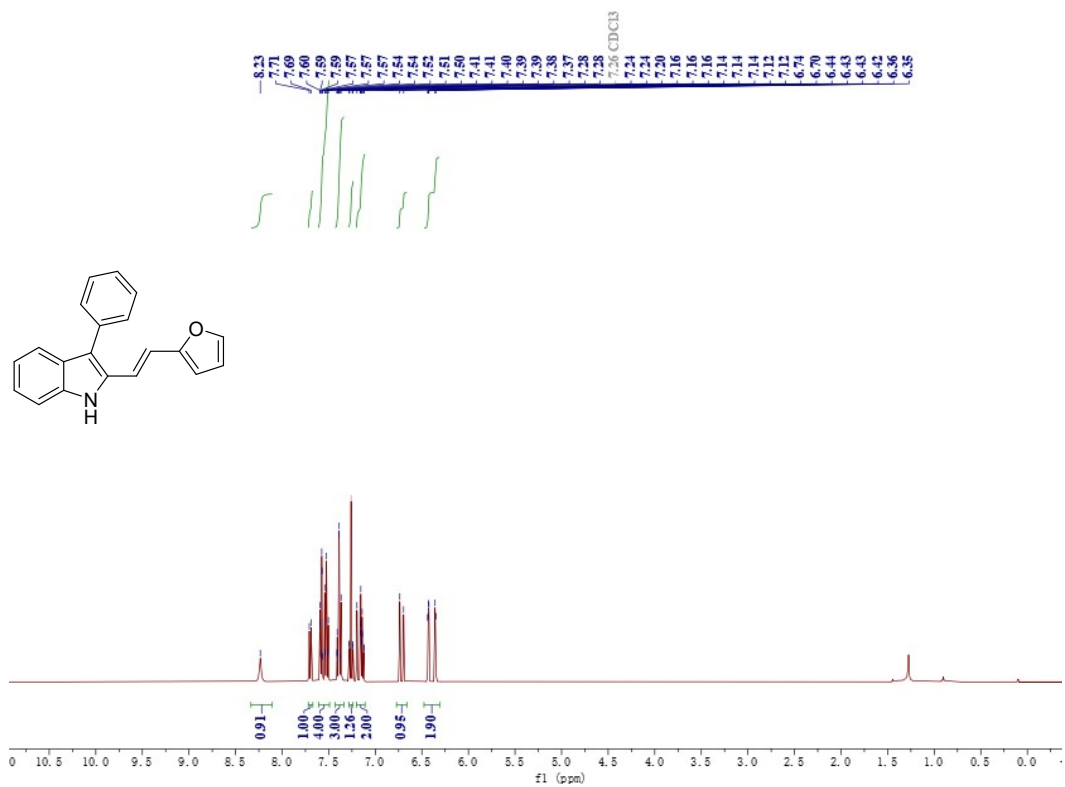

**<sup>13</sup>C NMR of 28 (101 MHz, CDCl<sub>3</sub>)**

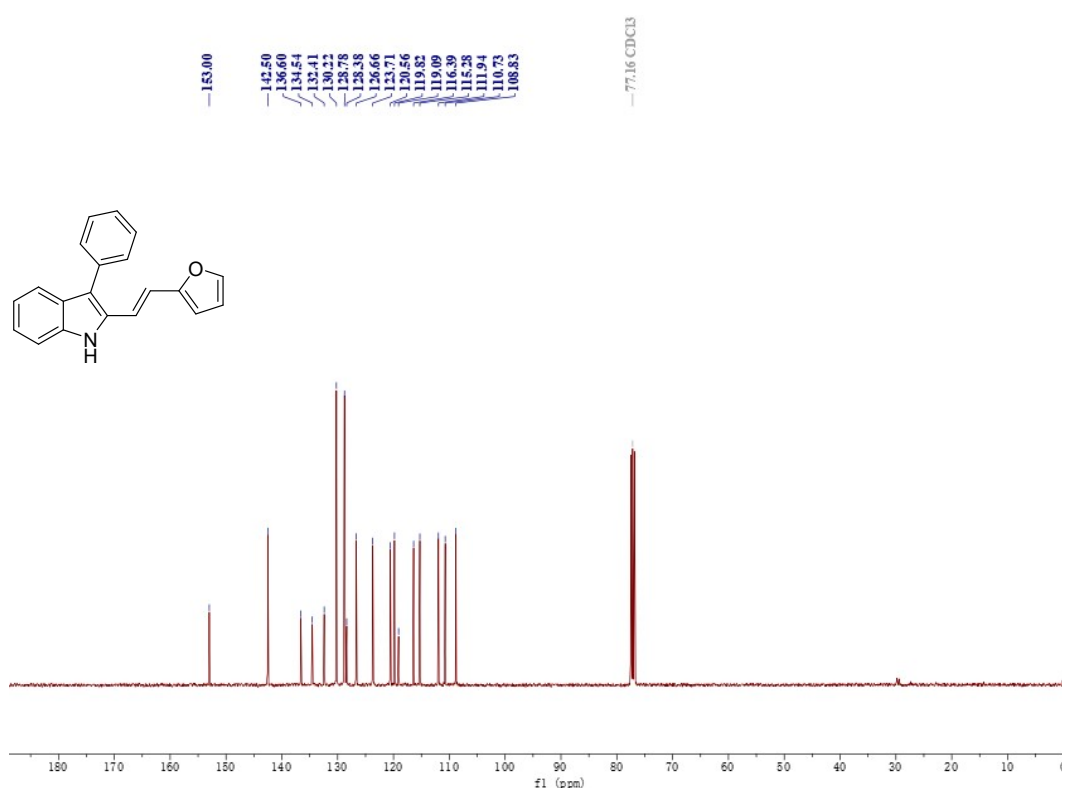

**<sup>1</sup>H NMR of 29 (400 MHz, CDCl<sub>3</sub>)**

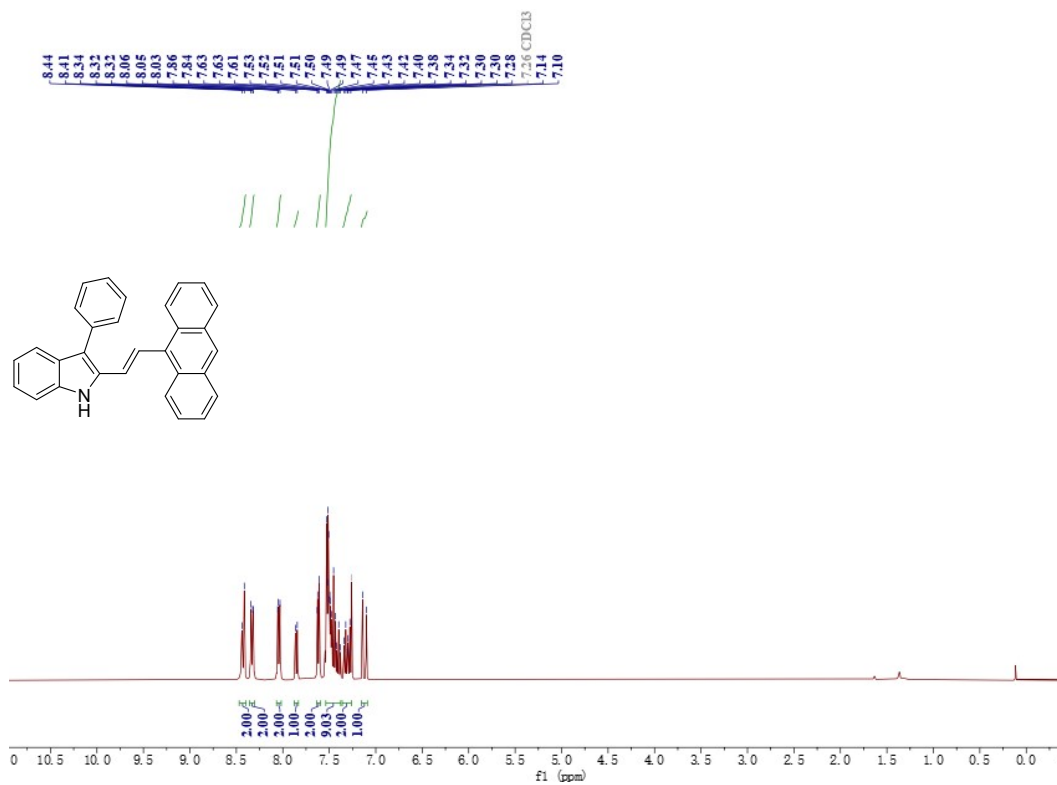

<sup>13</sup>C NMR of **29** (101 MHz, CDCl<sub>3</sub>)

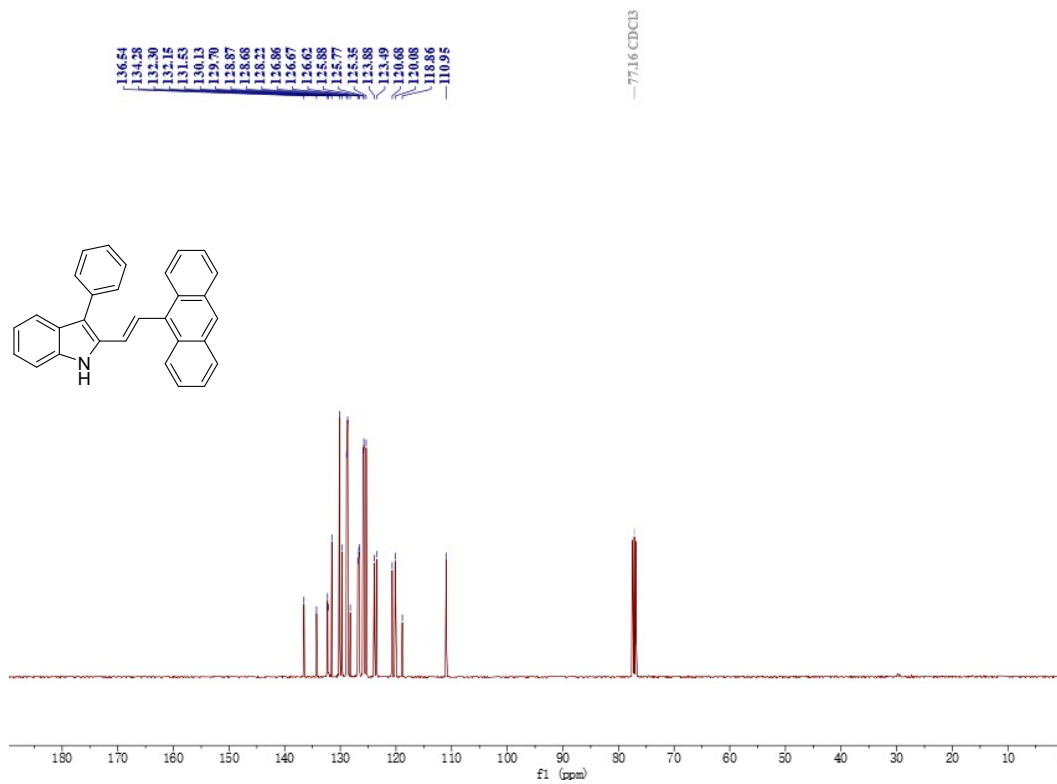

<sup>1</sup>H NMR of **30** (400 MHz, CDCl<sub>3</sub>)

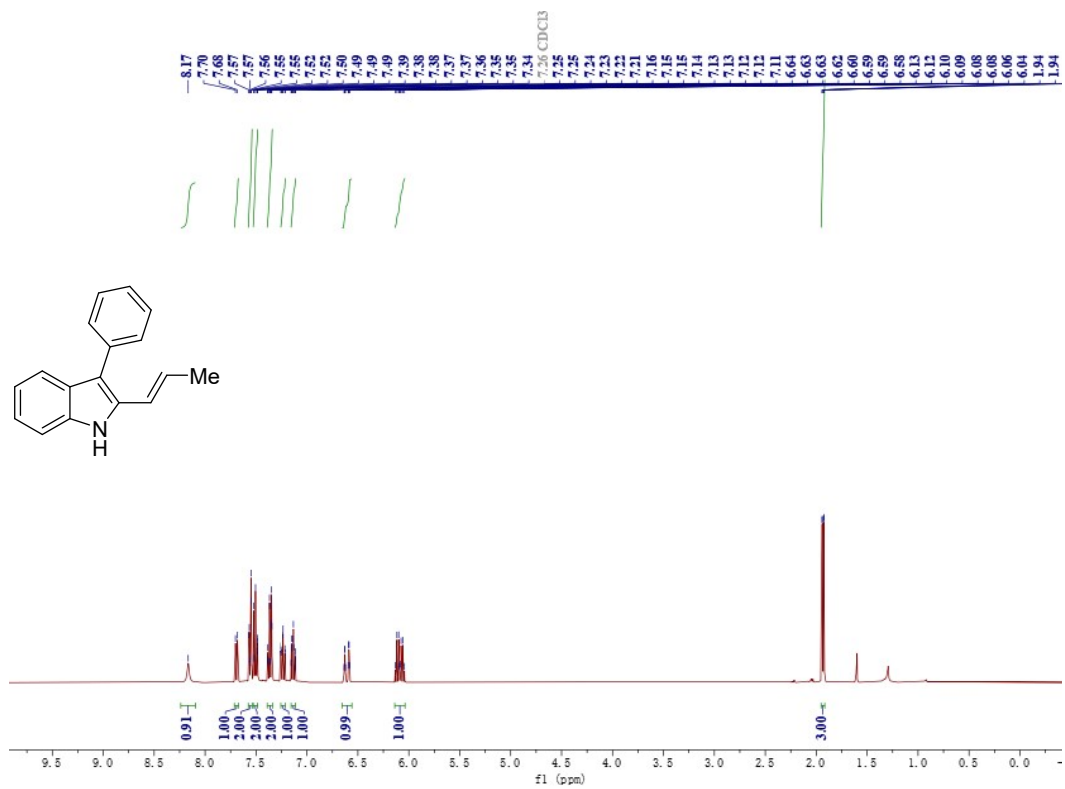

<sup>13</sup>C NMR of **30** (101 MHz, CDCl<sub>3</sub>)

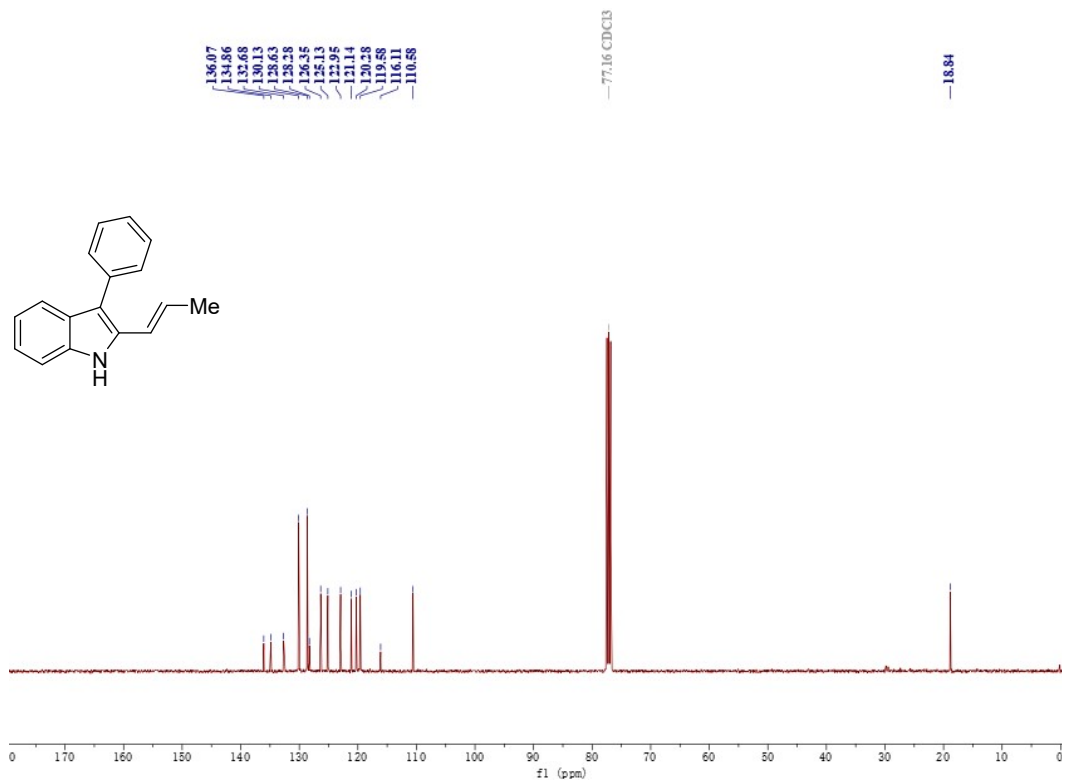

<sup>1</sup>H NMR of **31** (400 MHz, CDCl<sub>3</sub>)

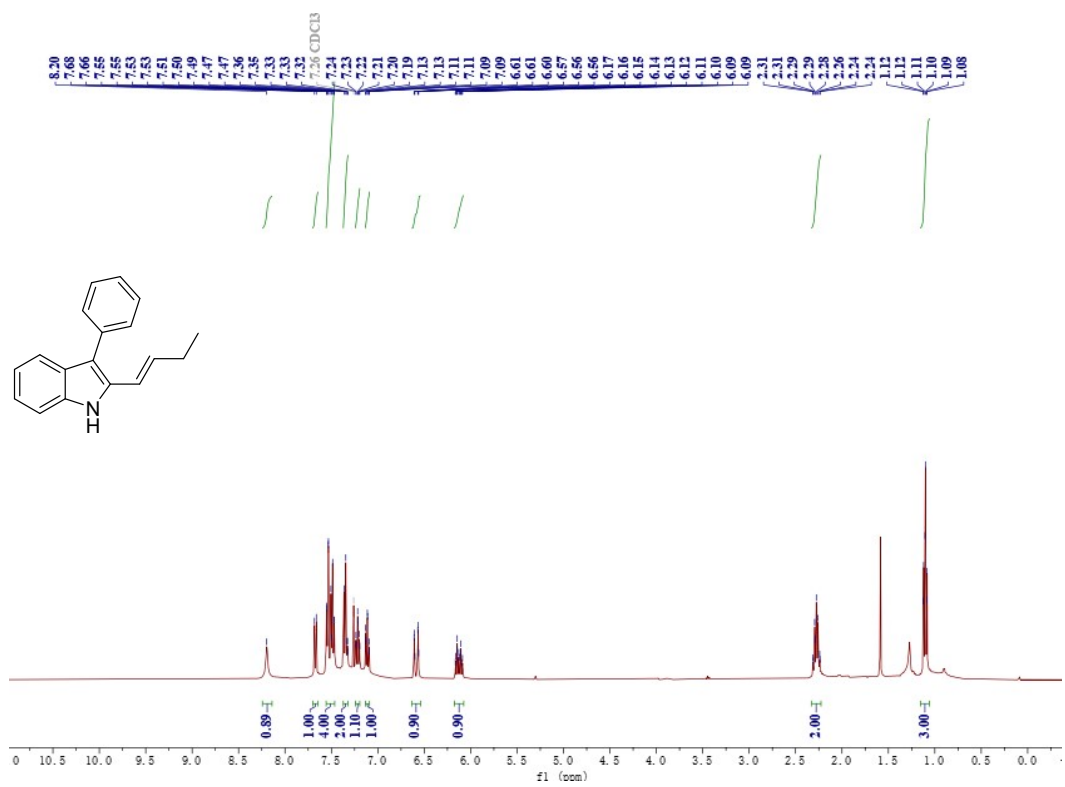

**<sup>13</sup>C NMR of 31 (101 MHz, CDCl<sub>3</sub>)**

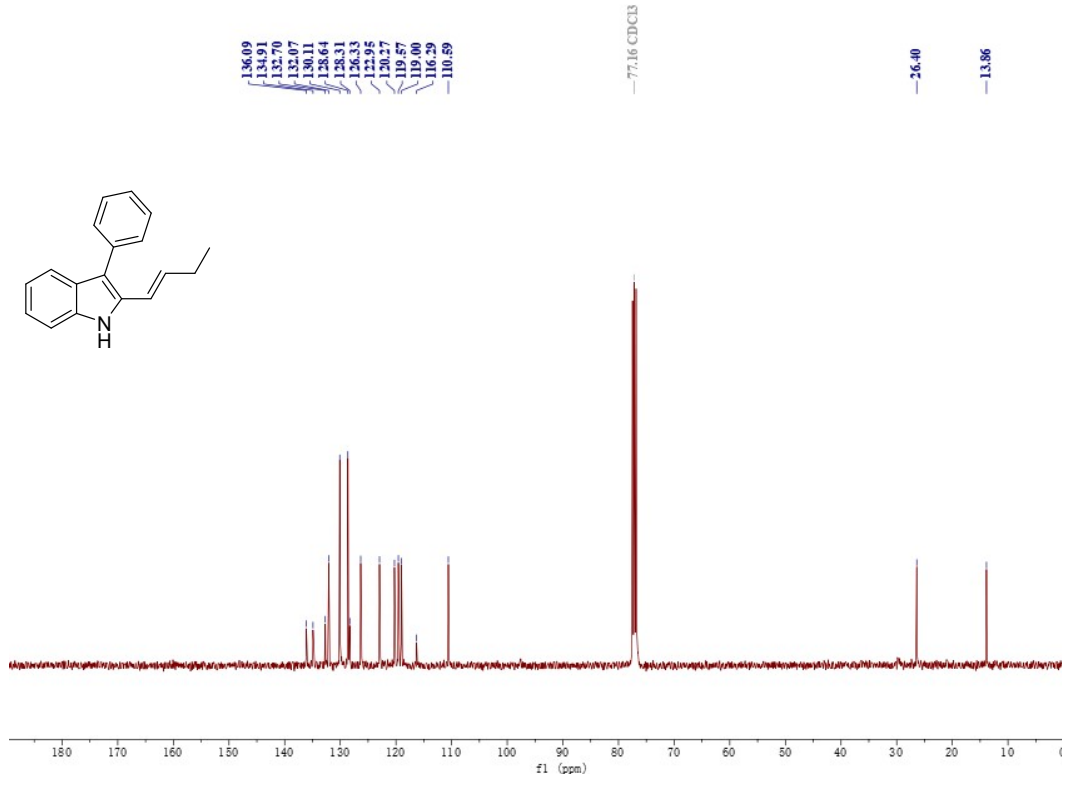

**<sup>1</sup>H NMR of 32 (400 MHz, CDCl<sub>3</sub>)**

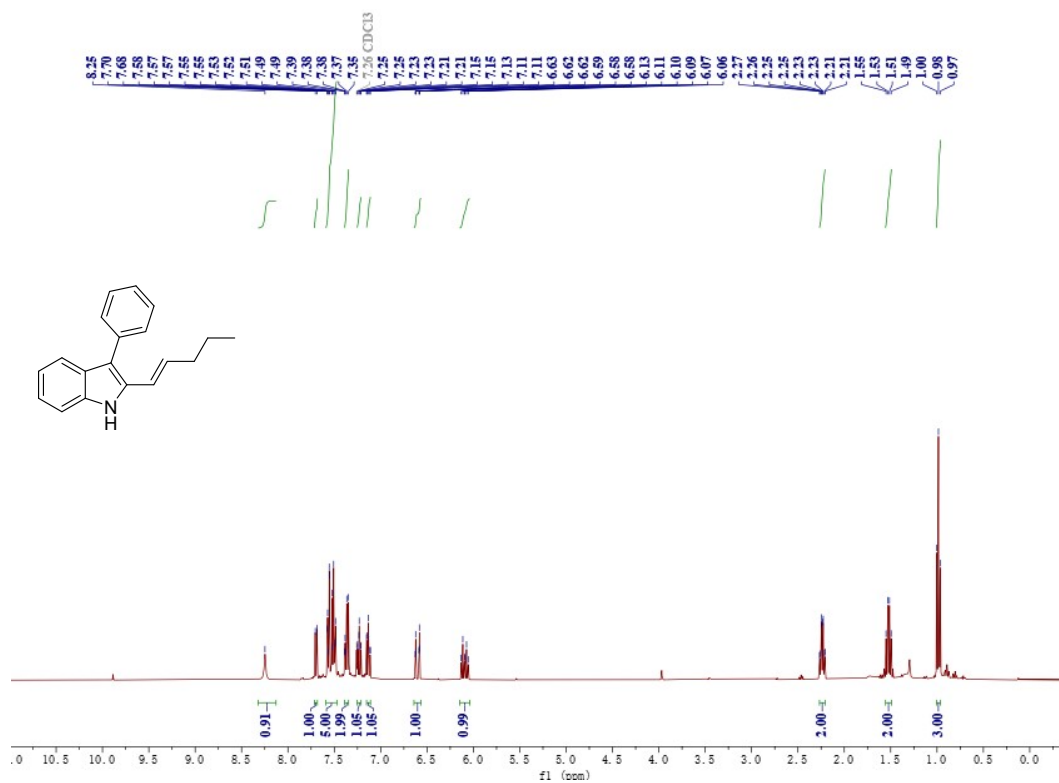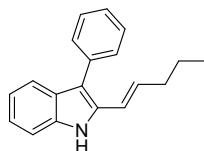

**<sup>13</sup>C NMR of 32 (101 MHz, CDCl<sub>3</sub>)**

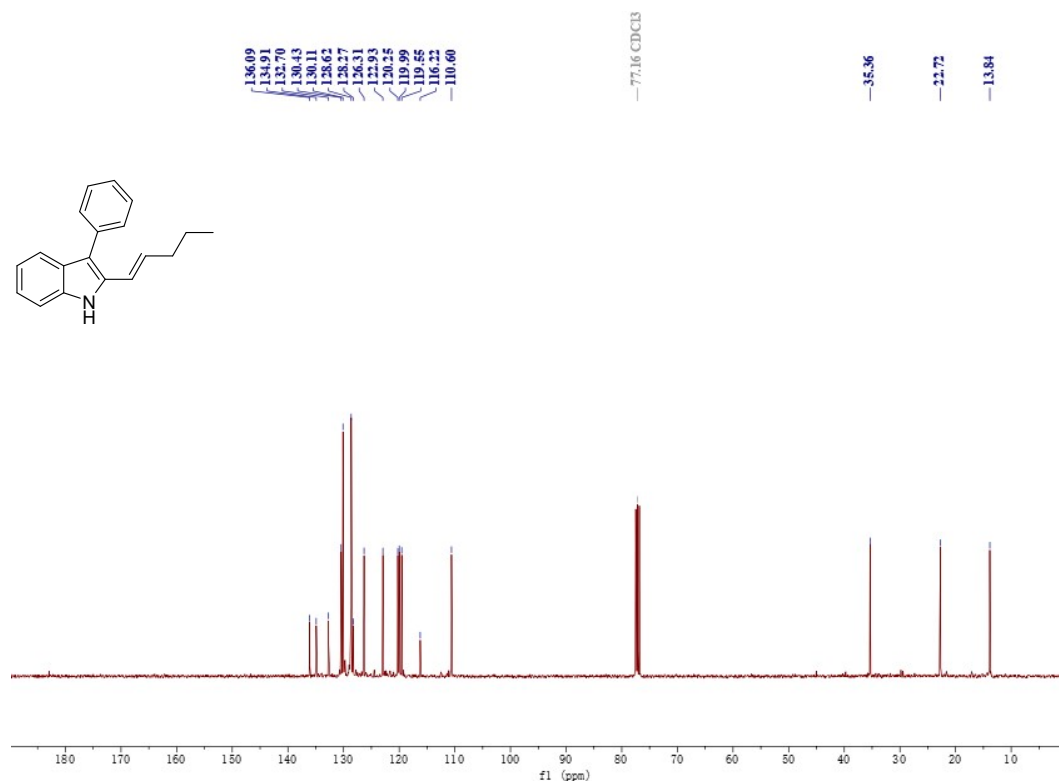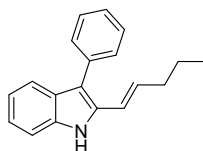

**<sup>1</sup>H NMR of 33 (400 MHz, CDCl<sub>3</sub>)**



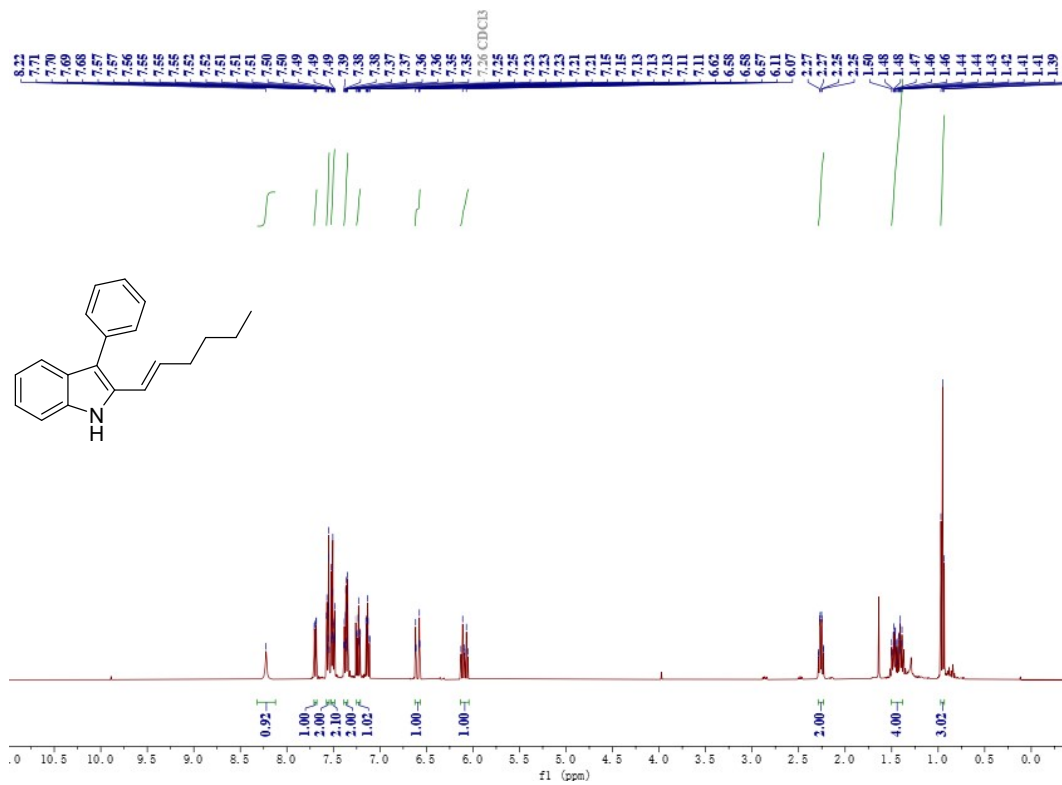

**<sup>13</sup>C NMR of 33 (101 MHz, CDCl<sub>3</sub>)**

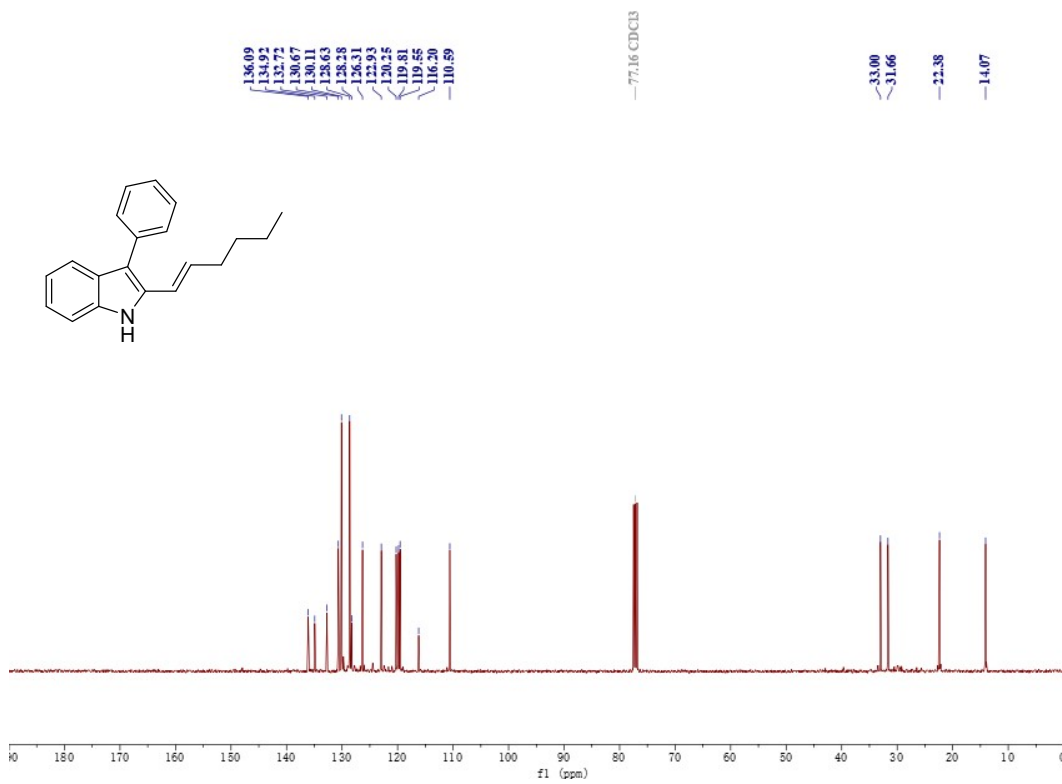

**<sup>1</sup>H NMR of 34 (400 MHz, CDCl<sub>3</sub>)**

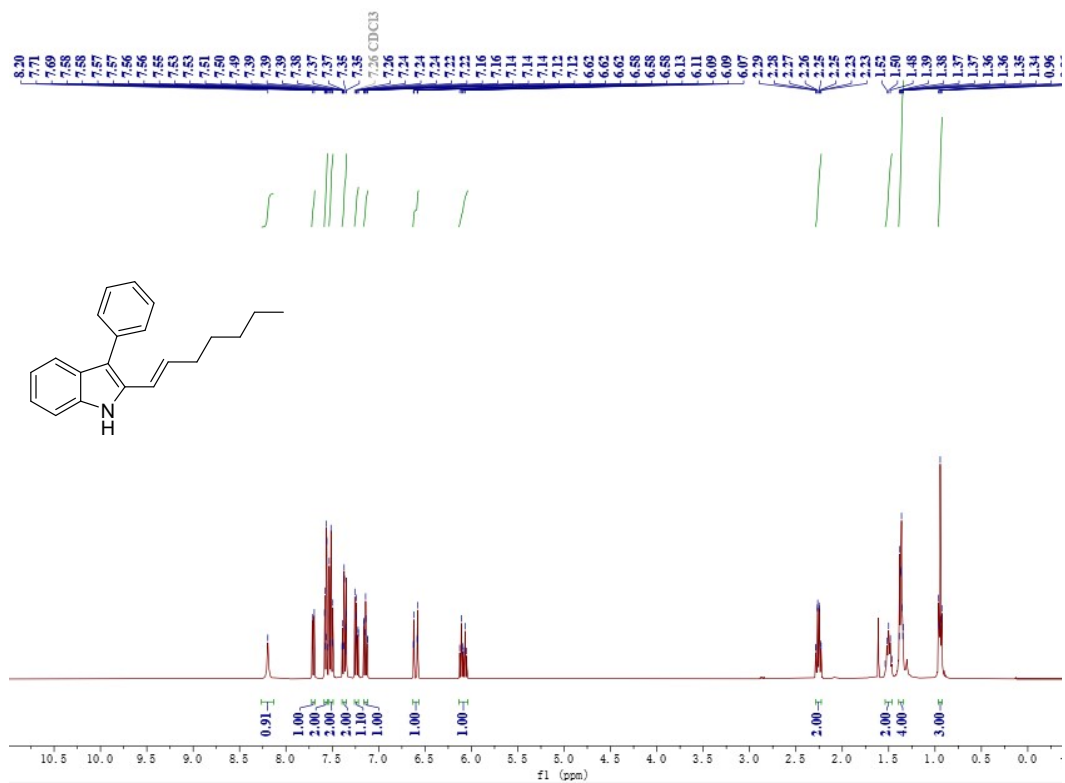

<sup>13</sup>C NMR of **34** (101 MHz, CDCl<sub>3</sub>)

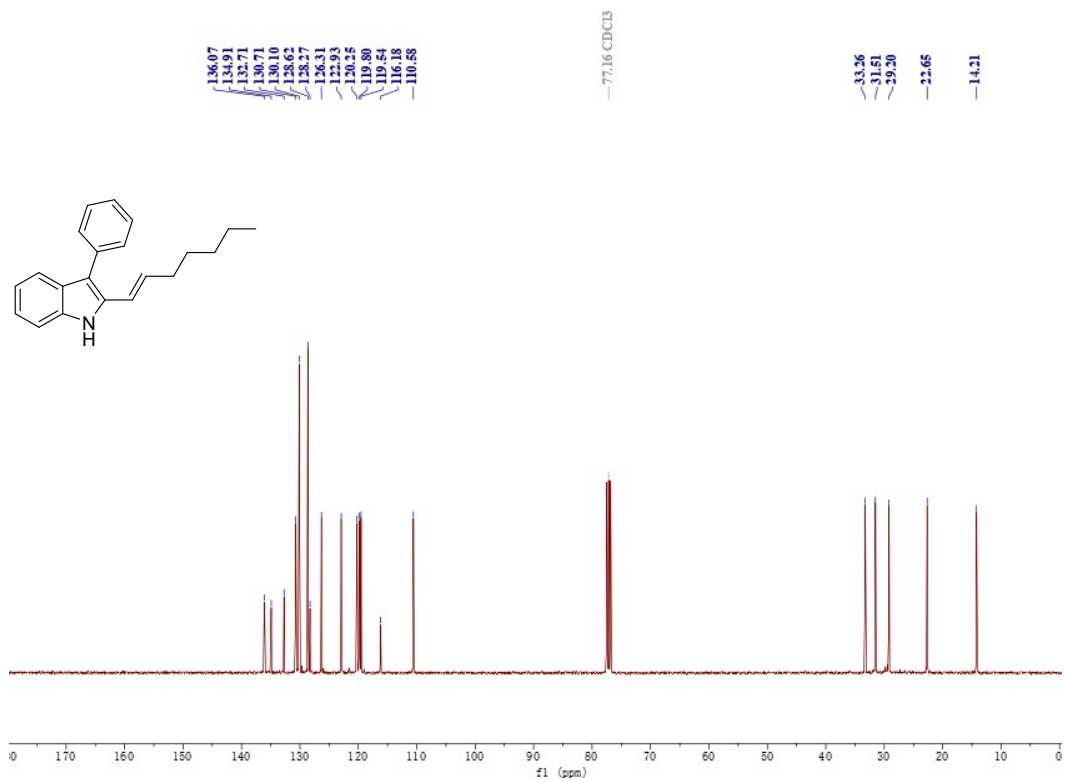

<sup>1</sup>H NMR of **35** (400 MHz, CDCl<sub>3</sub>)

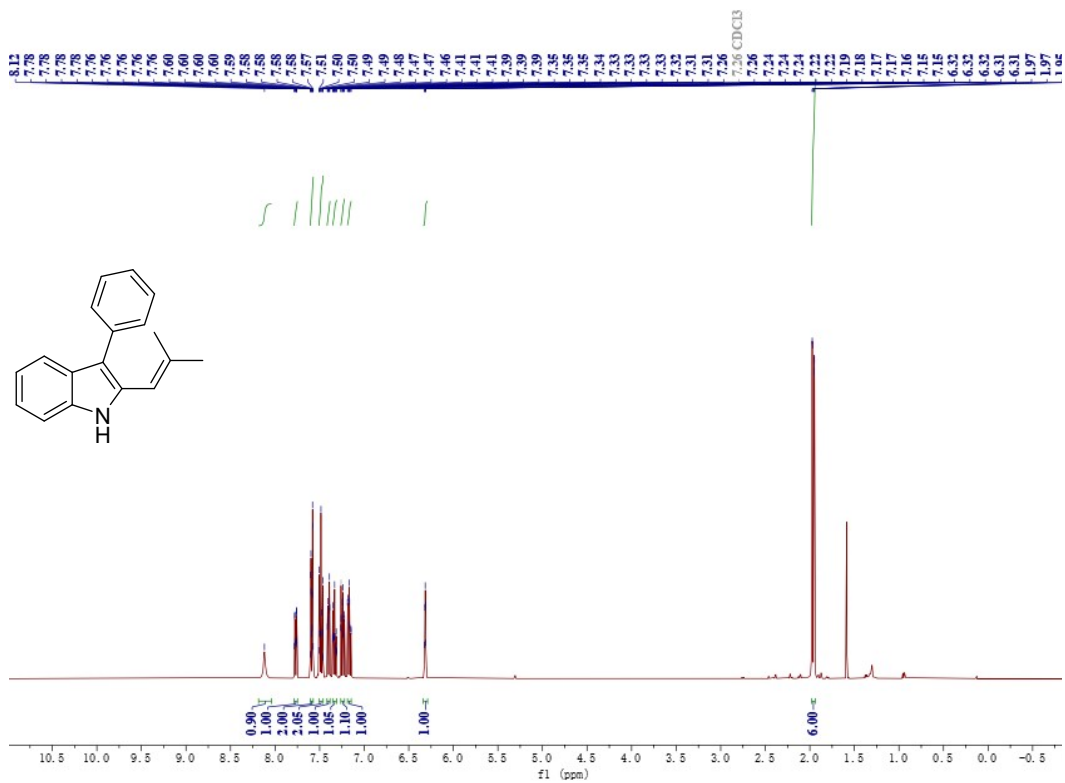

**<sup>13</sup>C NMR of 35 (101 MHz, CDCl<sub>3</sub>)**

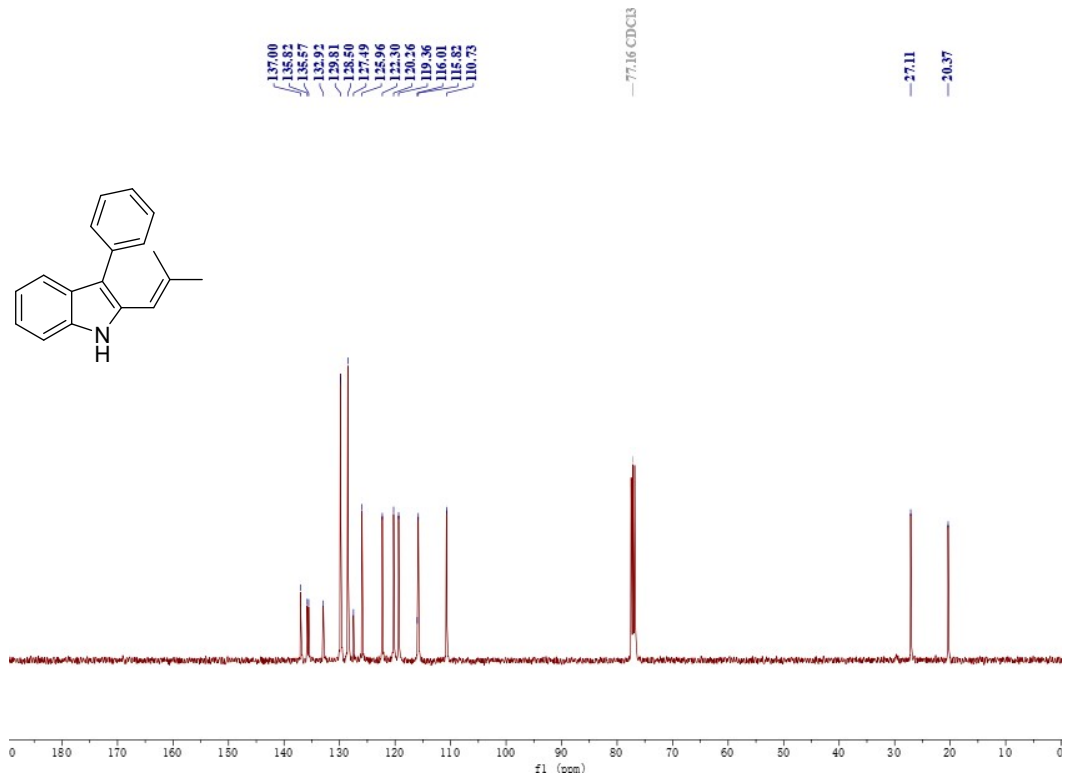

**<sup>1</sup>H NMR of 36 (400 MHz, CDCl<sub>3</sub>)**

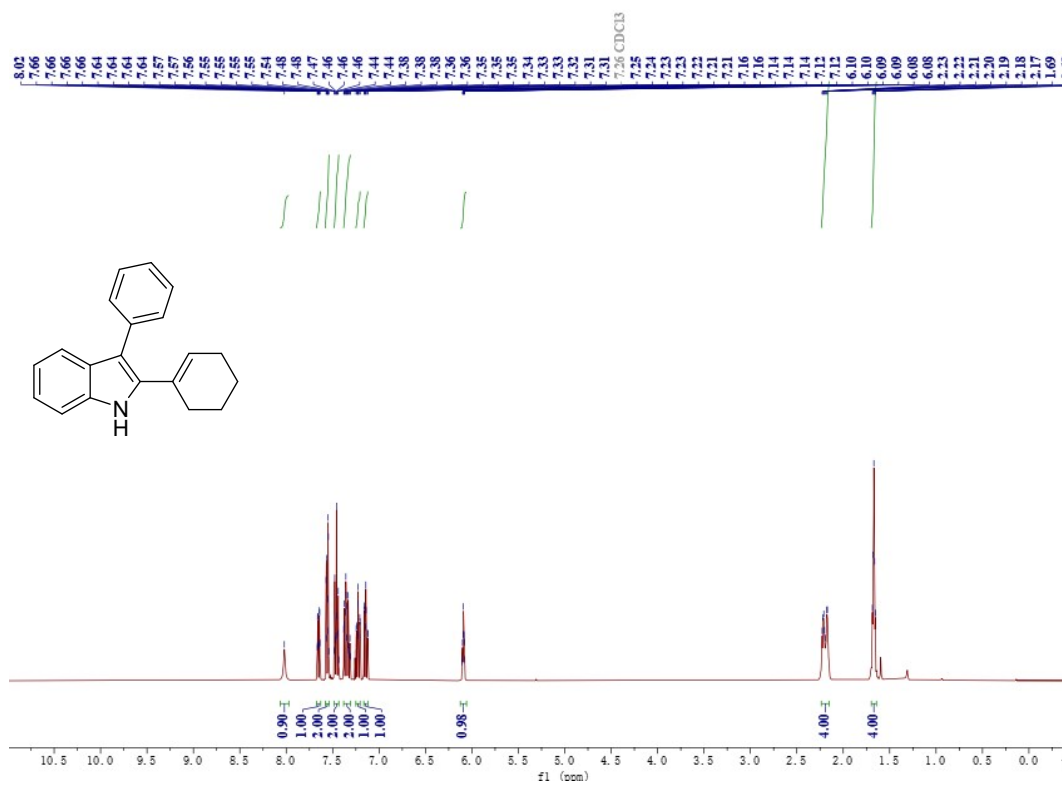

<sup>13</sup>C NMR of **36** (101 MHz, CDCl<sub>3</sub>)

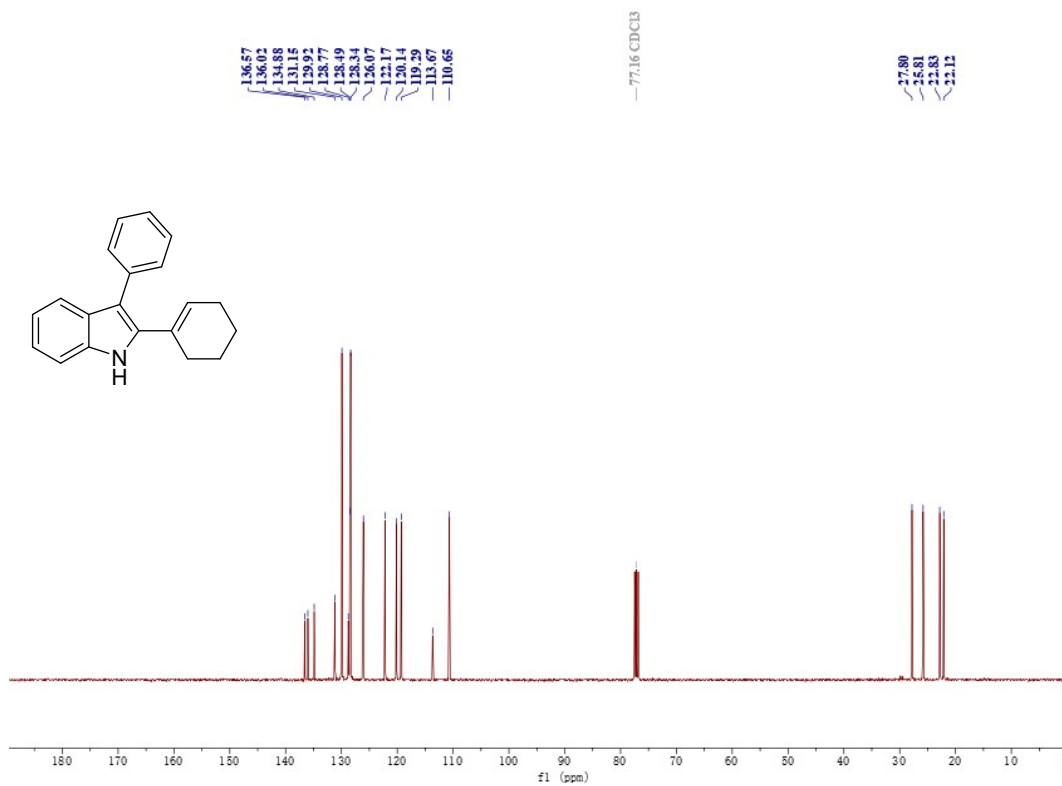

<sup>1</sup>H NMR of **37** (400 MHz, CDCl<sub>3</sub>)

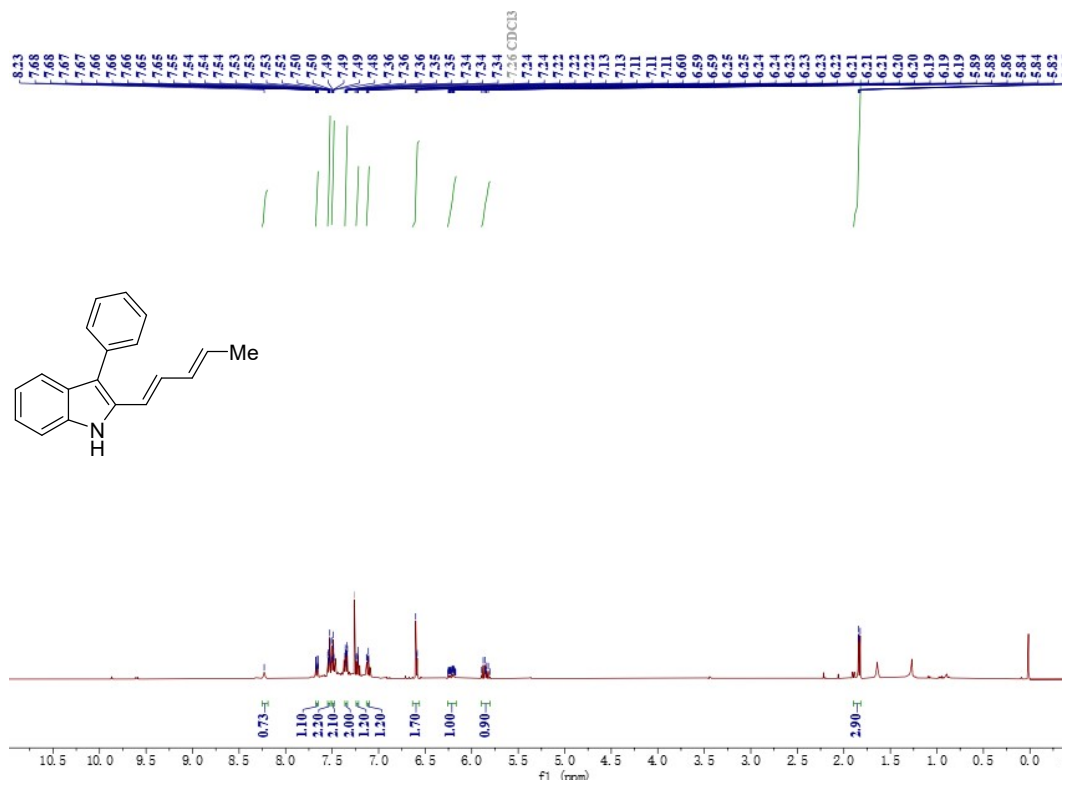

**<sup>13</sup>C NMR of 37 (101 MHz, CDCl<sub>3</sub>)**

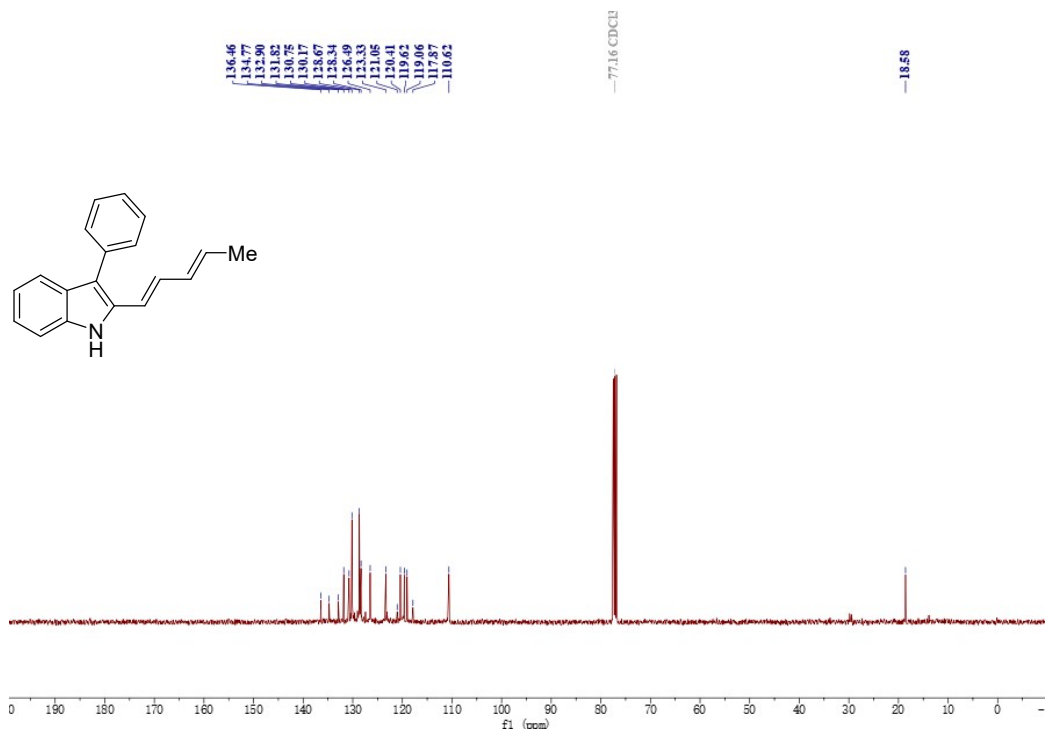

**<sup>1</sup>H NMR of 38 (400 MHz, CDCl<sub>3</sub>)**

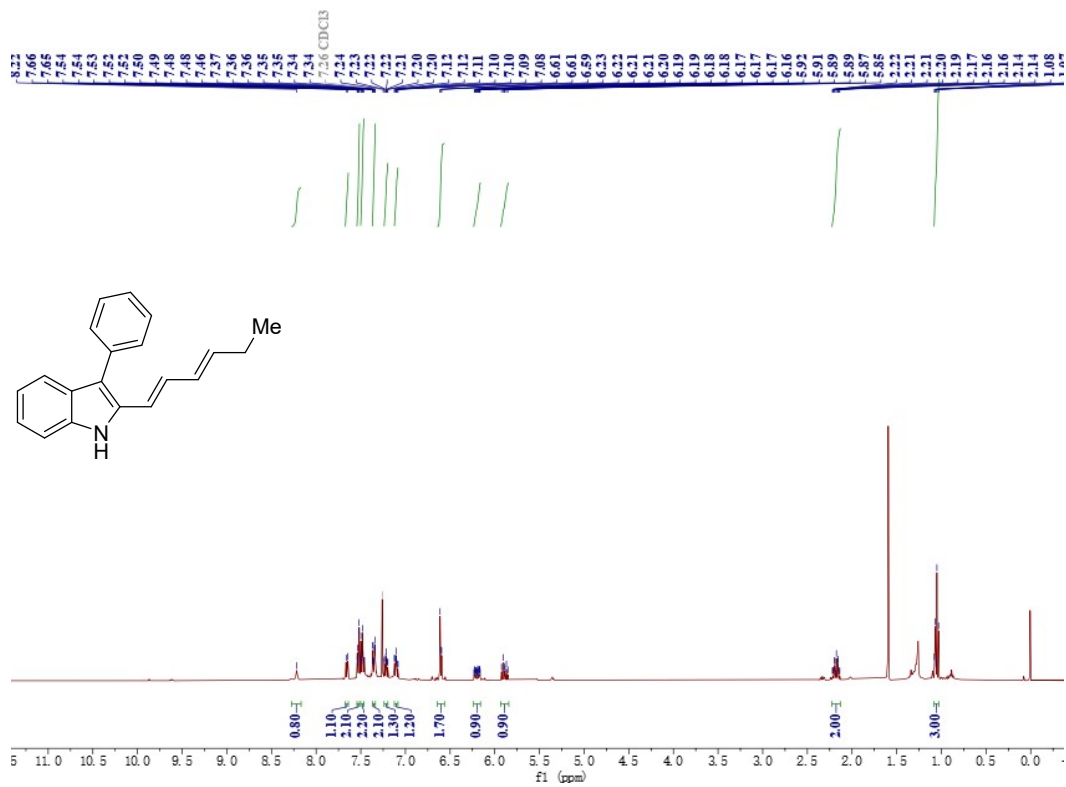

<sup>13</sup>C NMR of **38** (101 MHz, CDCl<sub>3</sub>)

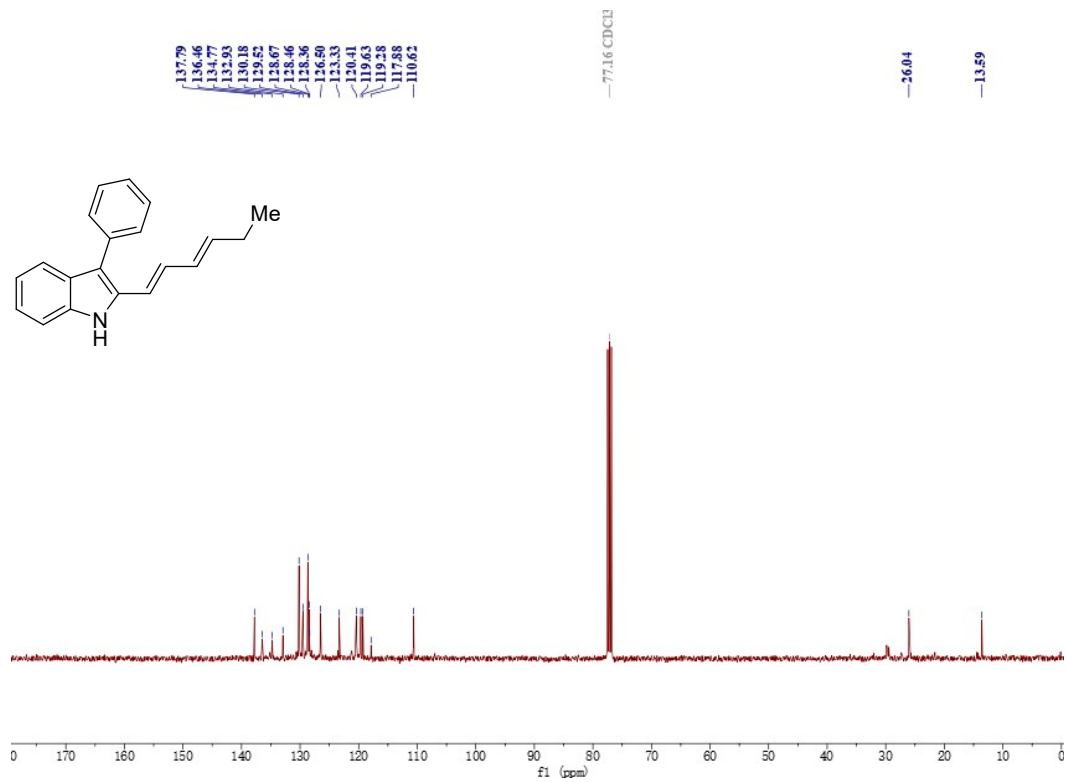

<sup>1</sup>H NMR of **39** (300 MHz, CDCl<sub>3</sub>)

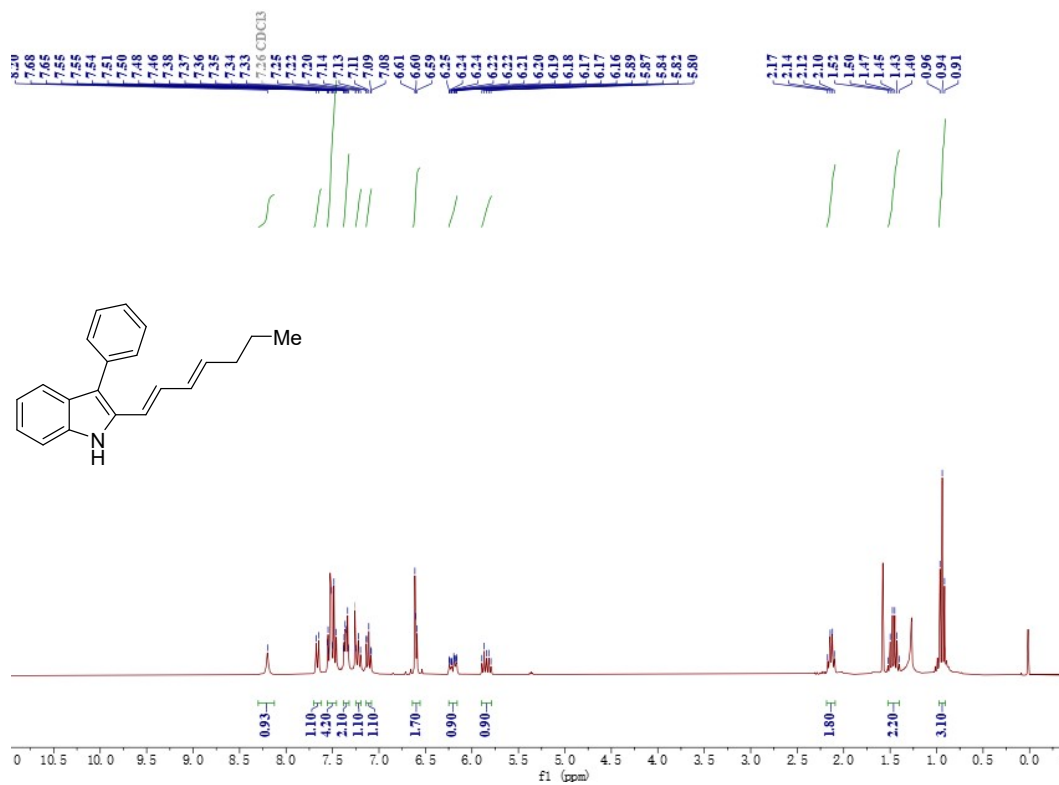

**<sup>13</sup>C NMR of 39 (76 MHz, CDCl<sub>3</sub>)**

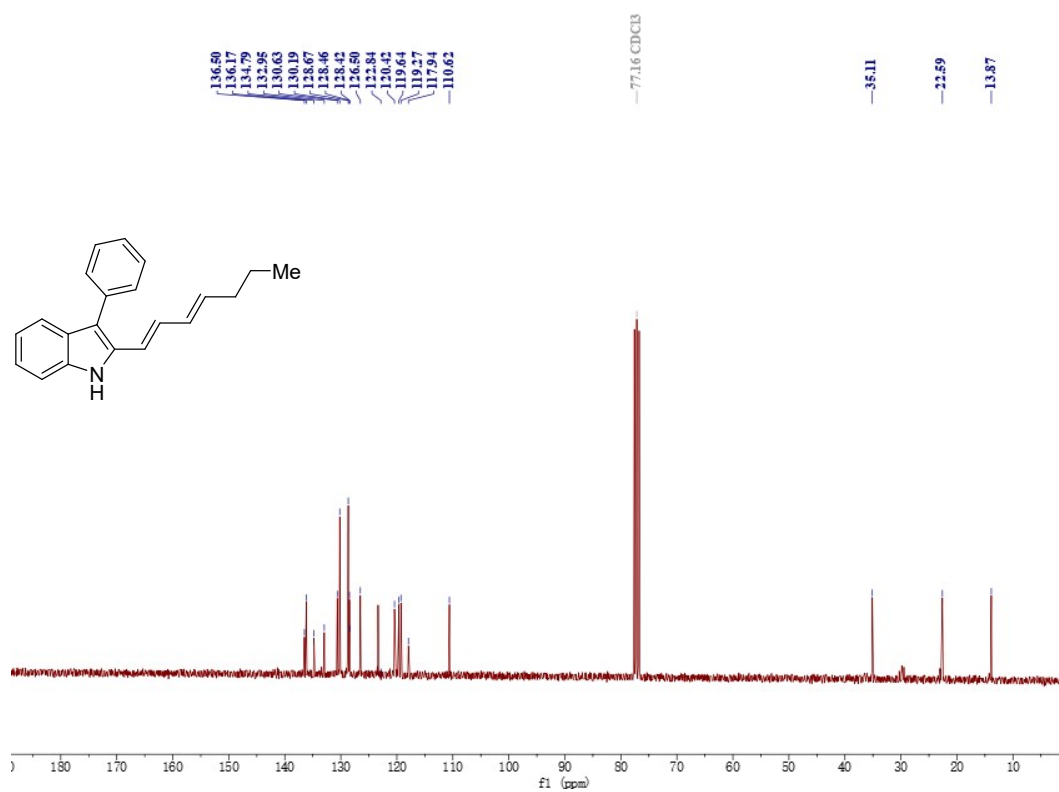

**<sup>1</sup>H NMR of 41 (400 MHz, CDCl<sub>3</sub>)**

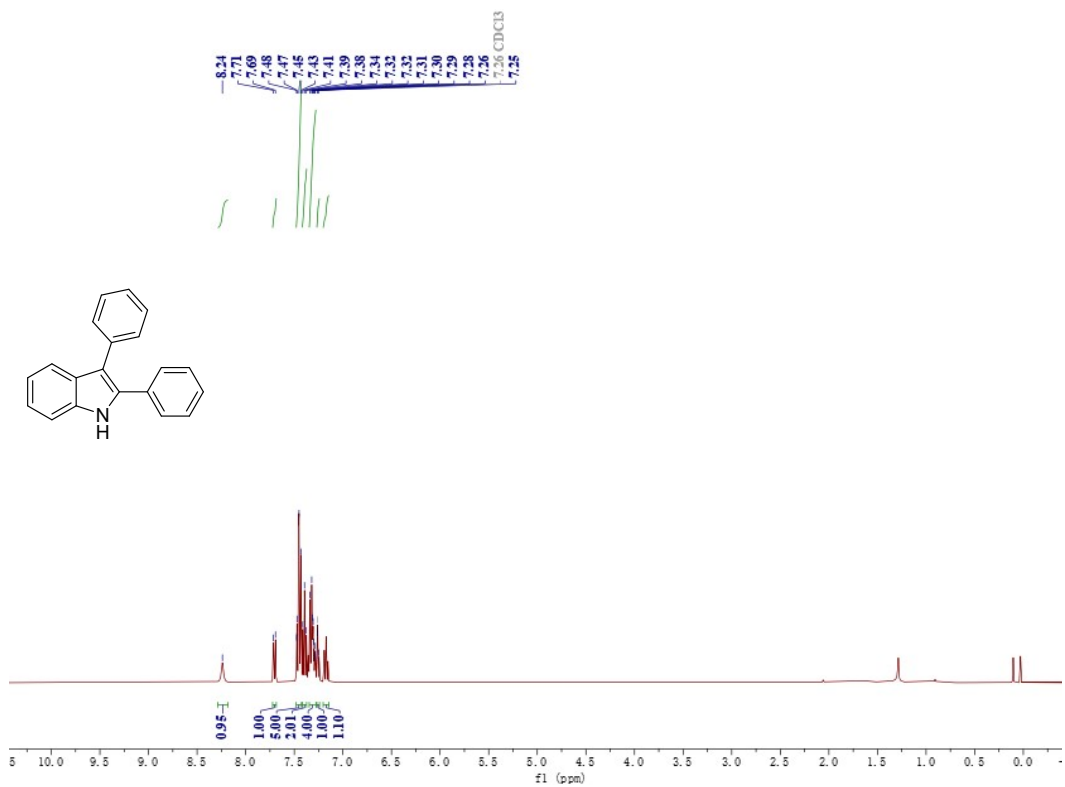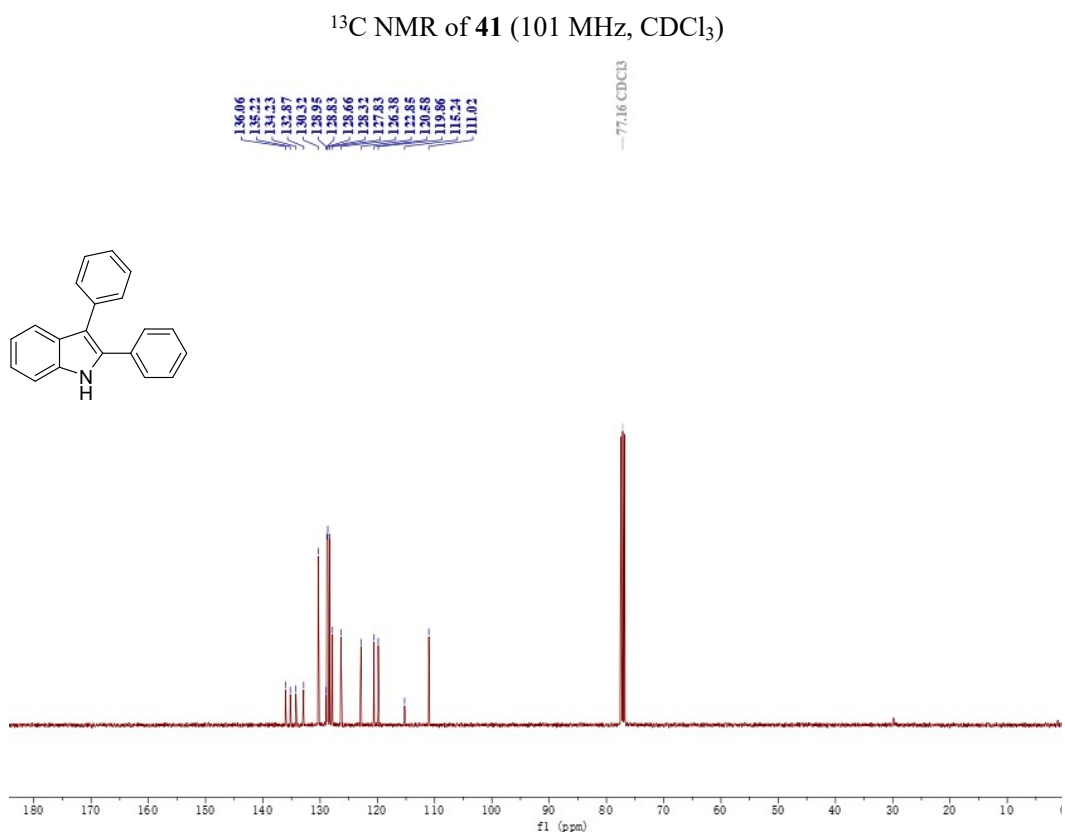

**<sup>1</sup>H NMR of 42 (400 MHz, CDCl<sub>3</sub>)**



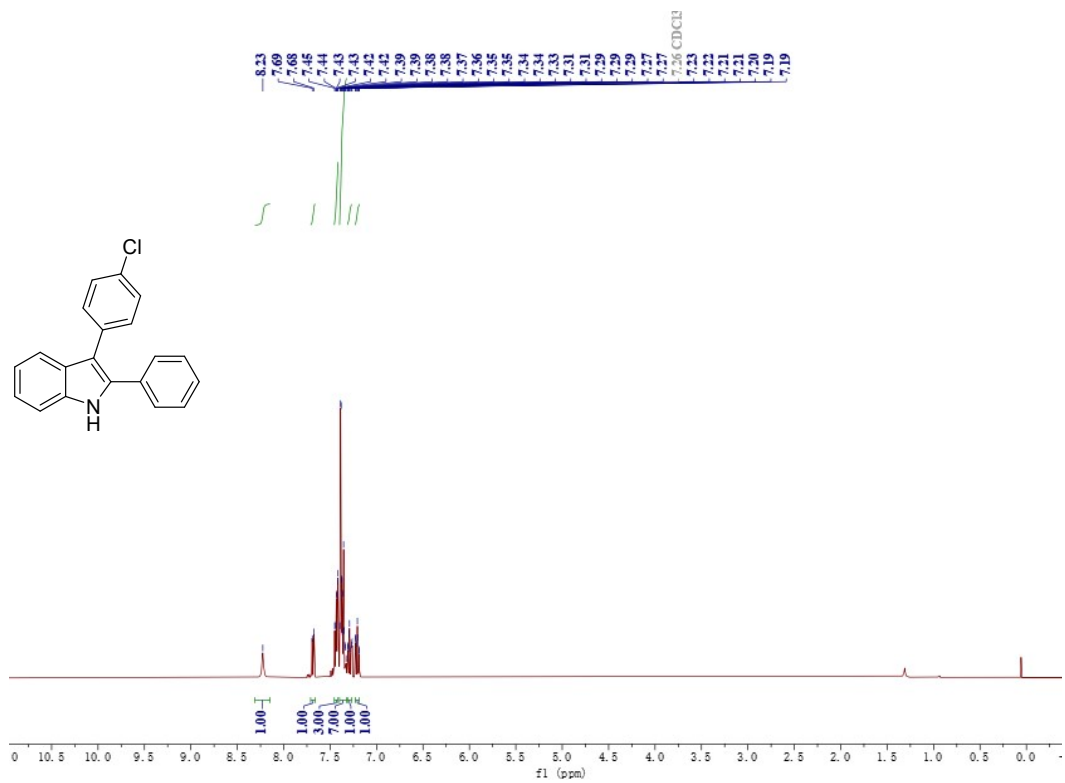

<sup>13</sup>C NMR of **42** (101 MHz, CDCl<sub>3</sub>)

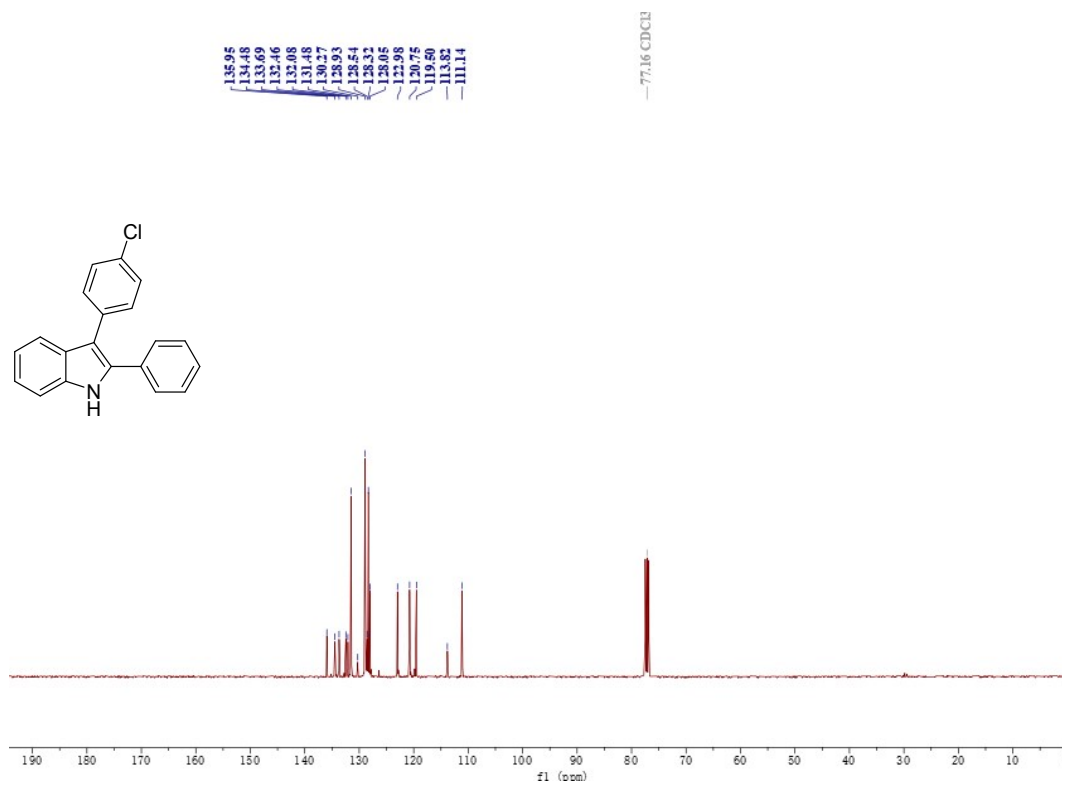

<sup>1</sup>H NMR of **43** (400 MHz, CDCl<sub>3</sub>)

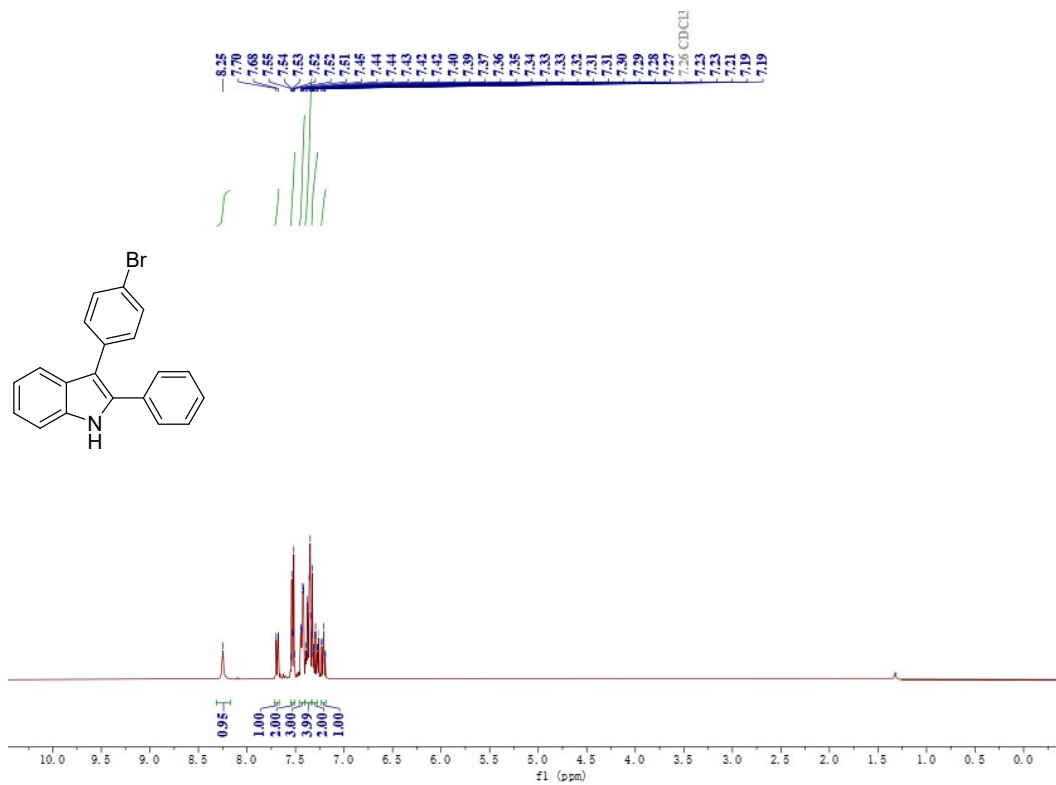

<sup>13</sup>C NMR of **43** (101 MHz, CDCl<sub>3</sub>)

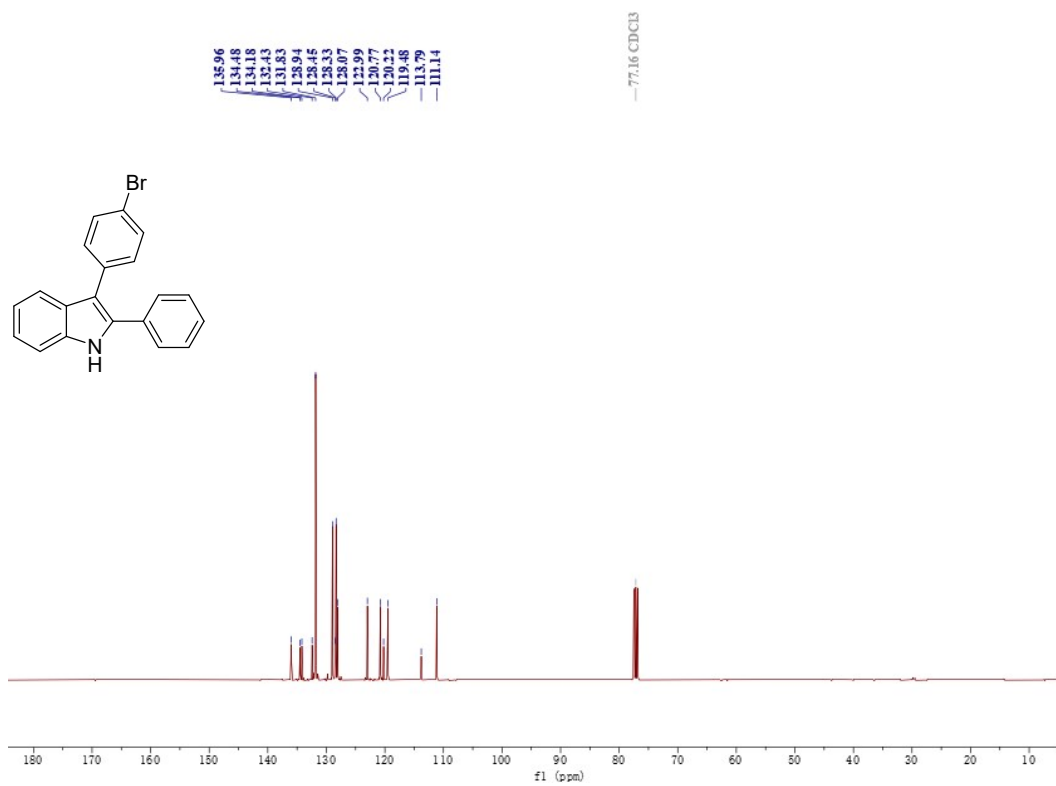

<sup>1</sup>H NMR of **44** (400 MHz, CDCl<sub>3</sub>)

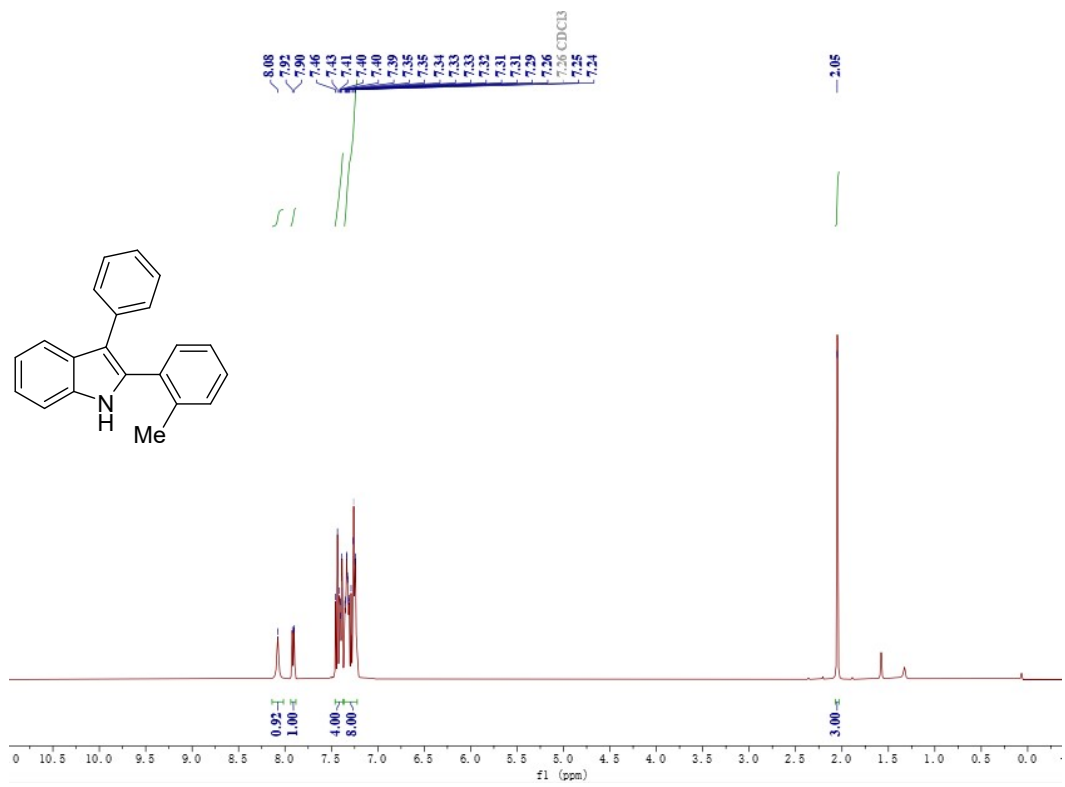

**<sup>13</sup>C NMR of 44 (101 MHz, CDCl<sub>3</sub>)**

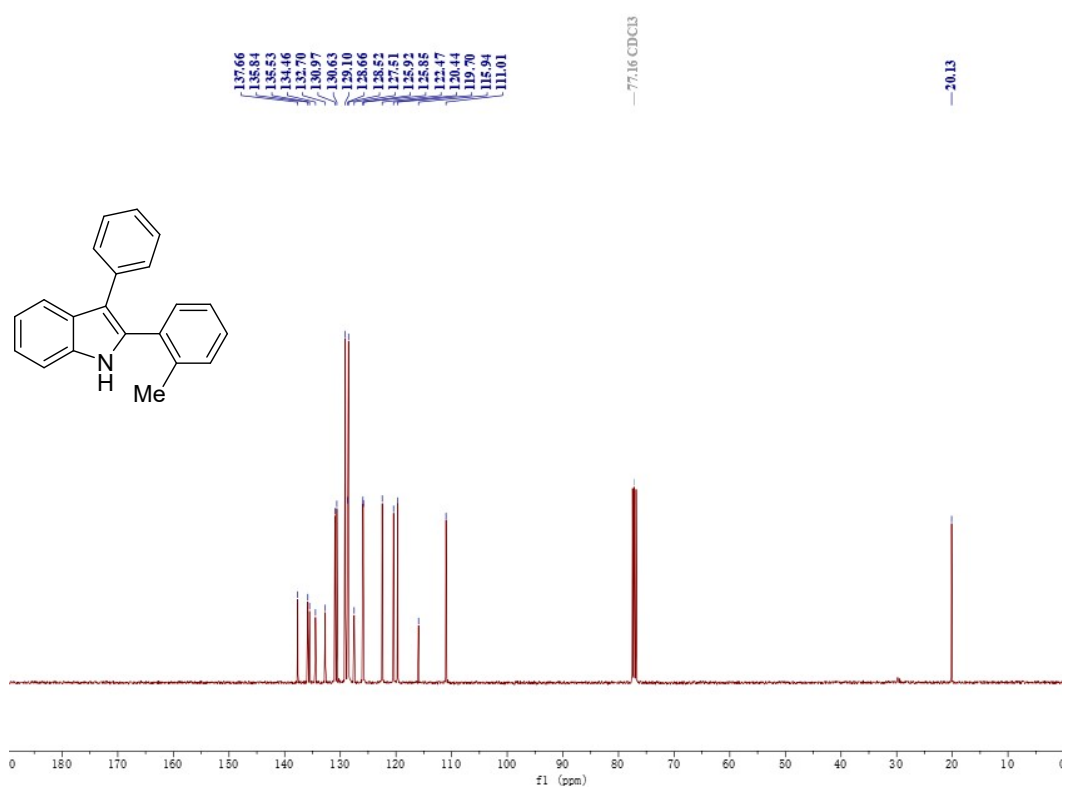

**<sup>1</sup>H NMR of 45 (400 MHz, CDCl<sub>3</sub>)**

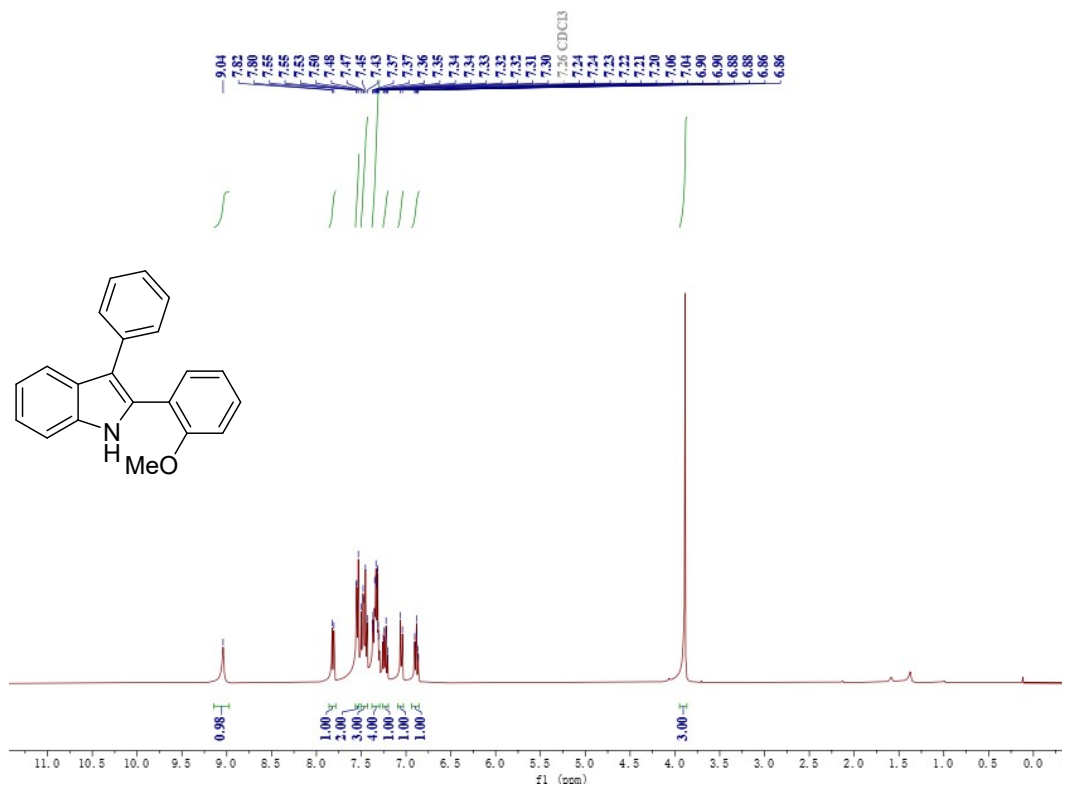

**<sup>13</sup>C NMR of 45 (101 MHz, CDCl<sub>3</sub>)**

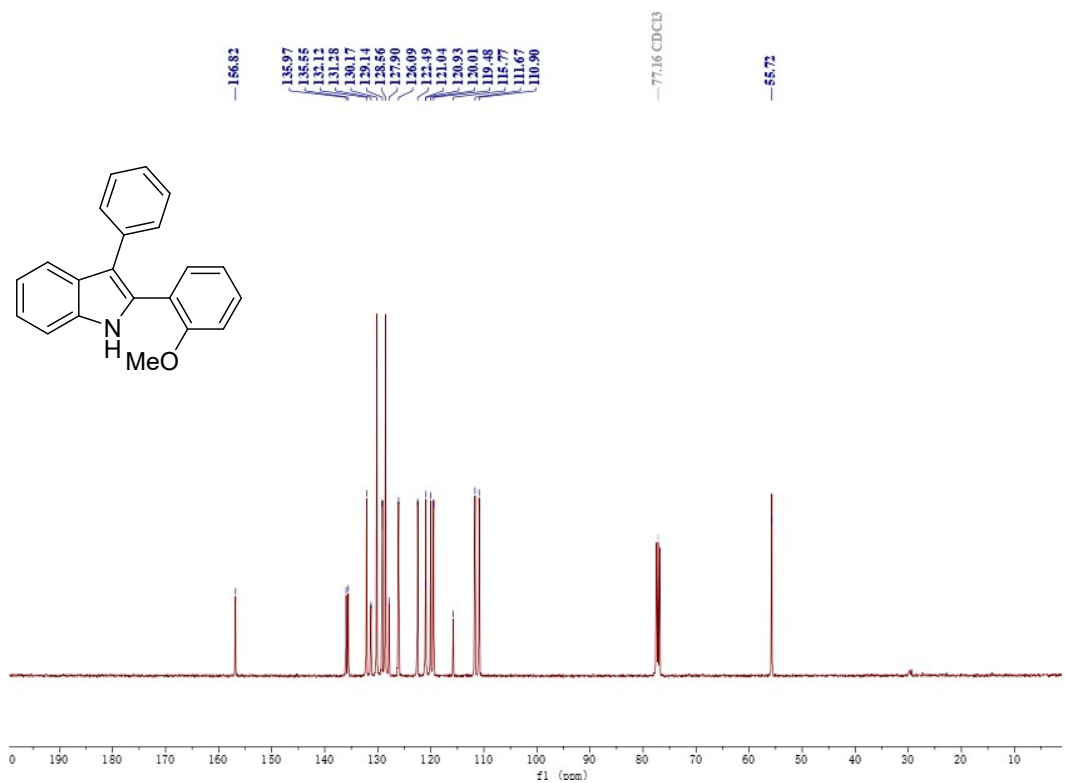

**<sup>1</sup>H NMR of 46 (400 MHz, CDCl<sub>3</sub>)**

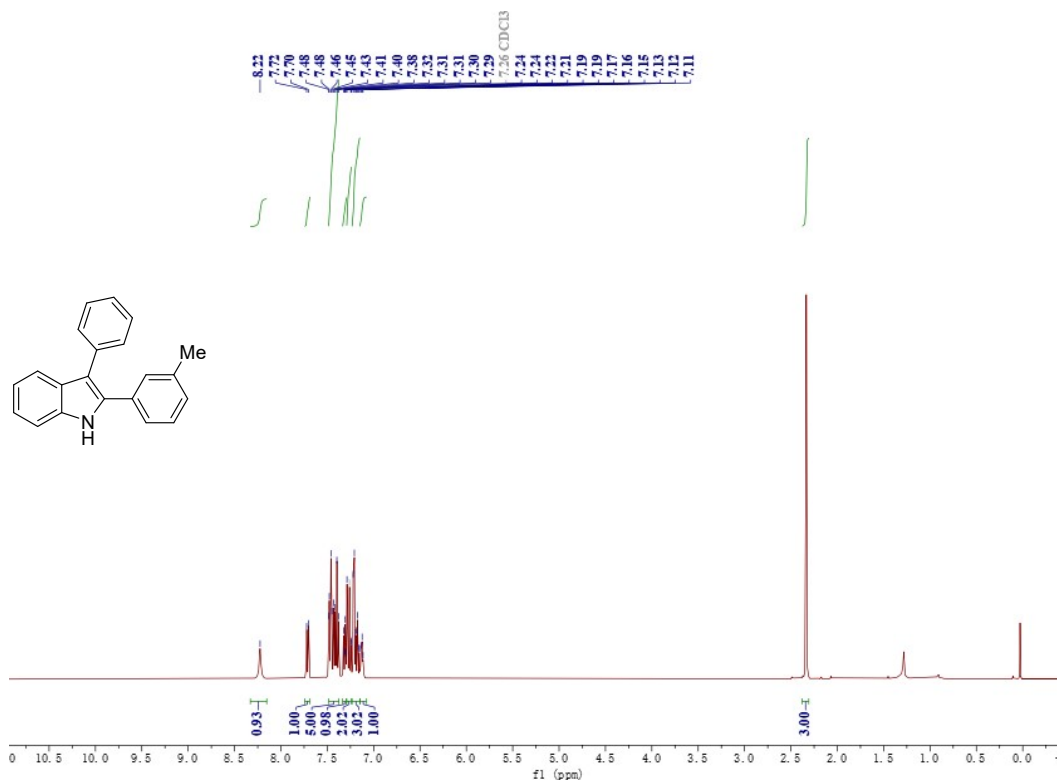

<sup>13</sup>C NMR of **46** (101 MHz, CDCl<sub>3</sub>)

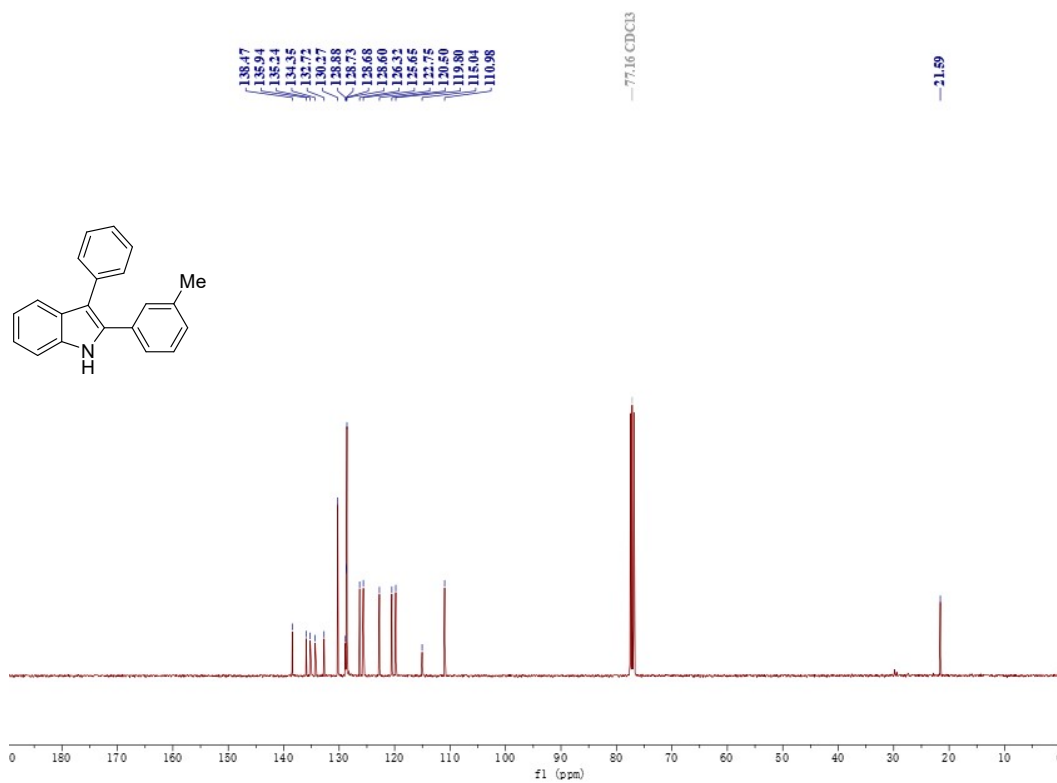

<sup>1</sup>H NMR of **47** (400 MHz, CDCl<sub>3</sub>)

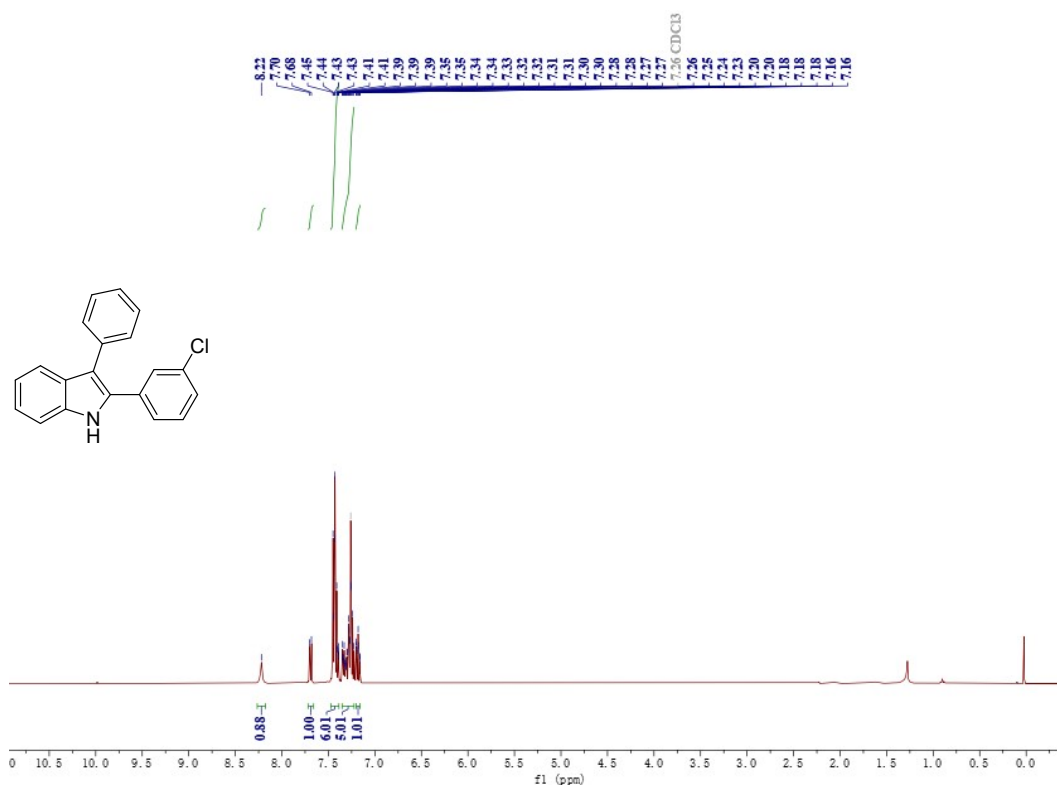

<sup>13</sup>C NMR of **47** (101 MHz, CDCl<sub>3</sub>)

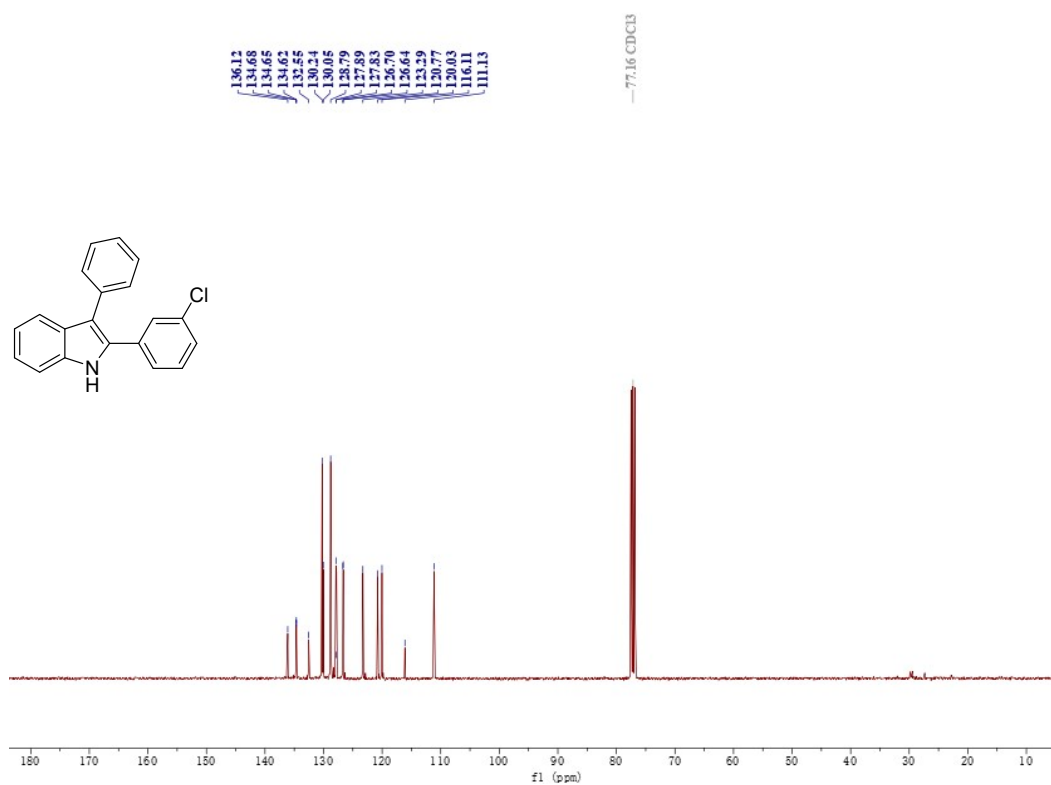

<sup>1</sup>H NMR of **48** (400 MHz, CDCl<sub>3</sub>)

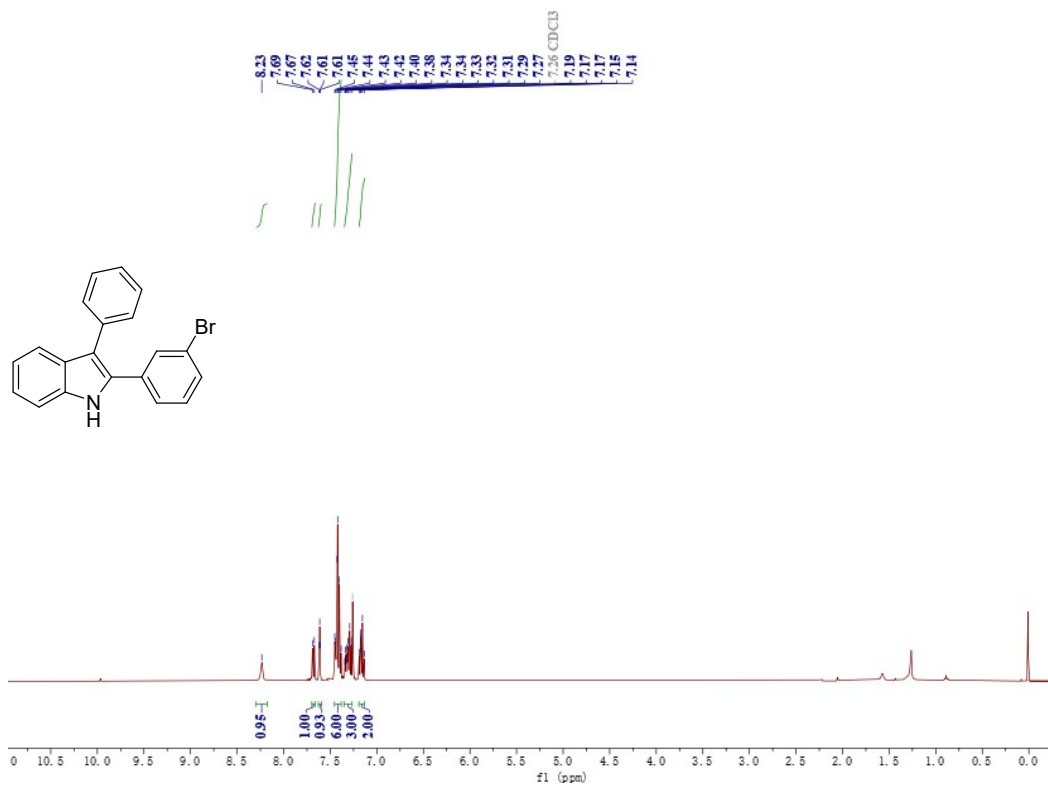

**<sup>13</sup>C NMR of 48 (101 MHz, CDCl<sub>3</sub>)**

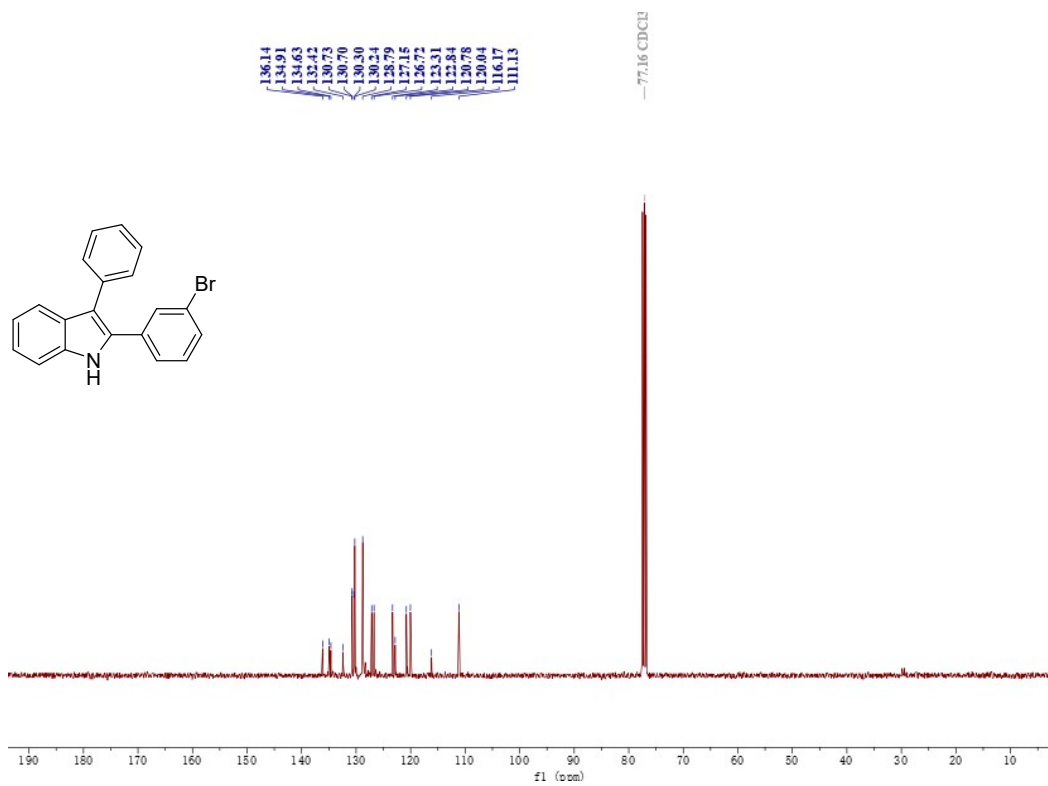

**<sup>1</sup>H NMR of 49 (400 MHz, CDCl<sub>3</sub>)**

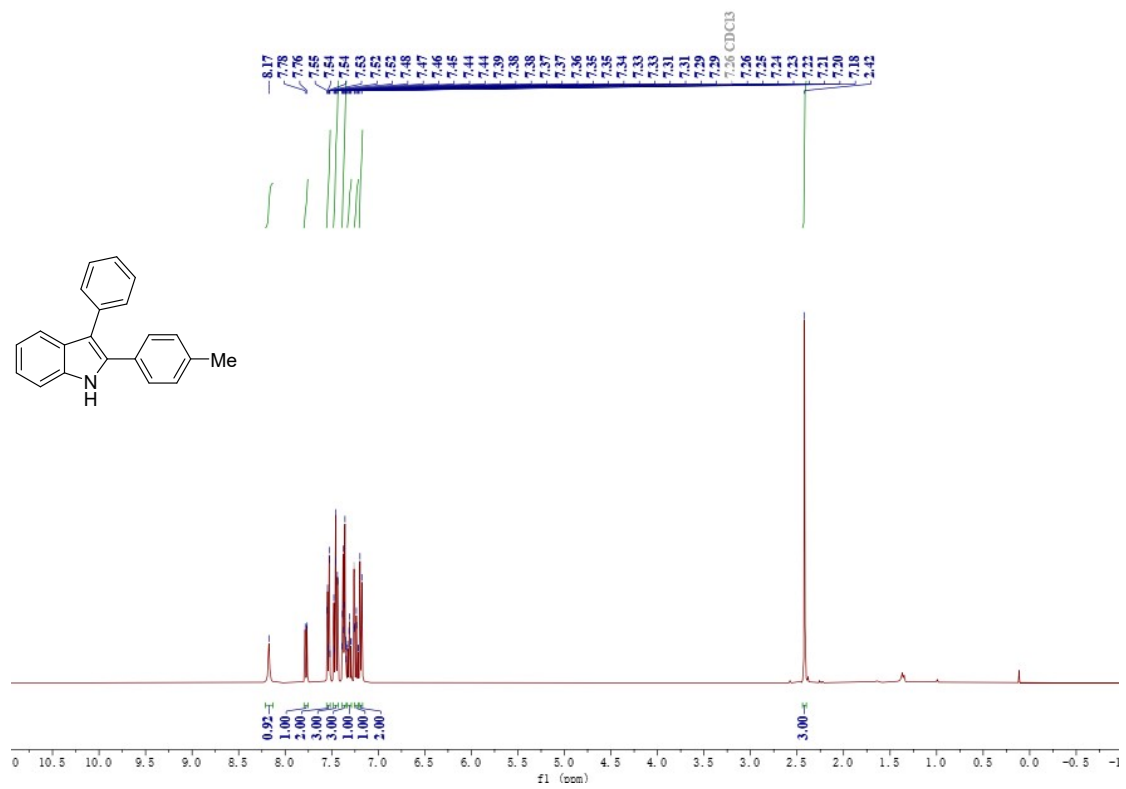

<sup>13</sup>C NMR of **49** (101 MHz, CDCl<sub>3</sub>)

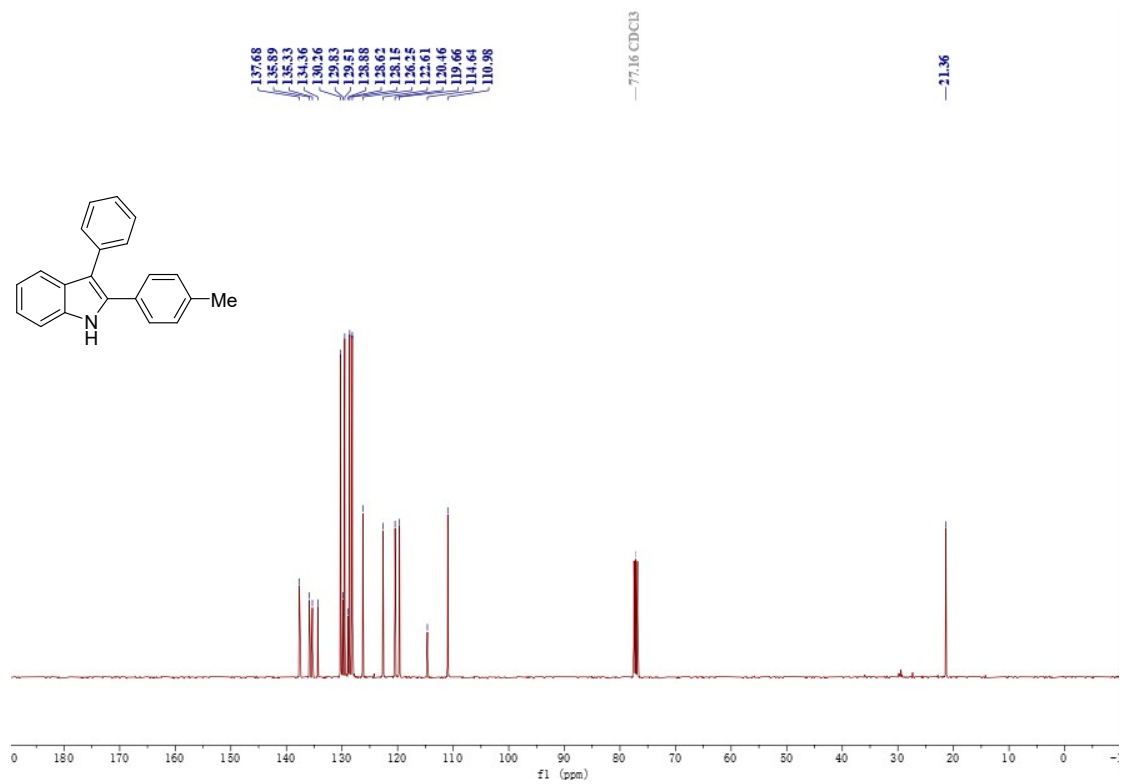

<sup>1</sup>H NMR of **50** (400 MHz, CDCl<sub>3</sub>)



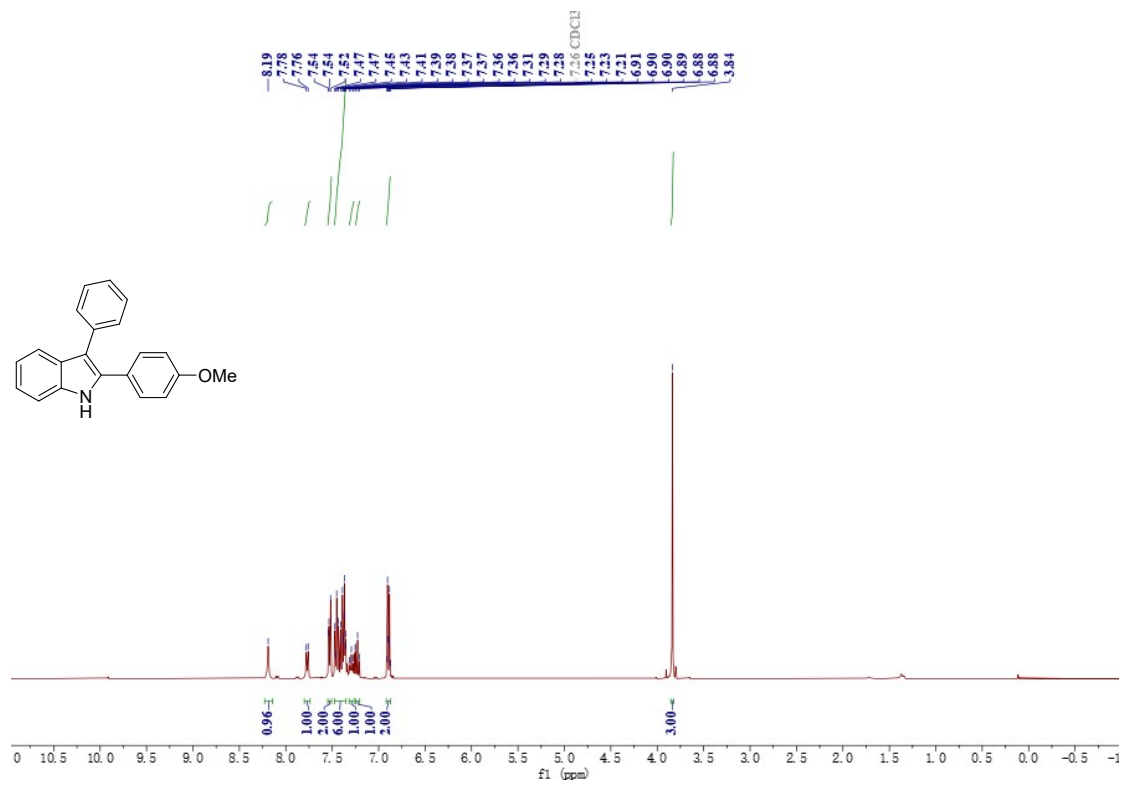

<sup>13</sup>C NMR of **50** (101 MHz, CDCl<sub>3</sub>)

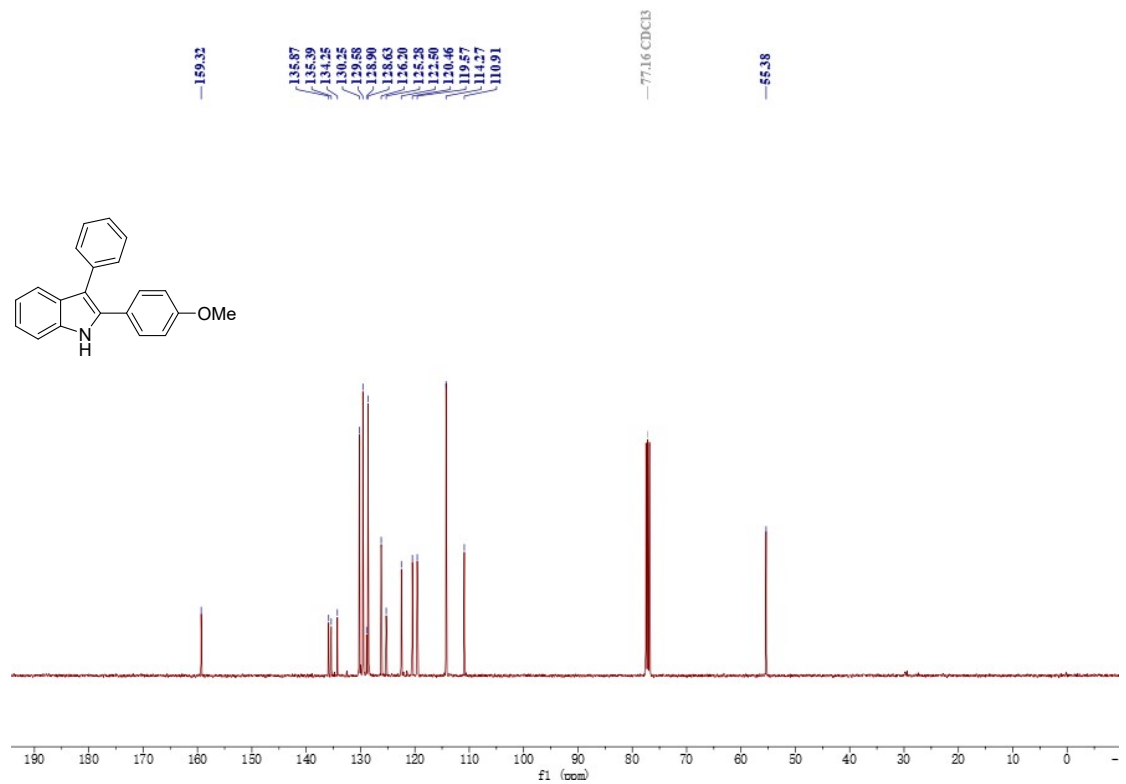

<sup>1</sup>H NMR of **51** (400 MHz, CDCl<sub>3</sub>)

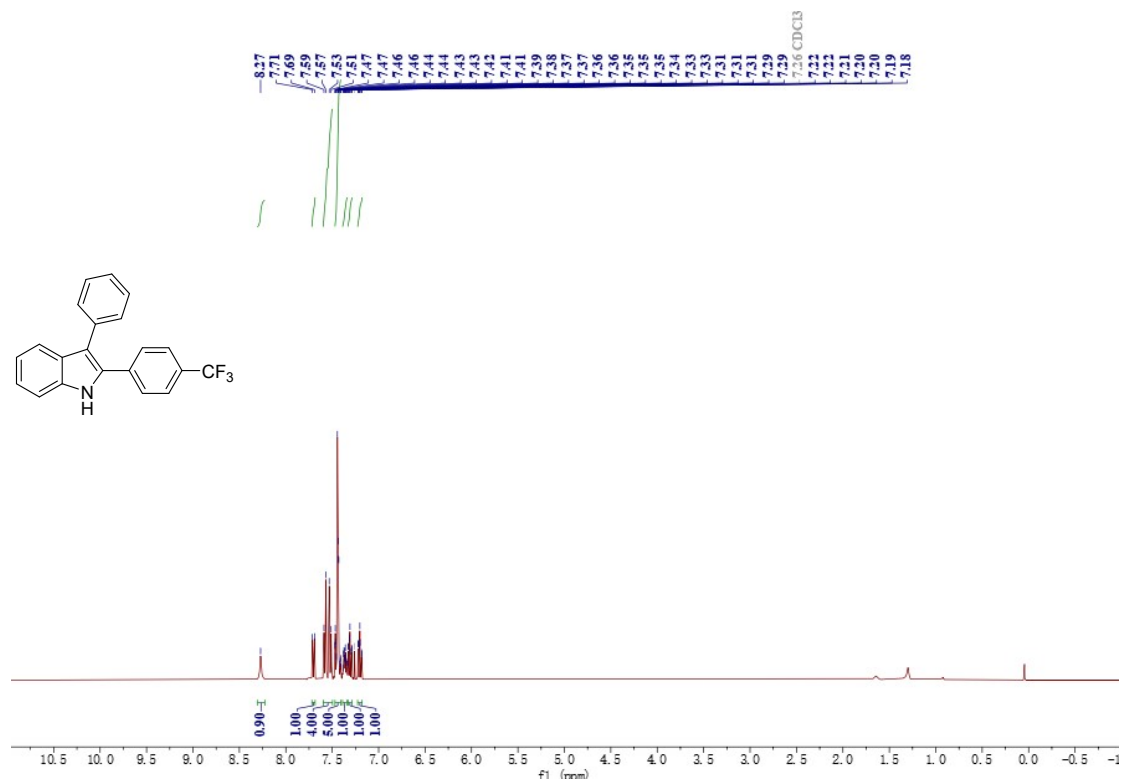

**<sup>13</sup>C NMR of **51** (101 MHz, CDCl<sub>3</sub>)**

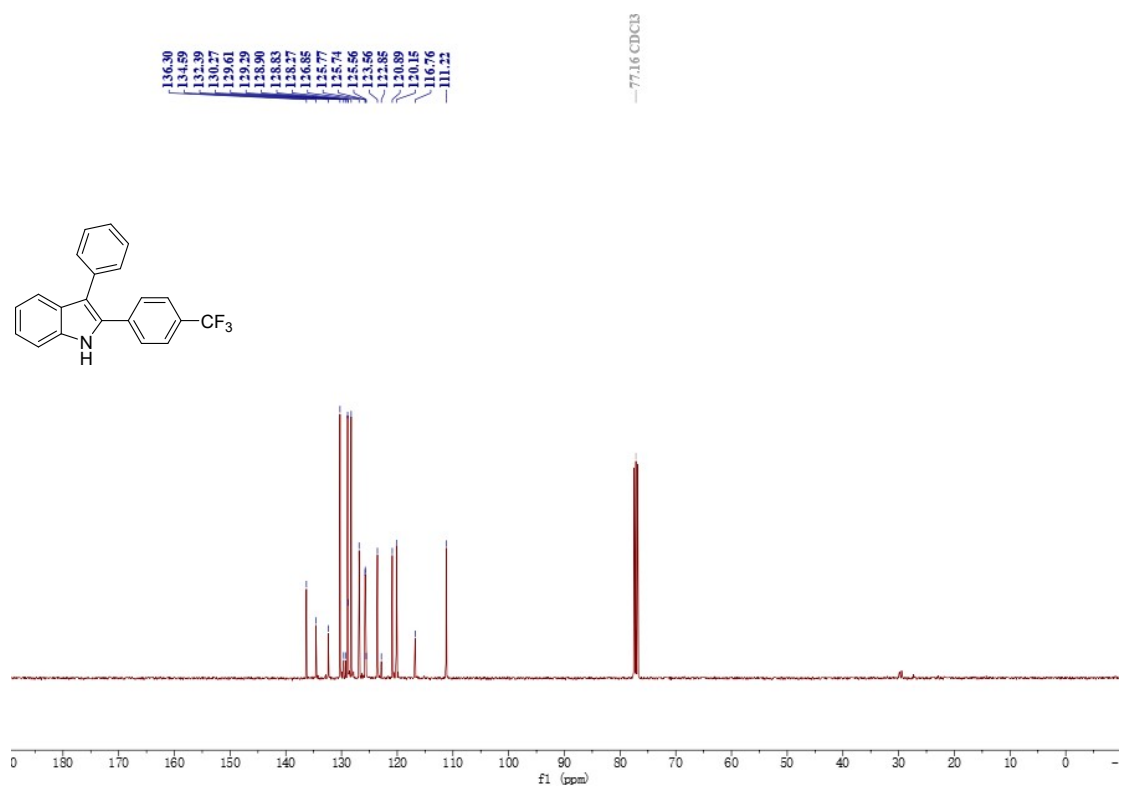

**<sup>19</sup>F NMR of **51** (376 MHz, CDCl<sub>3</sub>)**

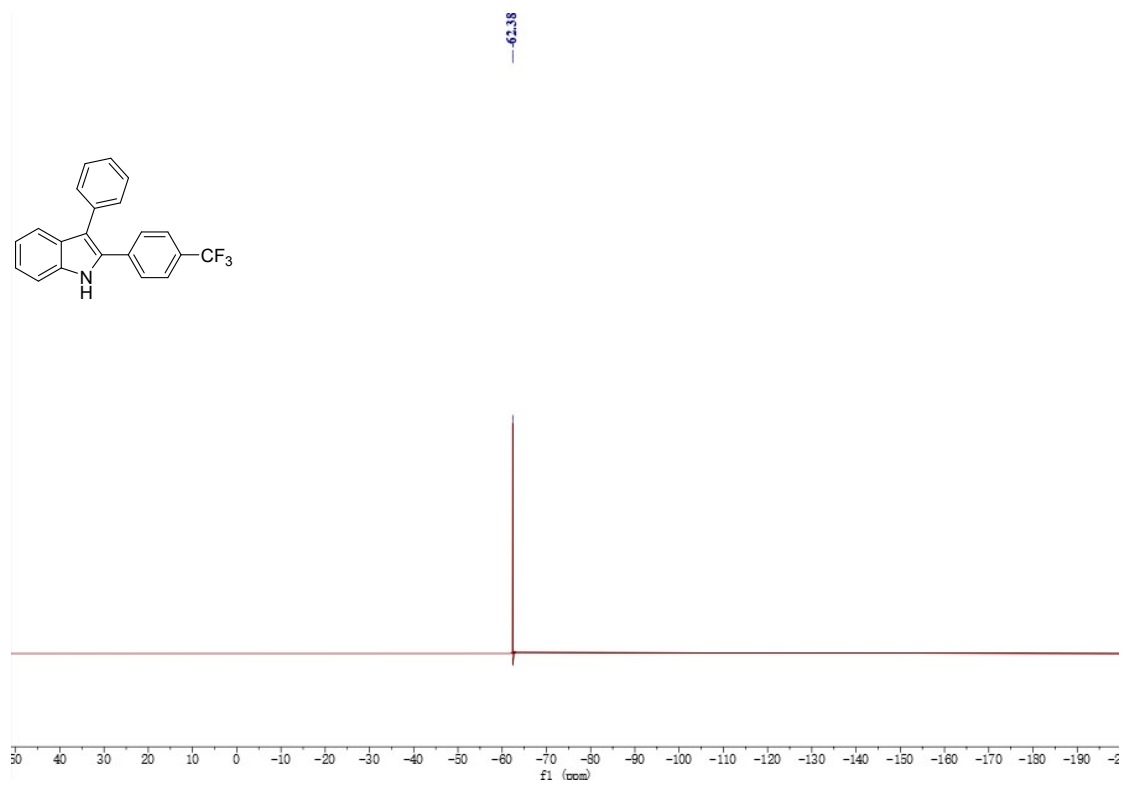

$^1\text{H}$  NMR of **52** (400 MHz,  $\text{CDCl}_3$ )

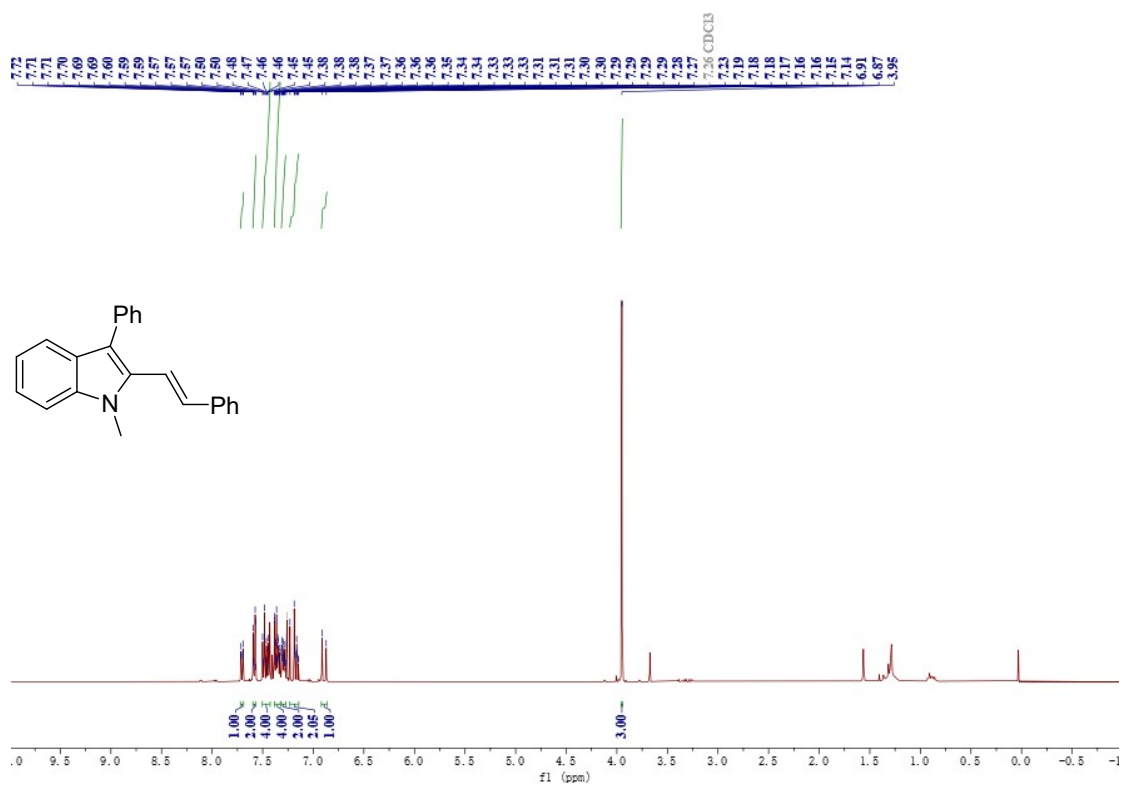

$^{13}\text{C}$  NMR of **52** (101 MHz,  $\text{CDCl}_3$ )

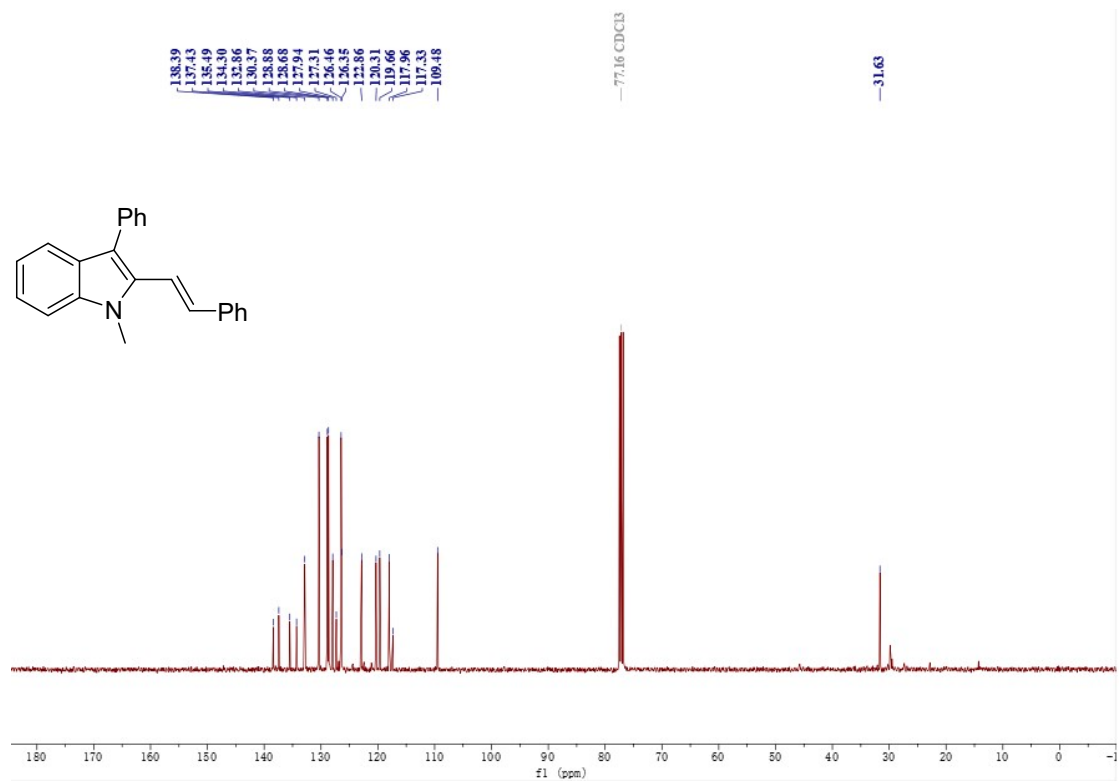

$^1\text{H}$  NMR of **53** (400 MHz, CDCl<sub>3</sub>)

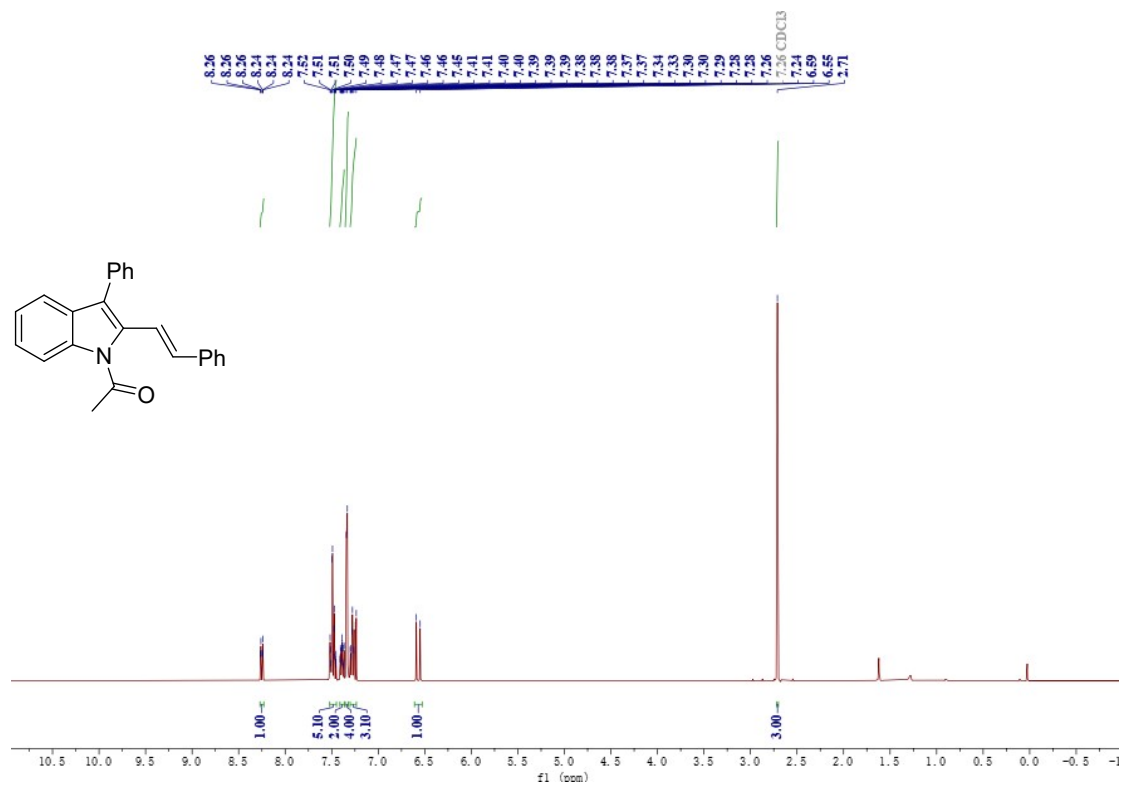

$^{13}\text{C}$  NMR of **53** (101 MHz, CDCl<sub>3</sub>)

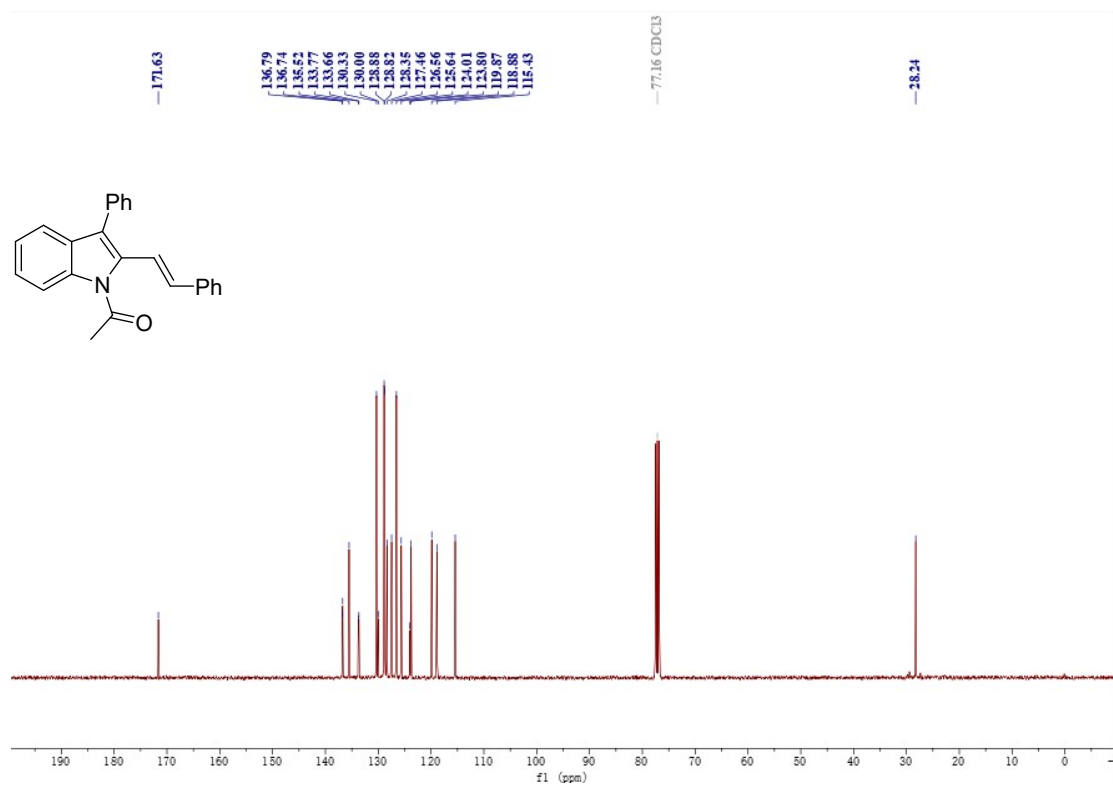

$^1\text{H}$  NMR of **54** (400 MHz, CDCl<sub>3</sub>)

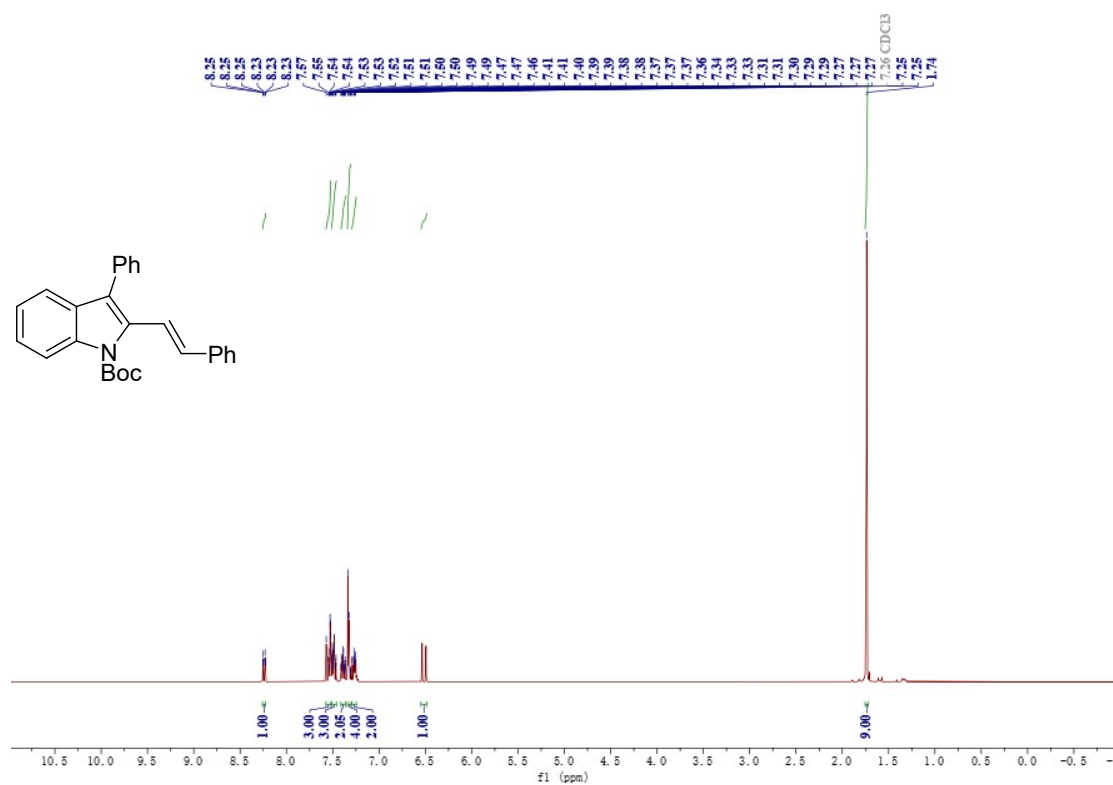

$^{13}\text{C}$  NMR of **54** (101 MHz, CDCl<sub>3</sub>)

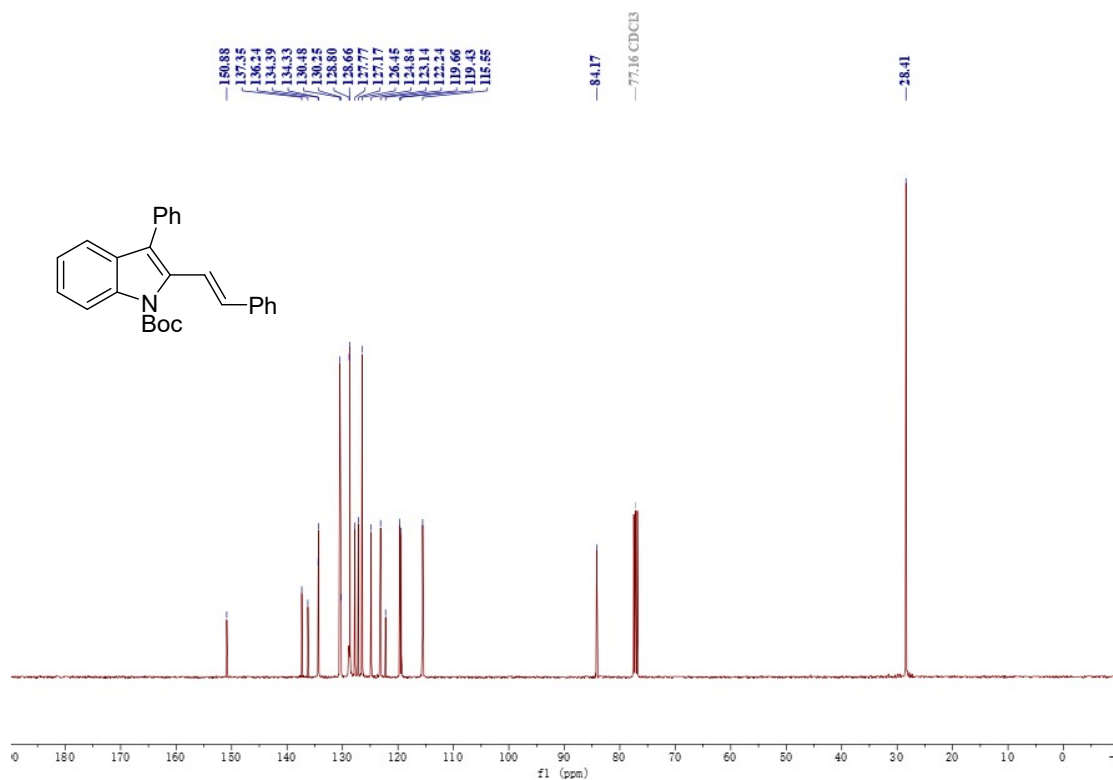

<sup>1</sup>H NMR of **55** (400 MHz, CDCl<sub>3</sub>)

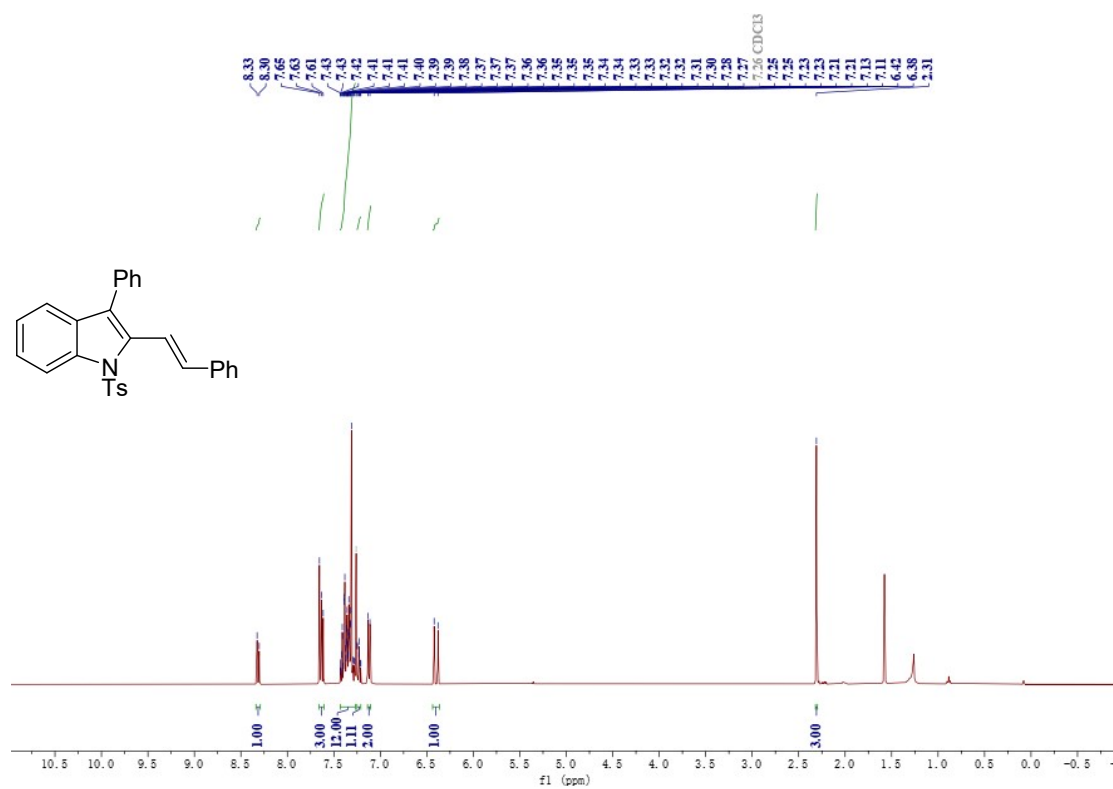

<sup>13</sup>C NMR of **55** (101 MHz, CDCl<sub>3</sub>)

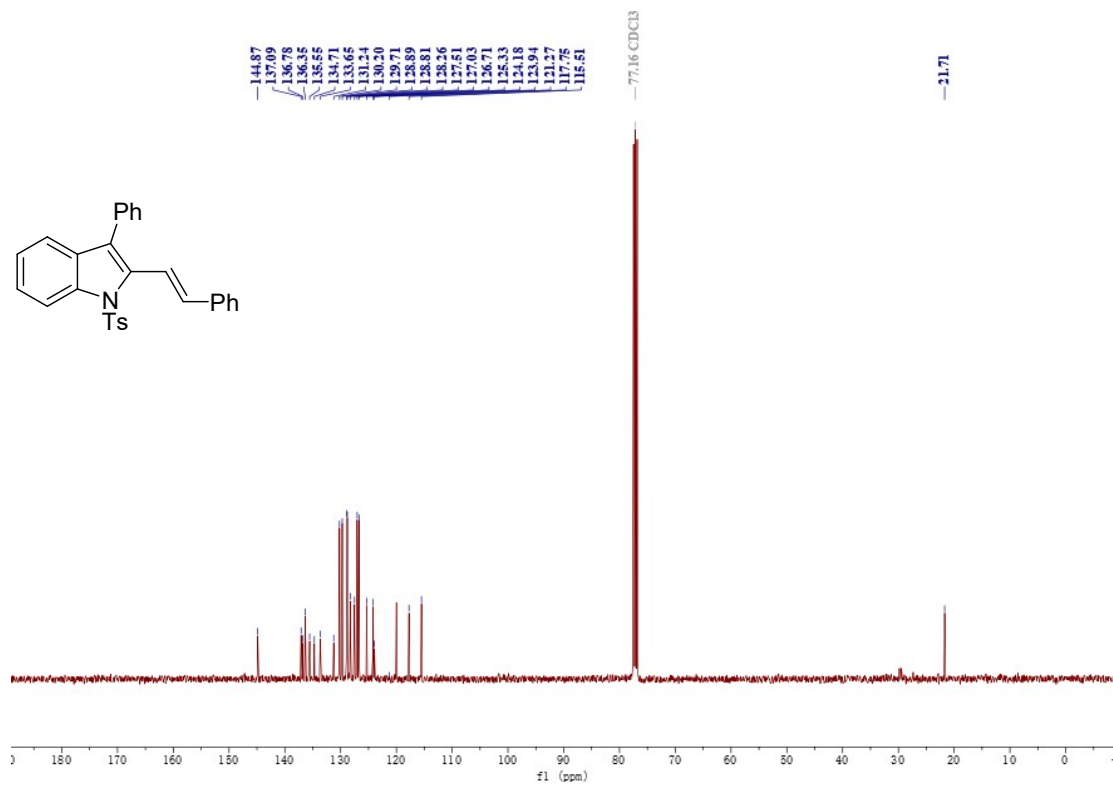

$^1\text{H}$  NMR of **56** (400 MHz,  $\text{CDCl}_3$ )

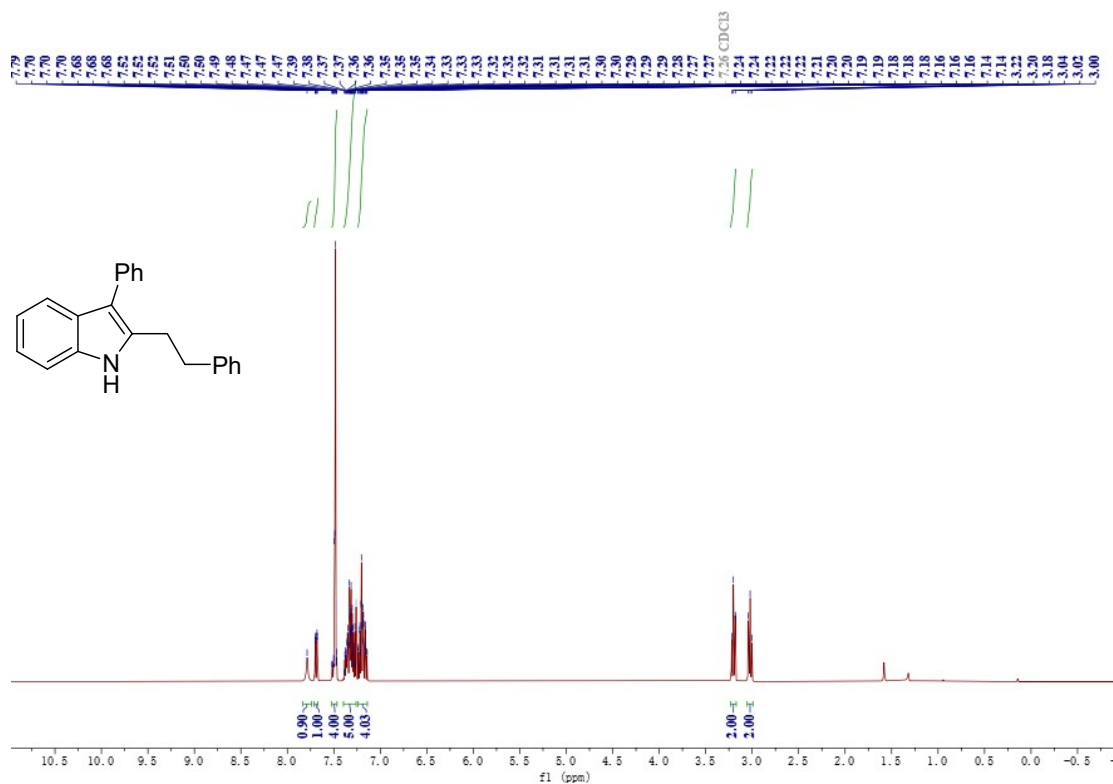

$^{13}\text{C}$  NMR of **56** (101 MHz,  $\text{CDCl}_3$ )

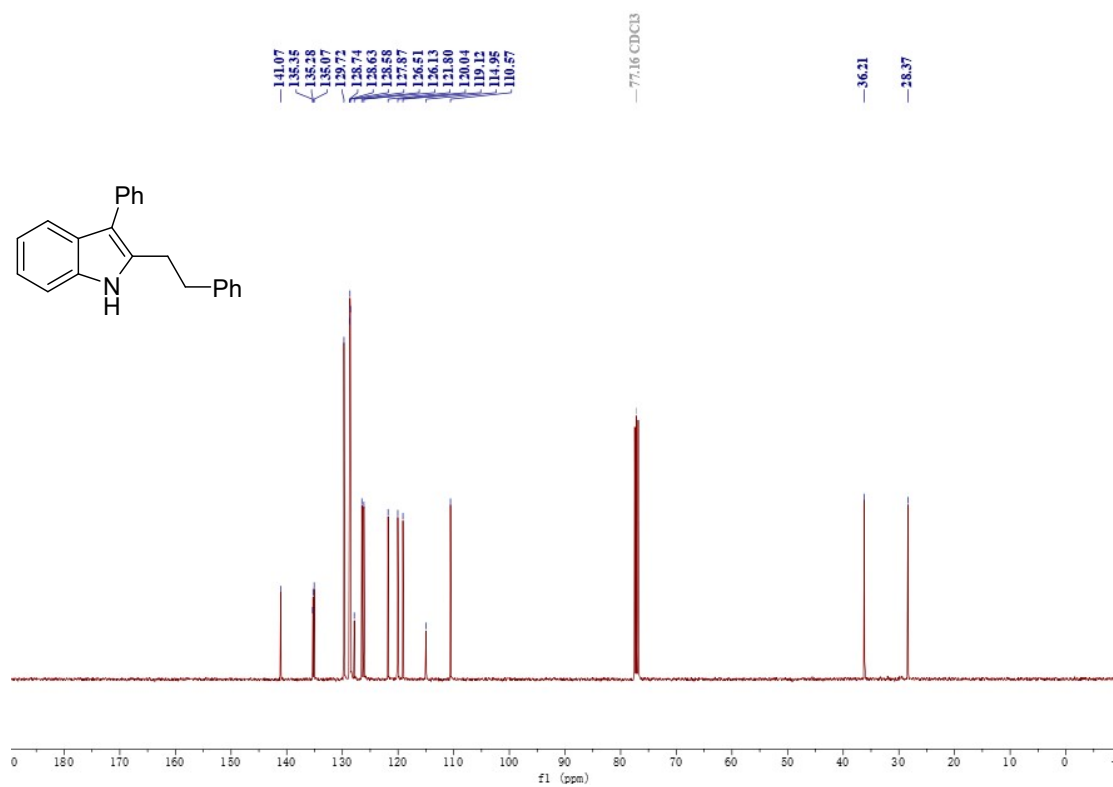

Supplement: d4gc02859g1.pdf [file d4gc02859g1.pdf]
